# Supplementary material for: Improving the quantum yield of luminescence for three-coordinated gold(i) TADF emitters by exploiting inversion symmetry and using perhaloaryl ligands
Source: Royal Society of Chemistry journal article supplement (doi:10.1039/d4tc02133a), 2024-01-01
Supplement: d4tc02133a1.pdf [file d4tc02133a1.pdf]

## Electronic Supplementary Information

### Improving the Quantum Yield of Luminescence for Three-coordinated Gold(I) TADF Emitters by Exploiting Inversion Symmetry and Using Perhaloaryl Ligands

Inés Soldevilla,<sup>a</sup> Abdel Ghafour El-Hachimi,<sup>a</sup> Ruslan Ramazanov,<sup>b</sup> Rashid R. Valiev,<sup>b</sup> M. Elena Olmos,<sup>a</sup> Miguel Monge,<sup>a</sup> Dage Sundholm,<sup>b</sup> María Rodríguez-Castillo,<sup>a,\*</sup> and José M. López-de-Luzuriaga<sup>a,\*</sup>

<sup>a</sup>Departamento de Química, Universidad de La Rioja, Instituto de Investigación en Química de la Universidad de La Rioja (IQUR), Complejo Científico-Tecnológico, 26006 – Logroño, Spain. E-mail: [josemaria.lopez@unirioja.es](mailto:josemaria.lopez@unirioja.es), [maria.rodriguez@unirioja.es](mailto:maria.rodriguez@unirioja.es).

<sup>b</sup>Department of Chemistry, Faculty of Science, University of Helsinki, P.O. Box 55, (A.I: Virtasen aukio 1), FIN-00014, Finland

#### Table of contents

- I. Characterization of complexes 1-3**
  - 1. IR spectra
  - 2. <sup>1</sup>H NMR spectra (400 MHz, 298K)
  - 3. <sup>19</sup>F NMR spectra (282 MHz, 298K)
  - 4. <sup>31</sup>P{<sup>1</sup>H} NMR spectra (122 MHz, 298K)
  - 5. Single crystals X-ray diffraction analyses
  
- II. Optical Properties**
  - 1. UV-Vis absorption spectra in solid state
  - 2. Excitation and emission spectra
  - 3. Lifetimes at RT and at 77 K
  - 4. TADF studies

### III. Computational Methods

1. Coordination environment for the gold(I) centers for complexes **1-3** at the ground state  $S_0$ , the first singlet excited state  $S_1$  and the first triplet excited state  $T_1$
2. Frontier HOMO and LUMO for complexes **1-3**
3. Transition density calculations for complexes **1-3**
4. Electrostatic Potential Surface (ESP) calculations for complexes **2** and **3**
5. TD-DFT Calculations for complexes **2** and **3**
6. Population analysis
7. TD-DFT singlet excitation for models **1a-3a**
8. Excitation energies (eV)
9. Representation of DFT optimized complexes **1-3** in the  $S_0$  state (B3LYP functional)
10. xyz coordinates for models **1a-3a** in the  $S_0$  state (B3LYP functional)
11. Representation of DFT optimized complexes **1-3** in the  $T_1$  state (B3LYP functional)
12. xyz coordinates for models **1a-3a** in the  $T_1$  state (B3LYP functional)
13. Representation of DFT optimized complexes **1-3** in the  $S_0$  state (PBE0 functional)
14. xyz coordinates for models **1a-3a** in the  $S_0$  state (PBE0 functional)
15. Representation of DFT optimized complexes **1-3** in the  $S_1$  state (PBE0 functional)
16. xyz coordinates for models **1a-3a** in the  $S_1$  state (PBE0 functional)
17. Representation of DFT optimized complexes **1-3** in the  $T_1$  state (PBE0 functional)
18. xyz coordinates for models **1a-3a** in the  $T_1$  state (PBE0 functional)

## I. Characterization of complexes 1-3

### 1. IR spectra

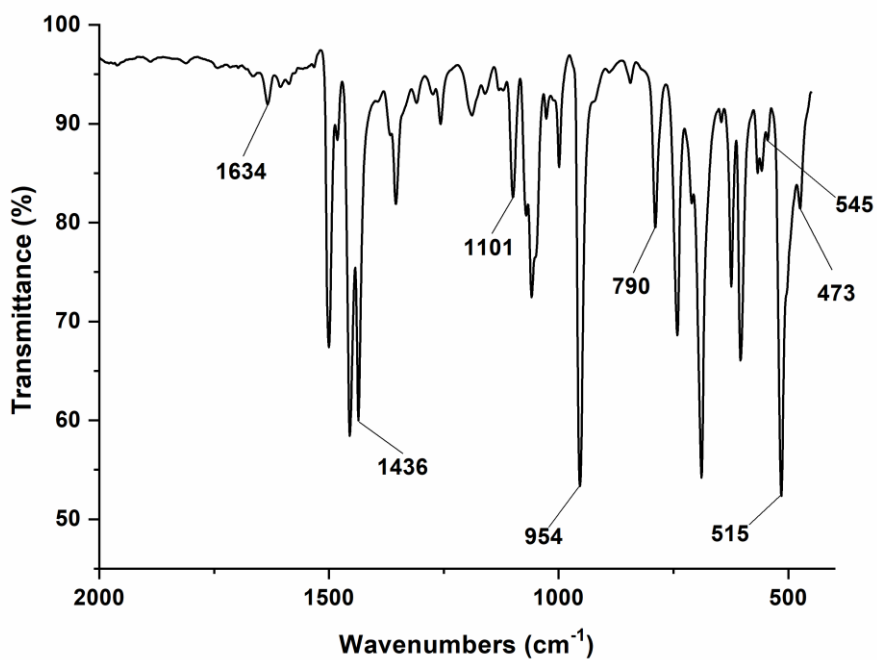

Figure S1. FT-IR spectrum of complex 1.

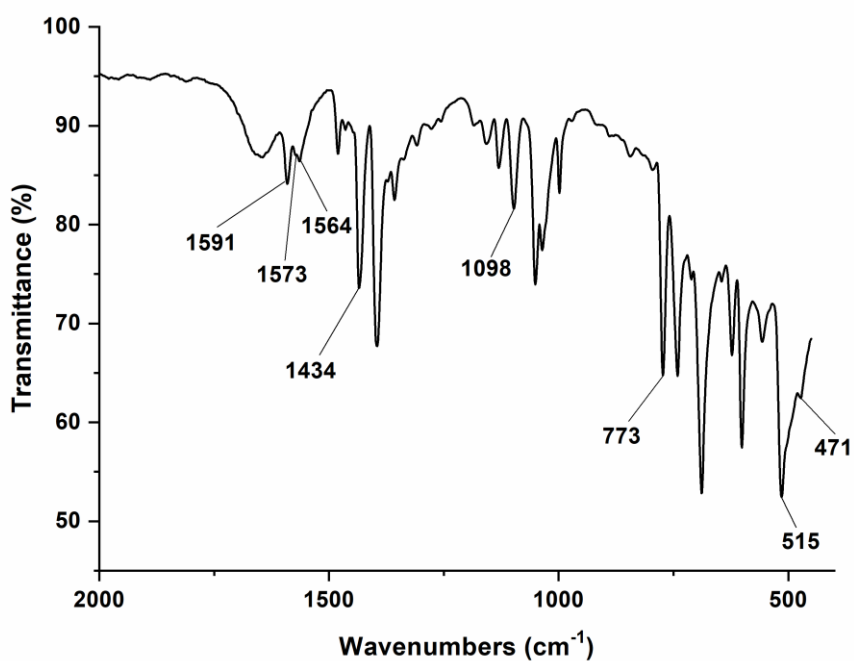

Figure S2. FT-IR spectrum of complex 2.

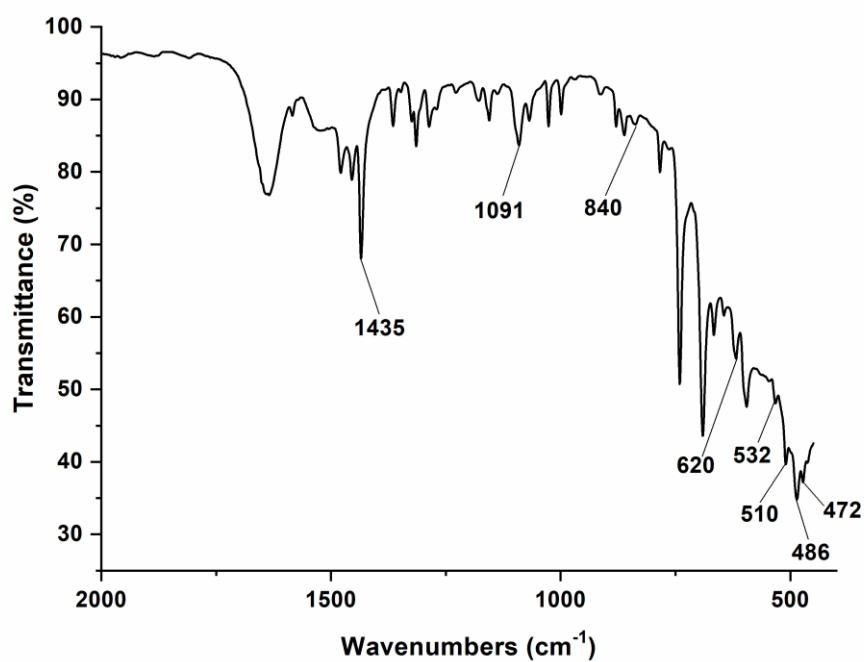

Figure S3. FT-IR spectrum of complex 3.

2. <sup>1</sup>H NMR spectra (400 MHz, 298K)

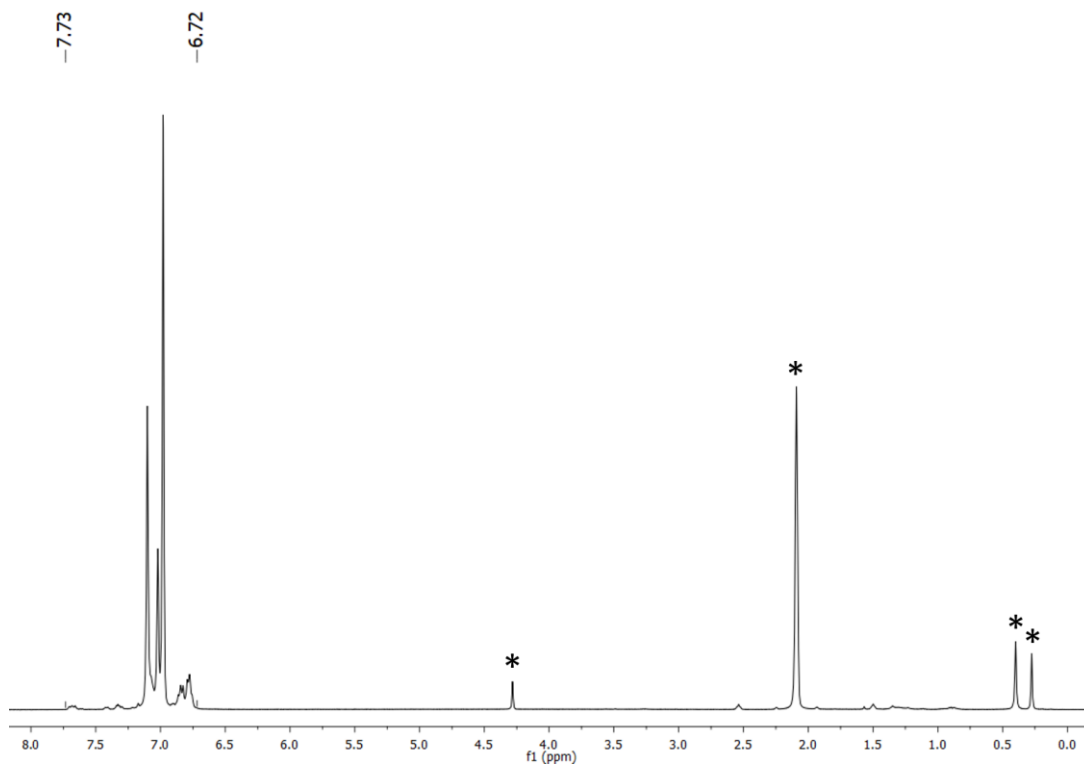

Figure S4. <sup>1</sup>H NMR spectrum of complex 1 in toluene-*d*<sub>8</sub>.

(\* Solvent residual peaks)

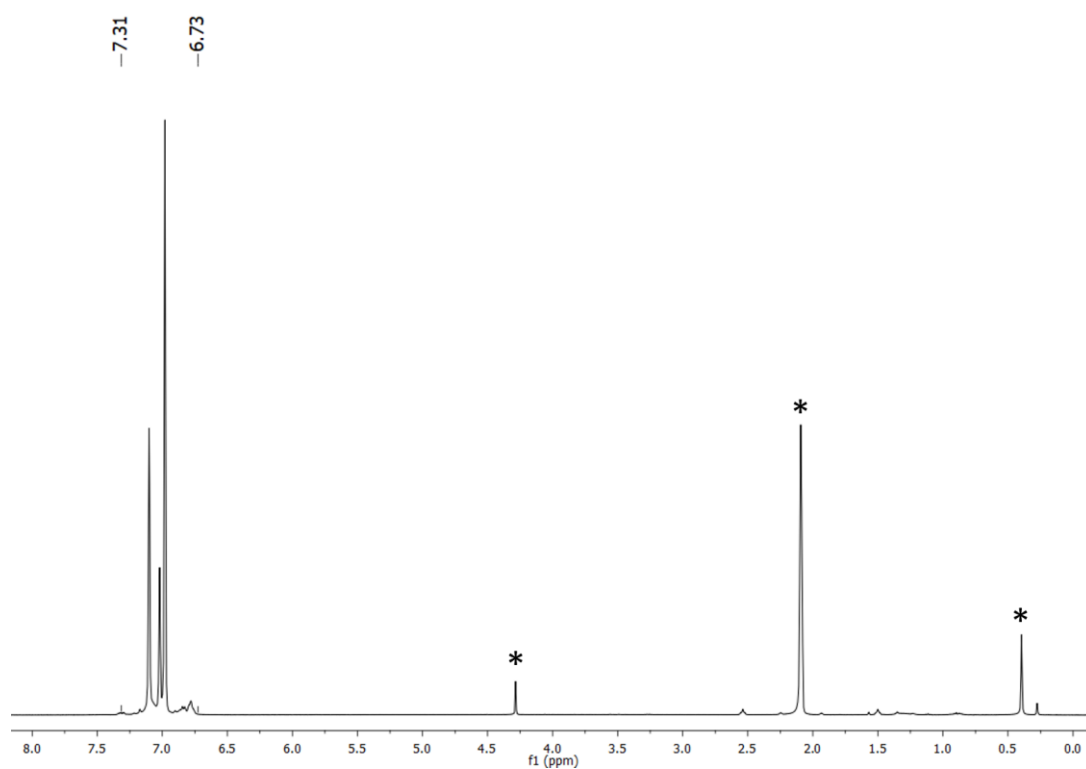

**Figure S5.**  $^1\text{H}$  NMR spectrum of complex **2** in toluene- $d_8$ .

(\* Solvent residual peaks)

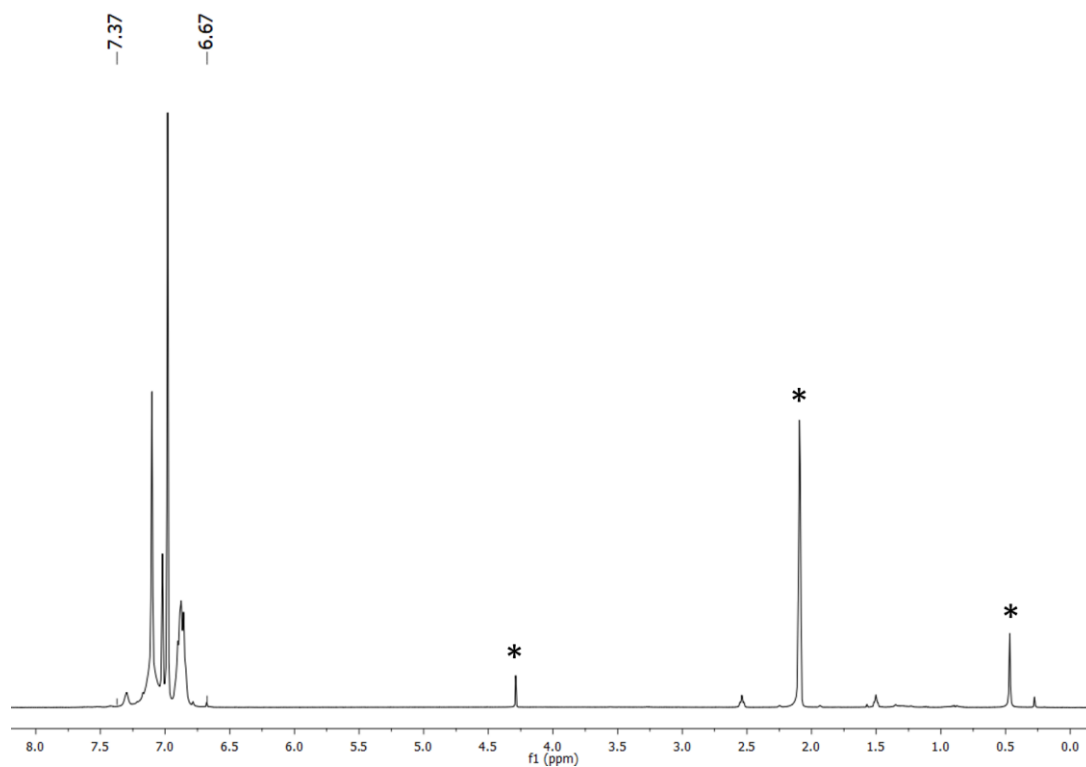

**Figure S6.**  $^1\text{H}$  NMR spectrum of complex **3** in toluene- $d_8$ .

(\* Solvent residual peaks)

3.  $^{19}\text{F}$  NMR spectra (282 MHz, 298K)

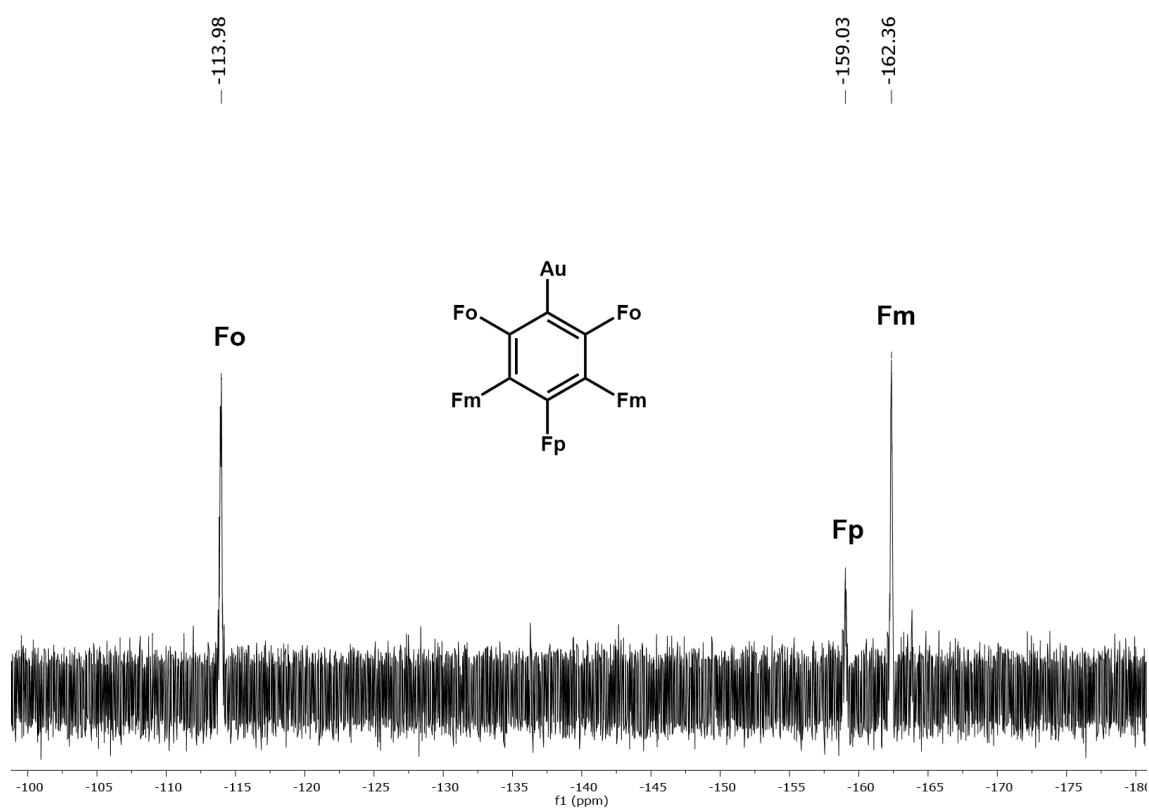

Figure S7.  $^{19}\text{F}$  NMR spectrum of complex 1 in  $\text{toluene-}d_8$ .

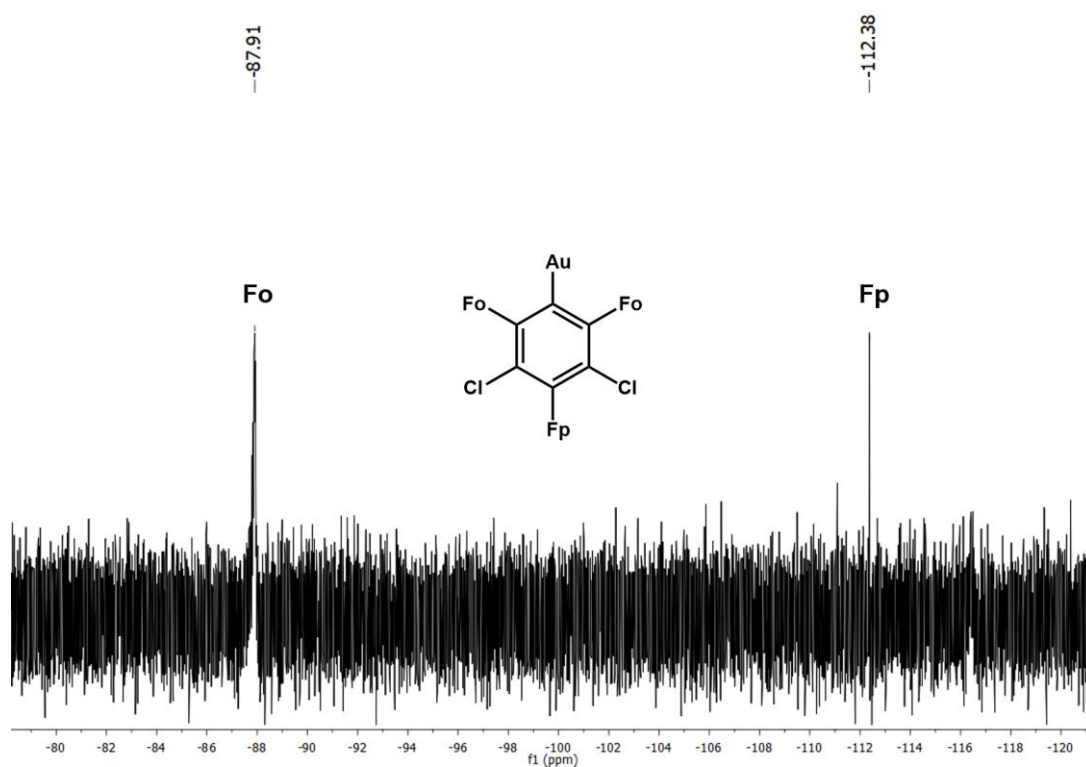

Figure S8.  $^{19}\text{F}$  NMR spectrum of complex 2 in  $\text{toluene-}d_8$ .

4.  $^{31}\text{P}\{^1\text{H}\}$  NMR spectra (122 MHz, 298K)

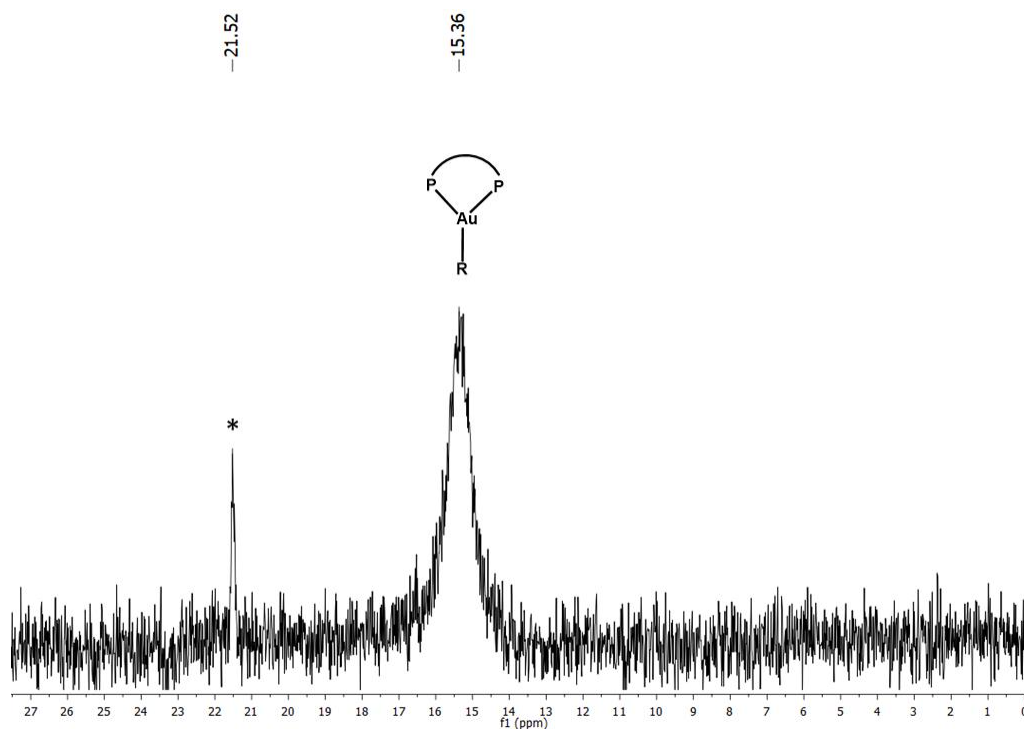

Figure S9.  $^{31}\text{P}\{^1\text{H}\}$  NMR spectrum of complex 1 in  $\text{toluene-}d_8$ .

(\* Tetracoordinated gold(I) complex)

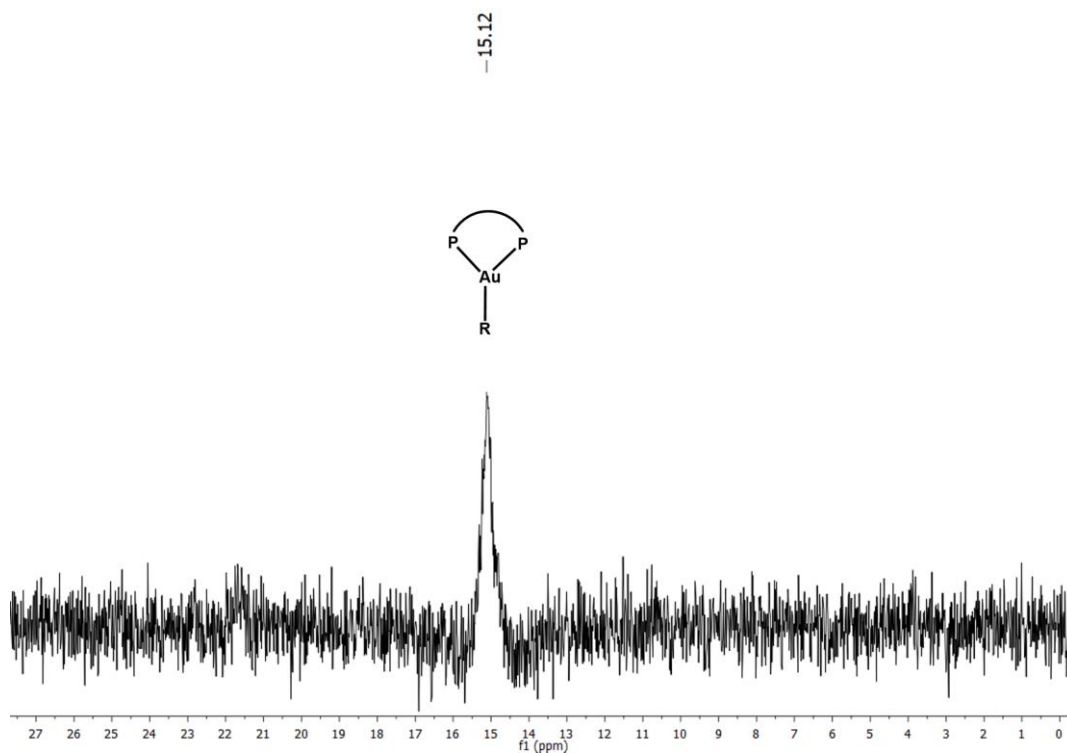

Figure S10.  $^{31}\text{P}\{^1\text{H}\}$  NMR spectrum of complex 2 in  $\text{toluene-}d_8$ .

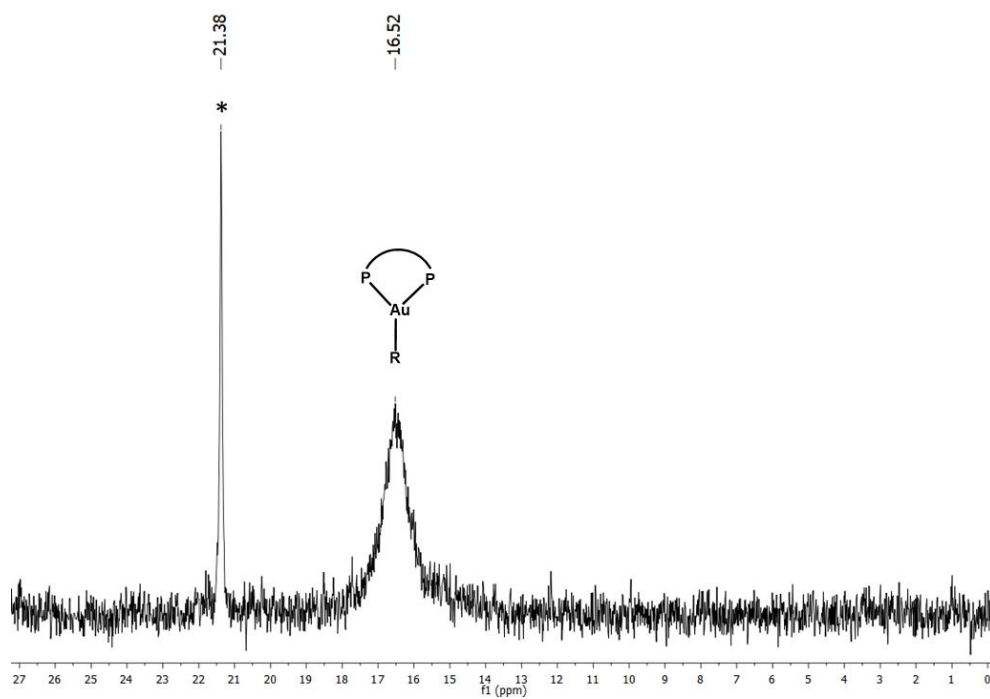

**Figure S11.**  $^{31}\text{P}\{^1\text{H}\}$  NMR spectrum of complex **3** in toluene- $d_8$ .  
(\* Tetracoordinated gold(I) complex)



## 5. Single crystals X-ray diffraction analyses

**Table S1.** Data collection and structure refinement details for **1** and **3**.

|                                                               | <b>1</b> ·C <sub>6</sub> H <sub>12</sub>                                                                       | <b>3</b>                                                                        |
|---------------------------------------------------------------|----------------------------------------------------------------------------------------------------------------|---------------------------------------------------------------------------------|
| Chemical Formula                                              | C <sub>66</sub> H <sub>42</sub> Au <sub>2</sub> F <sub>10</sub> P <sub>4</sub> ·C <sub>6</sub> H <sub>12</sub> | C <sub>66</sub> H <sub>42</sub> Au <sub>2</sub> Cl <sub>10</sub> P <sub>4</sub> |
| Crystal habit                                                 | Orange prism                                                                                                   | Orange prism                                                                    |
| Crystal size/mm                                               | 0.043x0.034x0.028                                                                                              | 0.155x0.096x0.030                                                               |
| Crystal system                                                | Monoclinic                                                                                                     | Triclinic                                                                       |
| Space group                                                   | C2/c                                                                                                           | P-1                                                                             |
| <i>a</i> /Å                                                   | 27.618(2)                                                                                                      | 11.8447(8)                                                                      |
| <i>b</i> /Å                                                   | 13.6224(10)                                                                                                    | 12.2786(8)                                                                      |
| <i>c</i> /Å                                                   | 22.572(2)                                                                                                      | 13.4926(11)                                                                     |
| $\alpha$ /°                                                   | 90                                                                                                             | 85.614(3)                                                                       |
| $\beta$ /°                                                    | 125.596(5)                                                                                                     | 74.160(2)                                                                       |
| $\gamma$ /°                                                   | 90                                                                                                             | 64.692(2)                                                                       |
| <i>V</i> /Å <sup>3</sup>                                      | 6905.4(11)                                                                                                     | 1704.8(2)                                                                       |
| <i>Z</i>                                                      | 4                                                                                                              | 1                                                                               |
| <i>D<sub>c</sub></i> /g cm <sup>-3</sup>                      | 1.565                                                                                                          | 1.663                                                                           |
| <i>M</i>                                                      | 1626.96                                                                                                        | 1707.31                                                                         |
| F(000)                                                        | 3176                                                                                                           | 826                                                                             |
| <i>T</i> /°C                                                  | 100(2)                                                                                                         | 100(2)                                                                          |
| 2 $\theta$ max/°                                              | 53.464                                                                                                         | 55.872                                                                          |
| $\mu$ (Mo-K $\alpha$ )/mm <sup>-1</sup>                       | 4.404                                                                                                          | 4.822                                                                           |
| No. refl. Measured                                            | 7334                                                                                                           | 38924                                                                           |
| No. unique refl.                                              | 7334                                                                                                           | 38924                                                                           |
| <i>R</i> <sub>int</sub>                                       | 0.1631                                                                                                         | 0.0708                                                                          |
| <i>R</i> [ <i>F</i> >2 $\sigma$ ( <i>F</i> )] <sup>[a]</sup>  | 0.0684                                                                                                         | 0.0455                                                                          |
| <i>wR</i> [ <i>F</i> <sup>2</sup> , all refl.] <sup>[b]</sup> | 0.1570                                                                                                         | 0.1101                                                                          |
| No. of refl. Used [ <i>F</i> >2 $\sigma$ ( <i>F</i> )]        | 7334                                                                                                           | 8106                                                                            |
| No. of parameters                                             | 382                                                                                                            | 370                                                                             |
| No. of restraints                                             | 104                                                                                                            | 83                                                                              |
| <i>S</i> <sup>[c]</sup>                                       | 1.092                                                                                                          | 1.031                                                                           |
| Max. residual electron density/e·Å <sup>-3</sup>              | 2.165                                                                                                          | 2.690                                                                           |

<sup>a</sup>  $R: (F) = \sum |F_o| - |F_c| / \sum |F_o|$ .

<sup>b</sup>  $wR: (F^2) = [\sum \{w(F_o^2 - F_c^2)^2\} / \sum \{w(F_o^2)^2\}]^{0.5}$ ;  $w^{-1} = \sigma^2(F_o^2) + (aP)^2 + bP$ , where  $P = [F_o^2 + 2F_c^2]/3$  and *a* and *b* are constants adjusted by the program.

<sup>c</sup>  $S = [\sum \{w(F_o^2 - F_c^2)^2\} / (n-p)]^{0.5}$ , where *n* is the number of data and *p* the number of parameters.

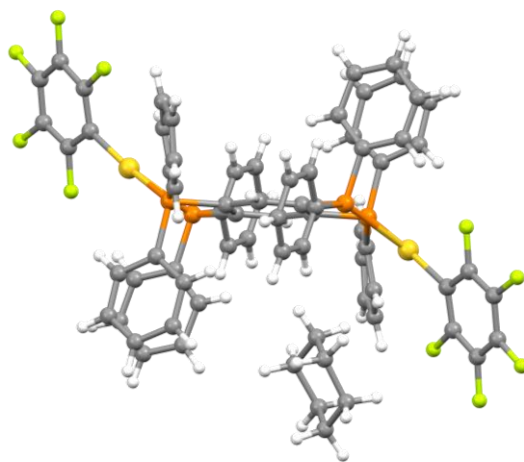

**Figure S12.** Molecular structure of complex **1**·C<sub>6</sub>H<sub>12</sub>.

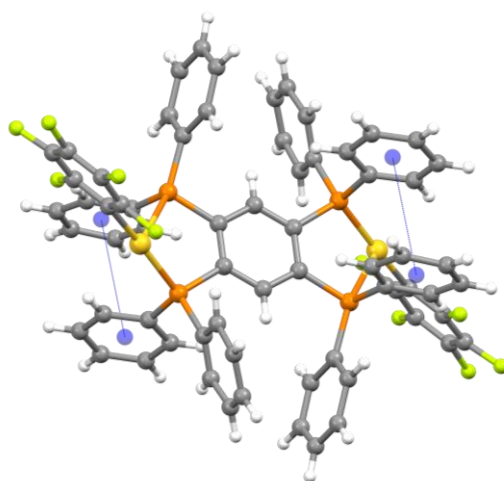

[Au<sub>2</sub>(C<sub>6</sub>F<sub>5</sub>)<sub>2</sub>(tpbz)] (**1**)

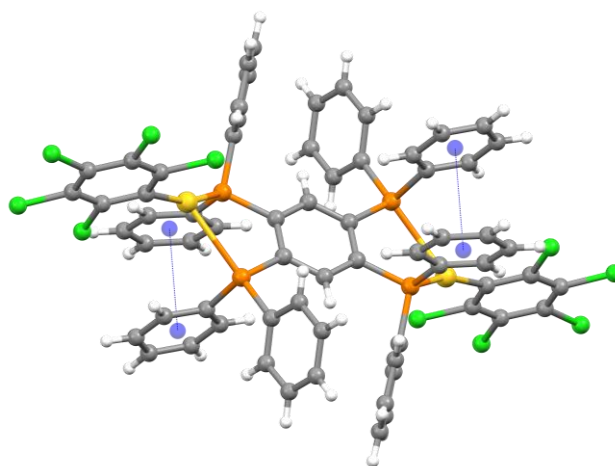

[Au<sub>2</sub>(C<sub>6</sub>Cl<sub>5</sub>)<sub>2</sub>(tpbz)] (**3**)

**Figure S13.** Molecular structures of complexes **1** (top) and **3** (bottom) showing π···π stacking interaction between phenyl rings.

## II. Optical properties

### 1. UV-Vis absorption spectra in solid state

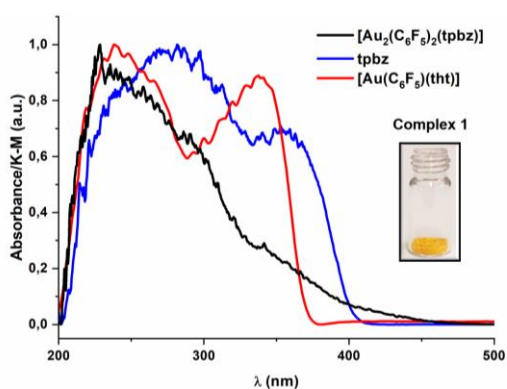

**Figure S14.** UV-Vis absorption spectra in solid state for complexes  $[\text{Au}_2(\text{C}_6\text{F}_5)_2(\text{tpbz})]$  (**1**) (black),  $\text{tpbz}$  (blue) and  $[\text{Au}(\text{C}_6\text{F}_5)(\text{tht})]$  (red).

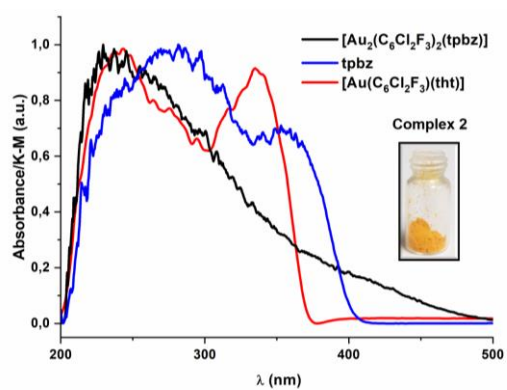

**Figure S15.** UV-Vis absorption spectra in solid state for complexes  $[\text{Au}_2(\text{C}_6\text{Cl}_2\text{F}_3)_2(\text{tpbz})]$  (**2**) (black),  $\text{tpbz}$  (blue) and  $[\text{Au}(\text{C}_6\text{Cl}_2\text{F}_3)(\text{tht})]$  (red).

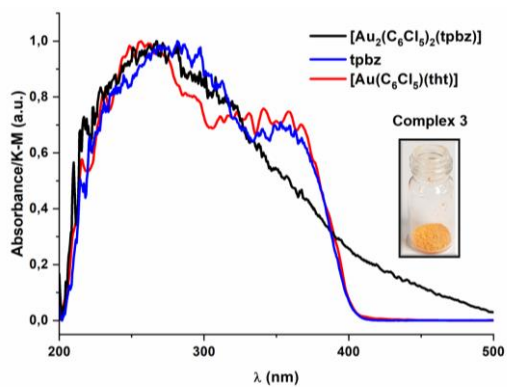

**Figure S16.** UV-Vis absorption spectra in solid state for complexes  $[\text{Au}_2(\text{C}_6\text{Cl}_5)_2(\text{tpbz})]$  (**3**) (black),  $\text{tpbz}$  (blue) and  $[\text{Au}(\text{C}_6\text{Cl}_5)(\text{tht})]$  (red).

## 2. Excitation and emission spectra

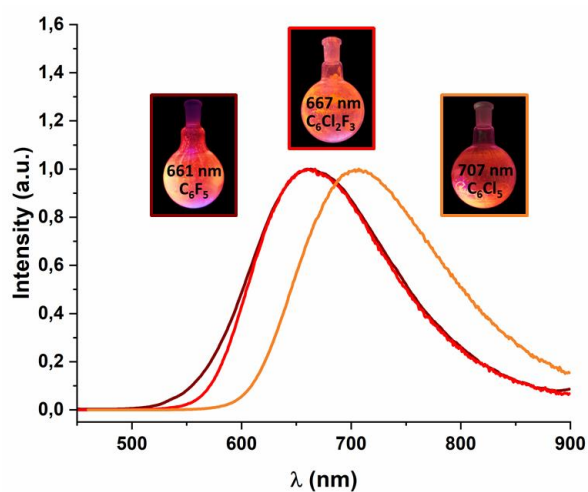

**Figure S17.** Emission spectra in the solid state of the complexes  $[(Au_2(C_6F_5)_2(tpbz))] (1)$  (ma-ron),  $[(Au_2(C_6Cl_3F_2)_2(tpbz))] (2)$  (red) and  $[(Au_2(C_6Cl_5)_2(tpbz))] (3)$  (orange) measured at 77 K

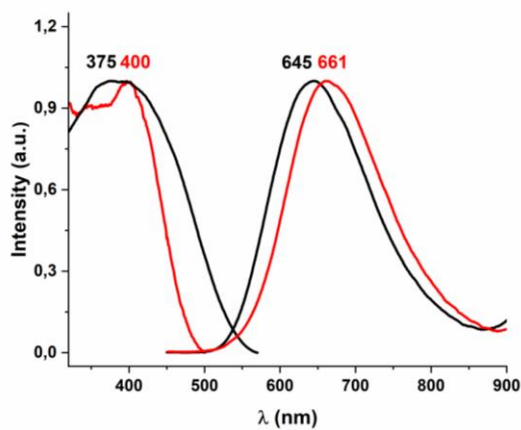

**Figure S18.** Excitation and emission spectra in solid state for complex **1** at room temperature (black) and 77K (red).

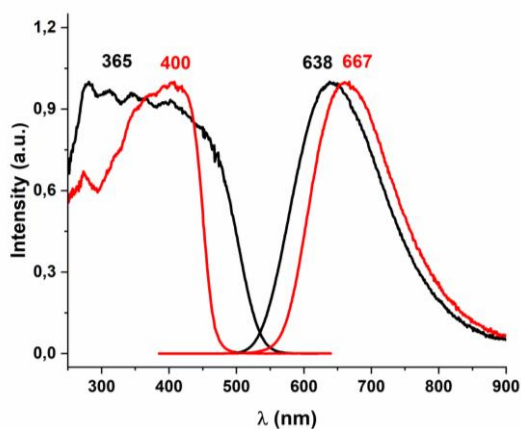

**Figure S19.** Excitation and emission spectra in solid state for complex **2** at room temperature (black) and 77K (red).

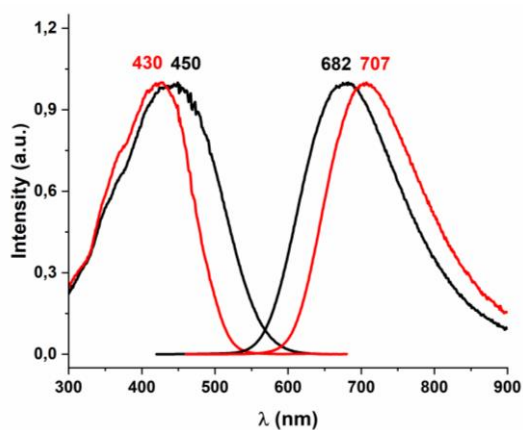

**Figure S20.** Excitation and emission spectra in solid state for complex **3** at room temperature (black) and 77K.

### 3. Lifetimes

Complex 1:

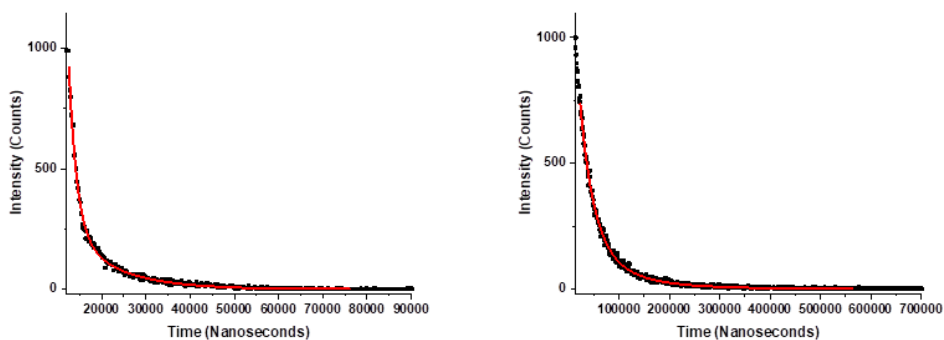

**Figure S21.** Lifetime decay for complex **1** at room temperature:  $\tau_1 = 3.93 \pm 0.10 \mu\text{s}$  (100%) (left) and at 77 K:  $\tau_1 = 41.20 \pm 1.34 \mu\text{s}$  (100%) (right).

Complex 2:

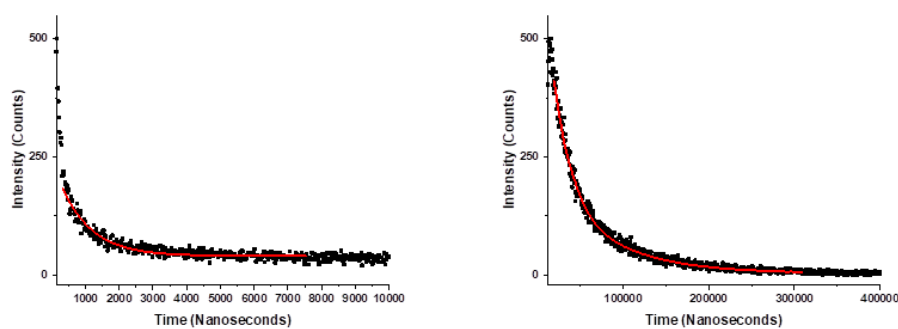

**Figure S22.** Lifetime decay for complex **2** at room temperature:  $\tau_1 = 0.90 \pm 0.03 \mu\text{s}$  (100%) (left) and at 77 K:  $\tau_1 = 27.83 \pm 1.34 \mu\text{s}$  (100%) (right).

Complex 3:

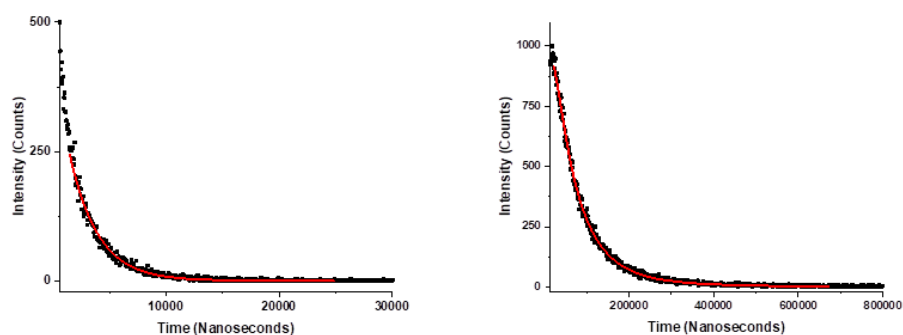

**Figure S23.** Lifetime decay for complex **3** at room temperature:  $\tau_1 = 2.50 \pm 0.03 \mu\text{s}$  (100%) (left) and at 77 K:  $\tau_1 = 60.78 \pm 2.90 \mu\text{s}$  (100%) (right).

#### 4. TADF studies

Boltzmann-type equation:

$$\tau_{av} = \frac{3 + \exp(-\Delta E(S_1 - T_1)/k_B T)}{3/\tau_T + 1/\tau_S \exp(\Delta E(S_1 - T_1)/k_B T)} \quad (\text{Eq. S1})$$

where  $k_B$  is Boltzmann's constant.  $\tau_T$  and  $\tau_S$  are the phosphorescence ( $T_1 \rightarrow S_0$ ) decay time and the prompt fluorescence ( $S_1 \rightarrow S_0$ ) decay time without thermal activation, respectively.

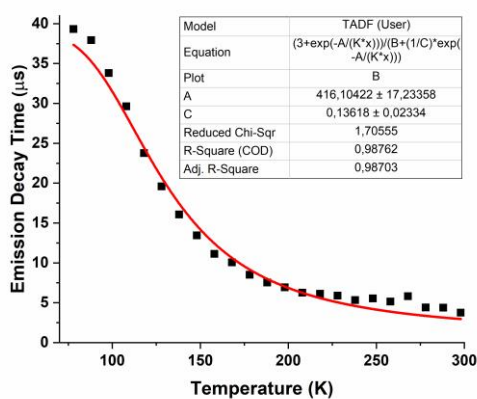

**Figure S24.** Temperature dependence of the emission decay time for complex **1**. The solid red line represents the fit of the experimental data according to Eq. S1. The fit parameters are showed in the attached tables.

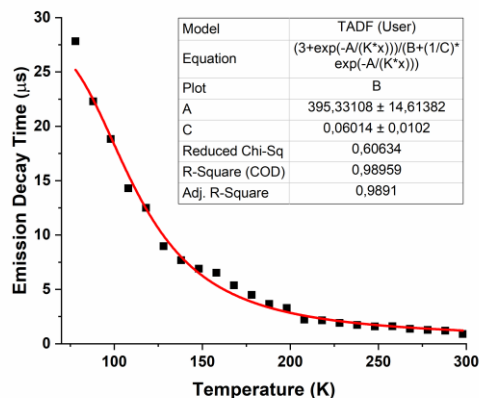

**Figure S25.** Temperature dependence of the emission decay time for complex **2**. The solid red line represents the fit of the experimental data according to Eq. S1. The fit parameters are showed in the attached tables.

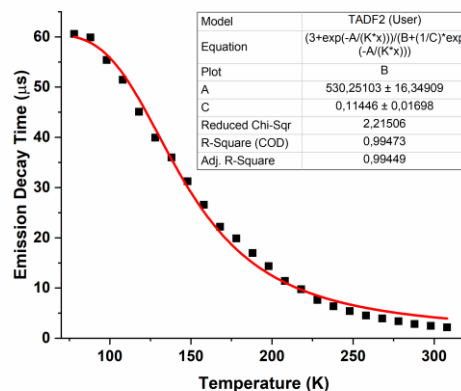

**Figure S26.** Temperature dependence of the emission decay time for complex **3**. The solid red line represents the fit of the experimental data according to Eq. S1. The fit parameters are showed in the attached tables.

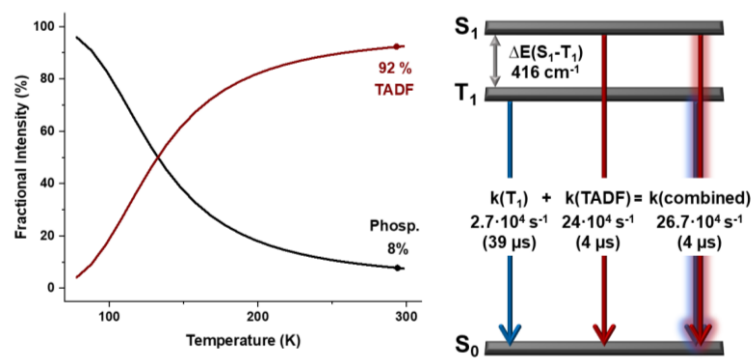

**Figure S27.** Left: Fractional emission intensities (simulation results) stemming from TADF (maroon) and direct phosphorescence (black) as a function of temperature calculated on the basis of the experimental data from figure S23 and Equations. 2 and 3 (main text) for complex **1**; Right: Schematic energy level diagram and decay times of **1** in powder.

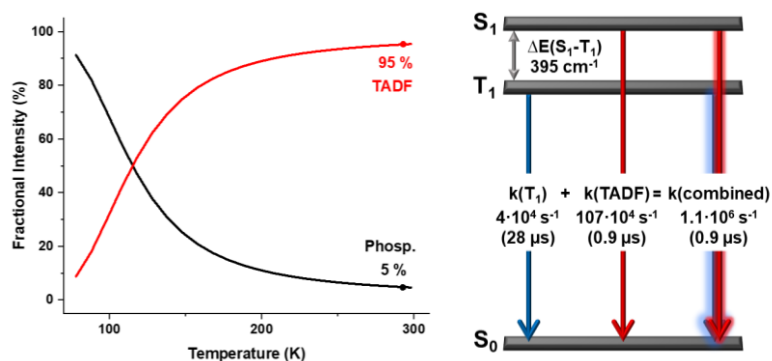

**Figure S28.** Left: Fractional emission intensities (simulation results) stemming from TADF (red) and direct phosphorescence (black) as a function of temperature calculated on the basis of the experimental data from figure S24 and Equations. 2 and 3 (main text) for complex **2**; Right: Schematic energy level diagram and decay times of **2** in powder.

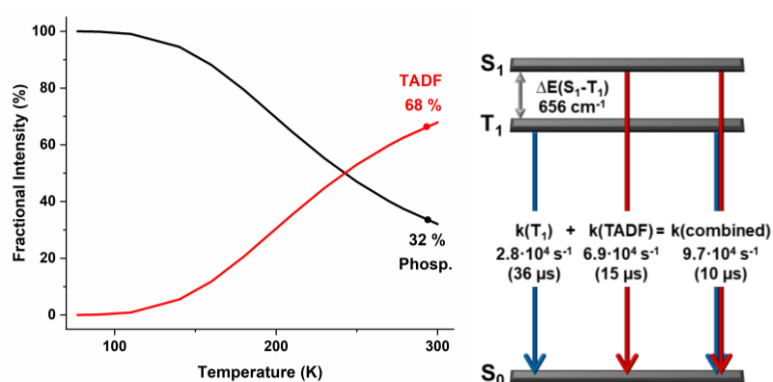

**Figure S29.** Left: Fractional emission intensities (simulation results) stemming from TADF (red) and direct phosphorescence (black) as a function of temperature calculated on the basis of the experimental data from ref. 30 main text and Equations. 2 and 3 (main text) for **monomer** [Au(C<sub>6</sub>F<sub>5</sub>)dppBz] (**1m**); Right: Schematic energy level diagram and decay times of monomer [Au(C<sub>6</sub>F<sub>5</sub>)dppBz] (**1m**) in powder.

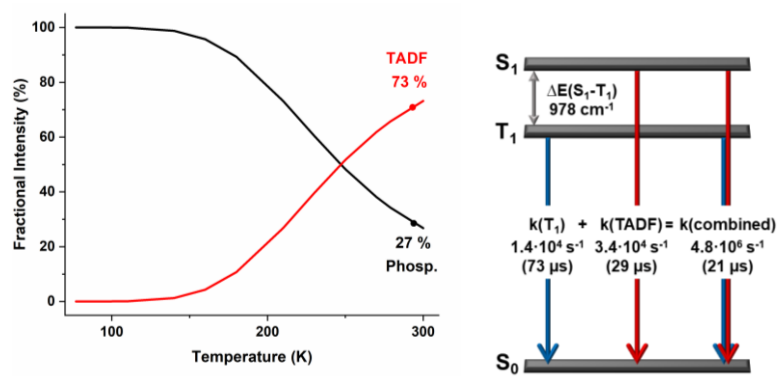

**Figure S30.** Left: Fractional emission intensities (simulation results) stemming from TADF (red) and direct phosphorescence (black) as a function of temperature calculated on the basis of the experimental data from ref. 30 main text and Equations. 2 and 3 (main text) for **monomer** [Au(C<sub>6</sub>Cl<sub>2</sub>F<sub>3</sub>)dppBz] (**2m**); Right: Schematic energy level diagram and decay times of monomer [Au(C<sub>6</sub>Cl<sub>2</sub>F<sub>3</sub>)dppBz] (**2m**) in powder.



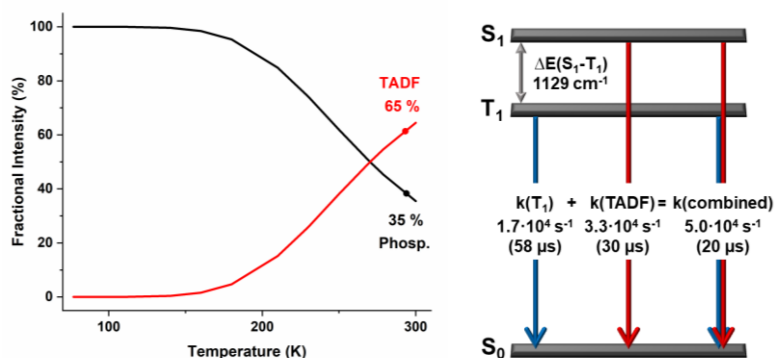

**Figure S31.** Left: Fractional emission intensities (simulation results) stemming from TADF (red) and direct phosphorescence (black) as a function of temperature calculated on the basis of the experimental data from ref. 30 main text and Equations. 2 and 3 (main text) for **monomer** [Au(C<sub>6</sub>Cl<sub>5</sub>)dppBz] (**3m**); Right: Schematic energy level diagram and decay times of monomer [Au(C<sub>6</sub>Cl<sub>5</sub>)dppBz] (**3m**) in powder.

**Table S2.** Photophysical parameters for monomers **1m-3m**.

|       |                                  | <b>1 m</b>         | <b>2 m</b>         | <b>3 m</b>         |
|-------|----------------------------------|--------------------|--------------------|--------------------|
| 298 K | $\lambda_{em} / \text{nm}$       | 560                | 545                | 555                |
|       | $\tau / \mu\text{s}$             | 10.3               | 20.8               | 19.9               |
|       | $\Phi / \%$                      | 29                 | 16                 | 11                 |
|       | $k_r^a / \text{s}^{-1}$          | $28.16 \cdot 10^3$ | $7.69 \cdot 10^3$  | $5.53 \cdot 10^3$  |
|       | $k_{nr}^b / \text{s}^{-1}$       | $68,93 \cdot 10^3$ | $40.38 \cdot 10^3$ | $44.72 \cdot 10^3$ |
| 77 K  | $\lambda_{em} / \text{nm}$       | 575                | 570                | 585                |
|       | $\tau / \mu\text{s}$             | 35.5               | 72.8               | 58.0               |
|       | $k_{S1} / \text{s}^{-1}$         | $4.18 \cdot 10^6$  | $12.27 \cdot 10^6$ | $21.16 \cdot 10^6$ |
|       | $k_{T1} / \text{s}^{-1}$         | $2.82 \cdot 10^4$  | $1.37 \cdot 10^4$  | $1.74 \cdot 10^4$  |
|       | $\Delta E_{ST} / \text{cm}^{-1}$ | 656                | 978                | 1129               |
|       | $k_{TADF}^c / \text{s}^{-1}$     | $6.89 \cdot 10^4$  | $3.43 \cdot 10^4$  | $3.30 \cdot 10^4$  |
|       | $\tau_{TADF} / \mu\text{s}$      | 14.52              | 29.11              | 30.29              |

### III. Computational Methods

1. Coordination environment for the gold(I) centers for complexes **1-3** at the ground state  $S_0$ , the first singlet excited state  $S_1$  and the first triplet excited state  $T_1$

**Table S3.** Selected bond lengths (Å) and angles (°) for the coordination environment of the gold(I) centers for complexes **1-3**.

|                          | <b>1</b> |        |        |        | <b>2</b> |        |        | <b>3</b> |        |        |        |
|--------------------------|----------|--------|--------|--------|----------|--------|--------|----------|--------|--------|--------|
|                          | X-Ray    | $S_0$  | $S_1$  | $T_1$  | $S_0$    | $S_1$  | $T_1$  | X-Ray    | $S_0$  | $S_1$  | $T_1$  |
| P1-Au (Å)                | 2.275    | 2.306  | 2.335  | 2.331  | 2.306    | 2.334  | 2.333  | 2.276    | 2.990  | 2.335  | 2.333  |
| P2-Au (Å)                | 2.897    | 3.069  | 2.517  | 2.542  | 3.065    | 2.520  | 2.541  | 2.844    | 2.300  | 2.500  | 2.521  |
| Au-C <sub>ipso</sub> (Å) | 2.048    | 2.077  | 2.068  | 2.067  | 2.077    | 2.069  | 2.069  | 2.043    | 2.086  | 2.072  | 2.072  |
| P1-C1 (Å)                | 1.839    | 1.832  | 1.797  | 1.781  | 1.832    | 1.772  | 1.773  | 1.821    | 1.842  | 1.772  | 1.774  |
| P2-C2 (Å)                | 1.841    | 1.844  | 1.771  | 1.762  | 1.844    | 1.797  | 1.771  | 1.838    | 1.832  | 1.797  | 1.771  |
| C1-C2 (Å)                | 1.394    | 1.408  | 1.425  | 1.453  | 1.408    | 1.425  | 1.449  | 1.417    | 1.409  | 1.426  | 1.450  |
| C1-C3 (Å)                | 1.392    | 1.393  | 1.373  | 1.382  | 1.393    | 1.417  | 1.396  | 1.392    | 1.395  | 1.416  | 1.392  |
| C2-C4 (Å)                | 1.400    | 1.395  | 1.417  | 1.393  | 1.395    | 1.373  | 1.381  | 1.401    | 1.393  | 1.372  | 1.383  |
| P1-Au-P2 (°)             | 76.98    | 75.38  | 80.89  | 80.70  | 75.54    | 80.93  | 80.82  | 78.11    | 77.05  | 81.02  | 80.79  |
| P1-Au-C1 (°)             | 170.23   | 175.37 | 169.01 | 171.67 | 175.48   | 169.87 | 172.17 | 162.55   | 178.56 | 167.50 | 168.77 |
| P2-Au-C1 (°)             | 111.92   | 108.68 | 110.9  | 107.61 | 108.12   | 109.19 | 107.01 | 119.34   | 103.96 | 111.29 | 109.93 |

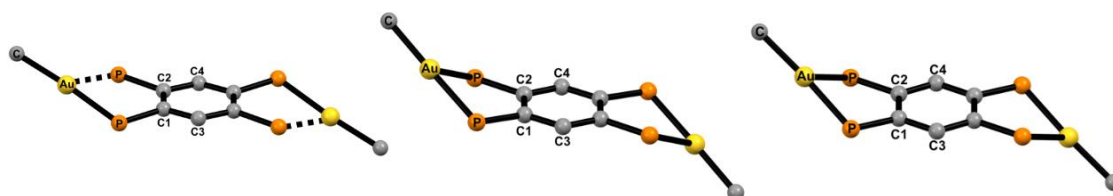

**Figure S32.** Computed coordination environment for the gold(I) center for complex **2** in the ground state  $S_0$  (left), in the first singlet excited state  $S_1$  (middle) and in the first triplet excited state  $T_1$  (right).

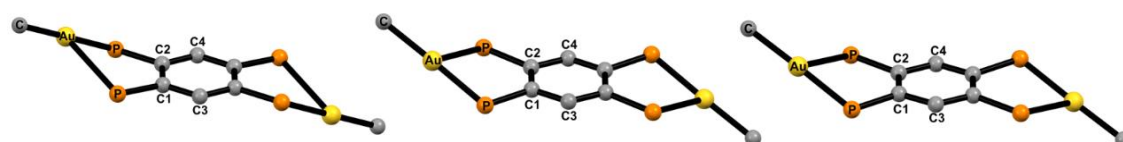

**Figure S33.** Computed coordination environment for the gold(I) center for complex **3** in the ground state  $S_0$  (left), in the first singlet excited state  $S_1$  (middle) and in the first triplet excited state  $T_1$  (right).

1. Frontier HOMO and LUMO for complexes 1-3.

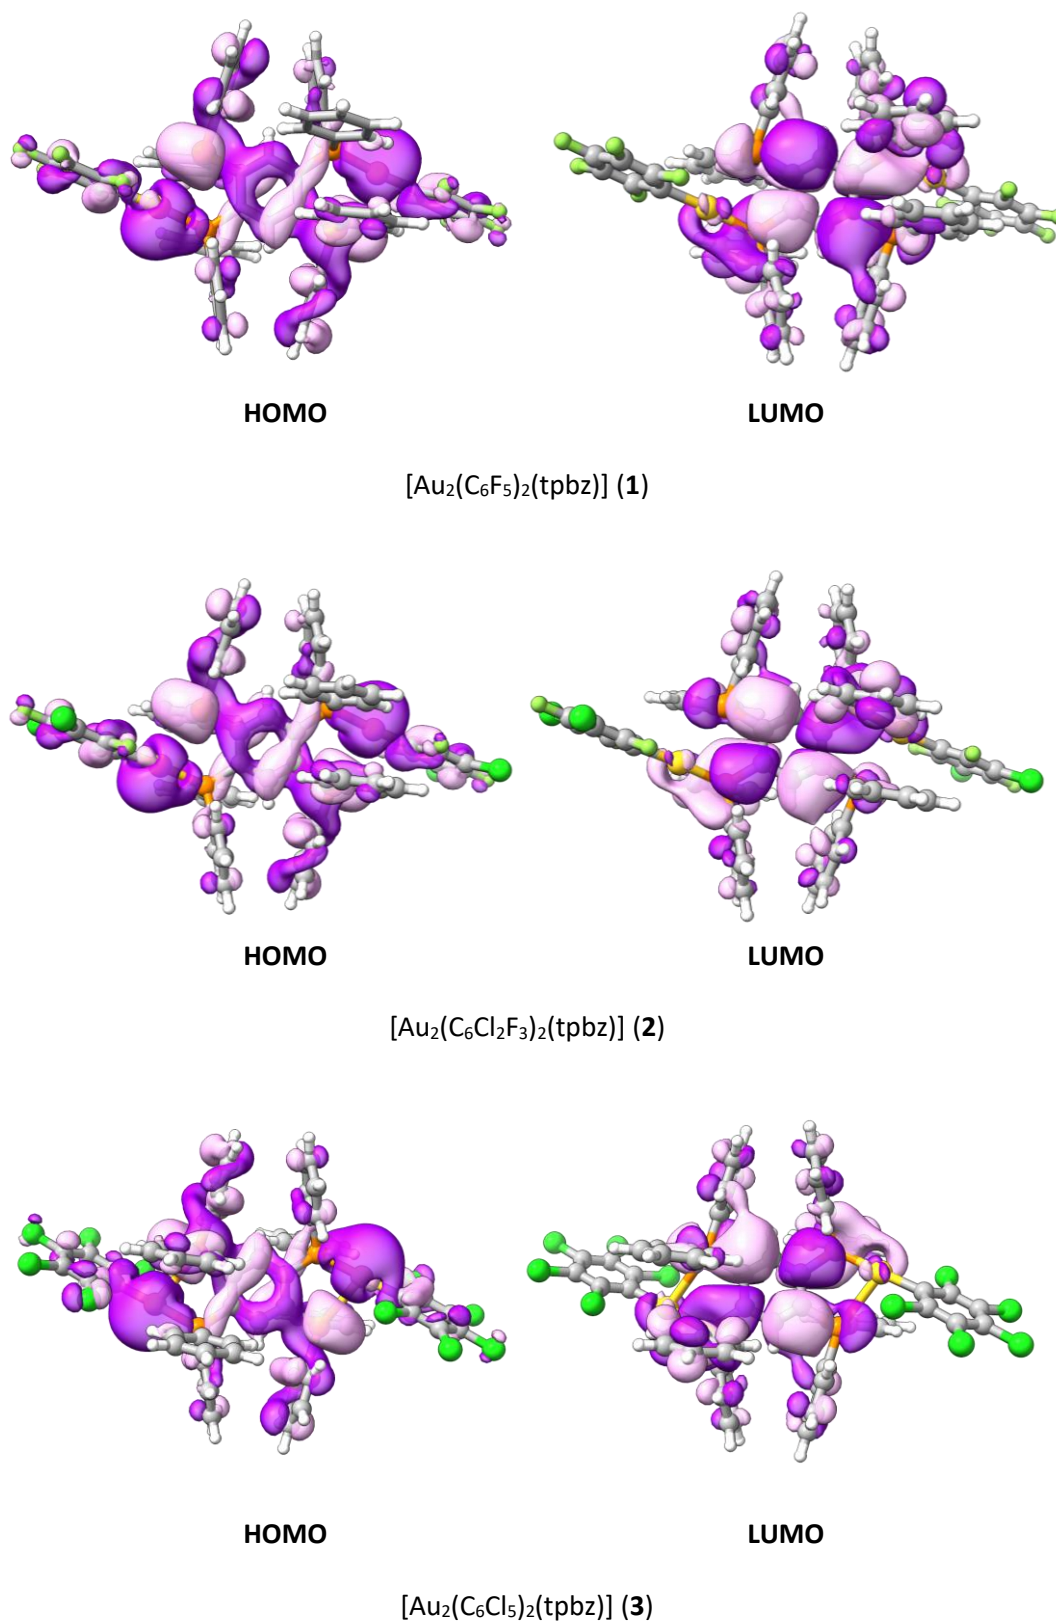

**Figure S34.** The orbitals obtained in the DFT/B3LYP-D3(BJ) calculation that correspond to the HOMO (left) and the LUMO (right) of complexes 1-3.

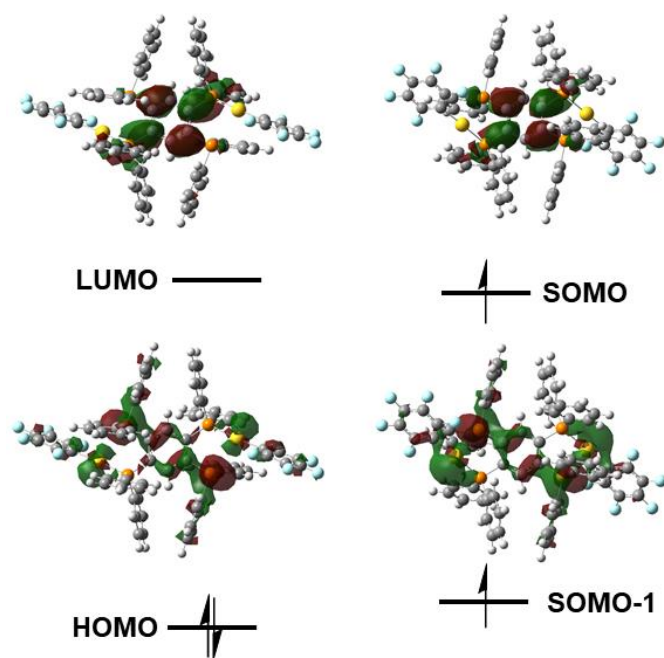

**Figure S35.** The frontier molecular orbitals obtained in the DFT/B3LYP-D3(BJ) calculation that correspond to the HOMO and LUMO of the  $S_0$  state and the SOMO and SOMO-1 of the  $T_1$  state of model **1a**.

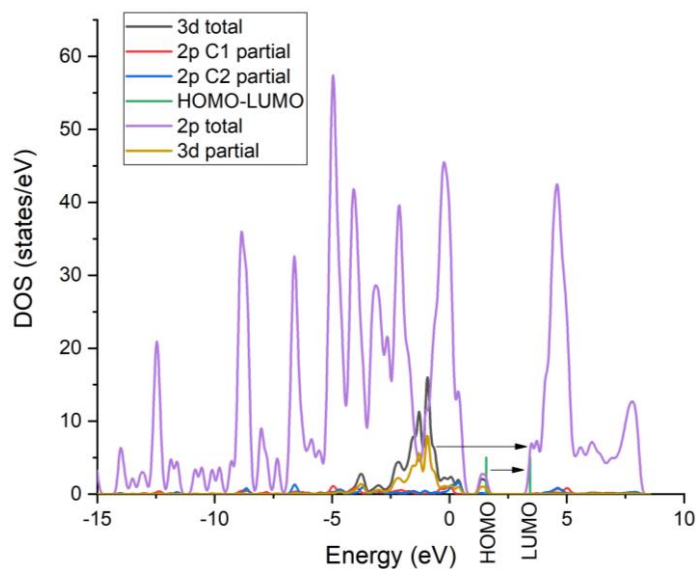

**Figure S36.** Calculated partial densities of states (DOS) of complex **1**, by PBE-GGA method. The vertical lines correspond to the HOMO and LUMO eigenvalues in the DOS.



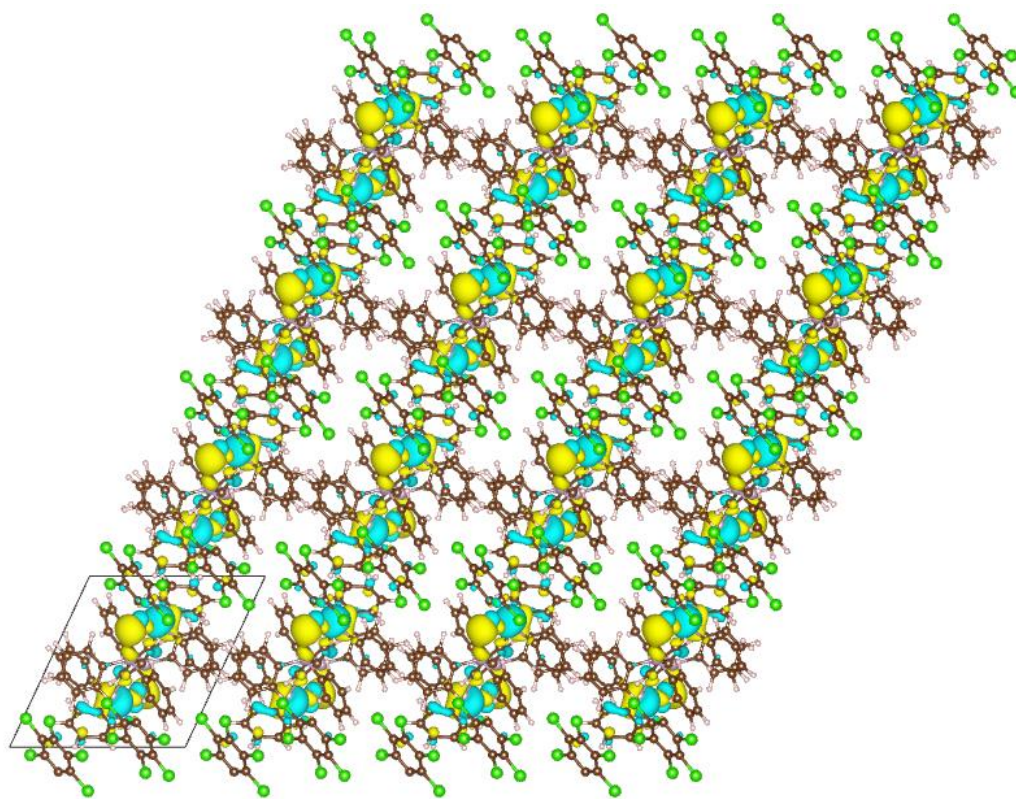

HOMO

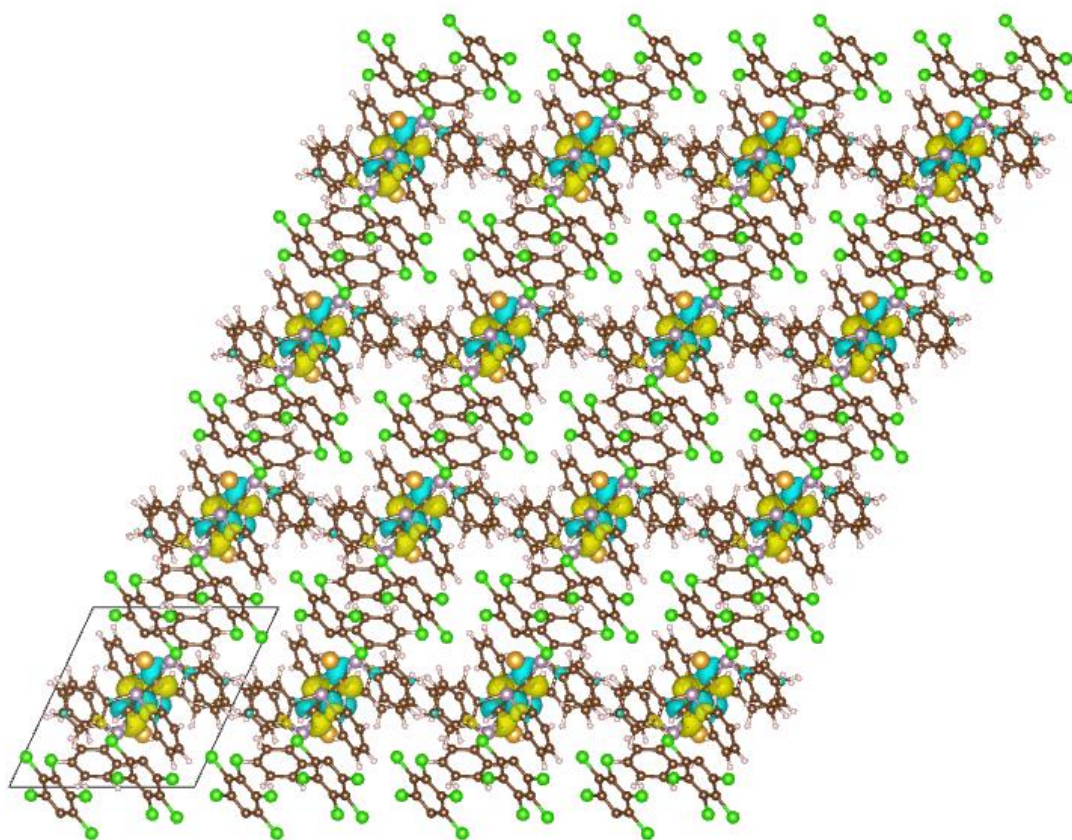

LUMO

**Figure S37.** Frontier MOs for extended model system **1** through periodic-DFT calculations.

2. Transition density calculations for complexes **1-3**.

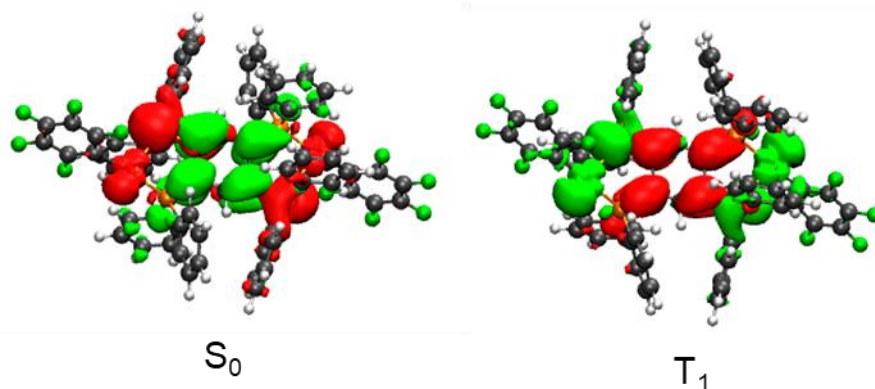

**Figure S38.** Transition densities for complex  $[\text{Au}_2(\text{C}_6\text{F}_5)_2(\text{tpbz})]$  (**1**). (During the transition the electron density increases in the green areas and decreases in the red).

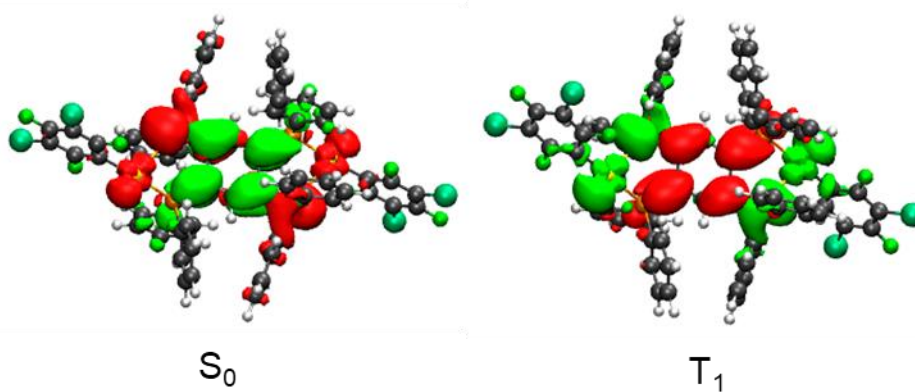

**Figure S39.** Transition densities for complex  $[\text{Au}_2(\text{C}_6\text{Cl}_2\text{F}_3)_2(\text{tpbz})]$  (**2**). (During the transition the electron density increases in the green areas and decreases in the red).

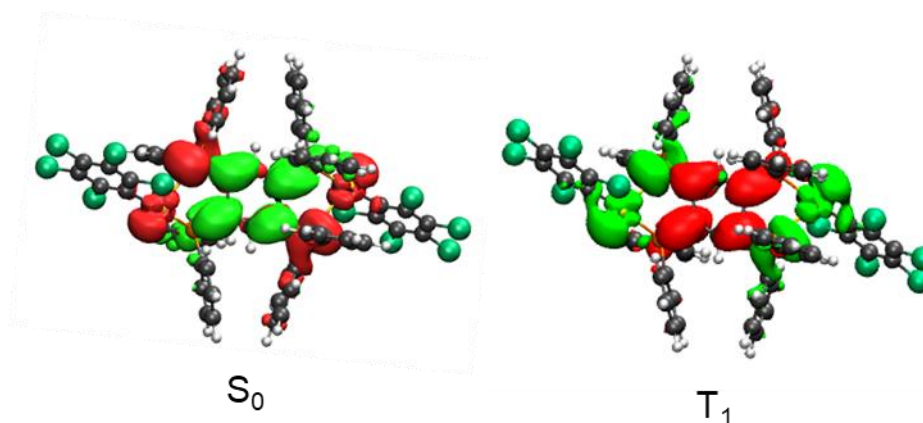

**Figure S40.** Transition densities for complex  $[\text{Au}_2(\text{C}_6\text{Cl}_5)_2(\text{tpbz})]$  (**3**). (During the transition the electron density increases in the green areas and decreases in the red).



3. Electrostatic Potential Surface (ESP) calculations for complexes **2** and **3**.

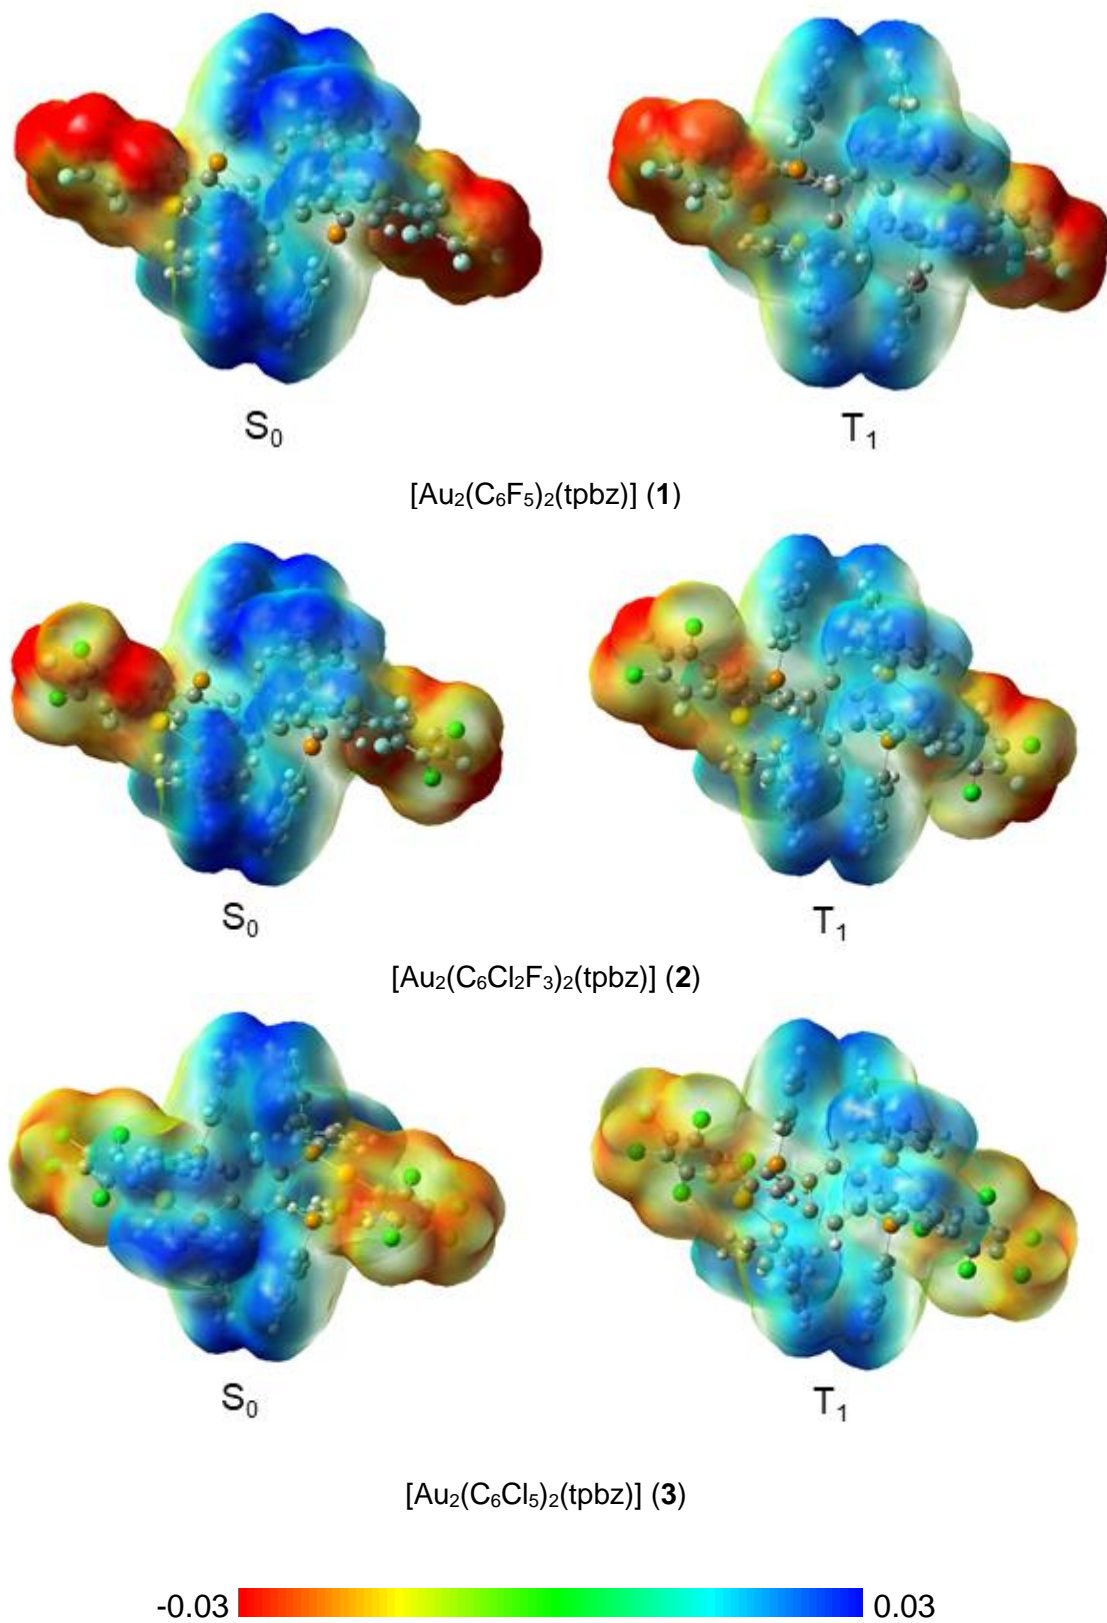

**Figure S41.** Electrostatic Potential Surface (ESP) for model systems **1-3**.

#### 4. TD-DFT Calculations for complexes **2** and **3**.

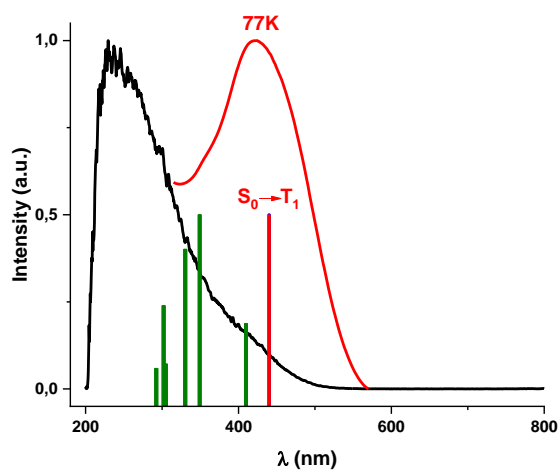

**Figure S42.** Absorption spectrum in solid state (black), excitation spectrum in solid state at 77 K (red), theoretical singlet excitations (green) and first triplet excitation (red line) for complex **2**.

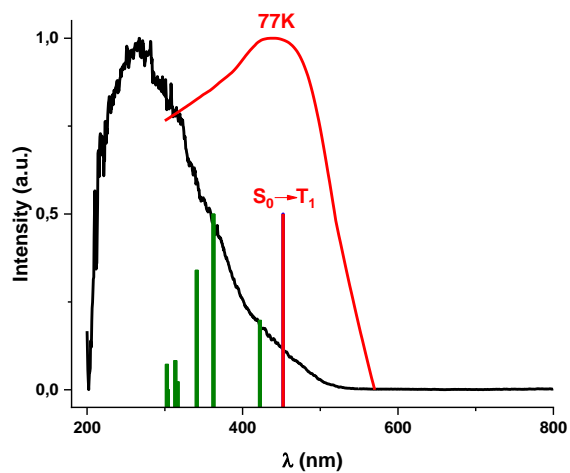

**Figure S43.** Absorption spectrum in solid state (black), excitation spectrum in solid state at 77 K (red), theoretical singlet excitations (green) and first triplet excitation (red line) for complex **3**.



## 5. Population analyses

### Model system 1a

**Table S4.** Population analysis for model system **1a**. Contribution from each part of the molecule to the orbitals involved in the most important transitions (%).

| Orbital | Au <sub>1</sub> | Au <sub>2</sub> | R <sub>1</sub> (C <sub>6</sub> F <sub>5</sub> ) | R <sub>2</sub> (C <sub>6</sub> F <sub>5</sub> ) | P <sub>1</sub> (Ph <sub>2</sub> ) <sub>2</sub> | P <sub>2</sub> (Ph <sub>2</sub> ) <sub>2</sub> | P <sub>3</sub> (Ph <sub>2</sub> ) <sub>2</sub> | P <sub>4</sub> (Ph <sub>2</sub> ) <sub>2</sub> | C <sub>6</sub> H <sub>2</sub> |
|---------|-----------------|-----------------|-------------------------------------------------|-------------------------------------------------|------------------------------------------------|------------------------------------------------|------------------------------------------------|------------------------------------------------|-------------------------------|
| LUMO+8  | 3               | 2               | 7                                               | 7                                               | 23                                             | 20                                             | 19                                             | 12                                             | 6                             |
| LUMO+6  | 1               | 1               | 2                                               | 3                                               | 27                                             | 15                                             | 30                                             | 17                                             | 4                             |
| LUMO+5  | 1               | 1               | 3                                               | 3                                               | 39                                             | 9                                              | 35                                             | 7                                              | 1                             |
| LUMO+4  | 2               | 2               | 2                                               | 2                                               | 21                                             | 25                                             | 21                                             | 25                                             | 2                             |
| LUMO+3  | 1               | 1               | 1                                               | 1                                               | 27                                             | 14                                             | 26                                             | 13                                             | 16                            |
| LUMO+2  | 1               | 1               | 2                                               | 2                                               | 37                                             | 8                                              | 38                                             | 8                                              | 3                             |
| LUMO+1  | 1               | 2               | 2                                               | 2                                               | 17                                             | 9                                              | 19                                             | 10                                             | 38                            |
| LUMO    | 1               | 1               | 0                                               | 0                                               | 14                                             | 5                                              | 13                                             | 5                                              | 60                            |
| HOMO    | 14              | 14              | 4                                               | 4                                               | 3                                              | 26                                             | 3                                              | 25                                             | 9                             |
| HOMO-1  | 18              | 18              | 7                                               | 7                                               | 1                                              | 22                                             | 1                                              | 22                                             | 5                             |
| HOMO-6  | 18              | 16              | 8                                               | 7                                               | 1                                              | 23                                             | 1                                              | 19                                             | 7                             |

### Model system 2a

**Table S5.** Population analysis for model system **2a**. Contribution from each part of the molecule to the orbitals involved in the most important transitions (%).

| Orbital | Au <sub>1</sub> | Au <sub>2</sub> | R <sub>1</sub> (C <sub>6</sub> Cl <sub>2</sub> F <sub>3</sub> ) | R <sub>2</sub> (C <sub>6</sub> Cl <sub>2</sub> F <sub>3</sub> ) | P <sub>1</sub> (Ph <sub>2</sub> ) <sub>2</sub> | P <sub>2</sub> (Ph <sub>2</sub> ) <sub>2</sub> | P <sub>3</sub> (Ph <sub>2</sub> ) <sub>2</sub> | P <sub>4</sub> (Ph <sub>2</sub> ) <sub>2</sub> | C <sub>6</sub> H <sub>2</sub> |
|---------|-----------------|-----------------|-----------------------------------------------------------------|-----------------------------------------------------------------|------------------------------------------------|------------------------------------------------|------------------------------------------------|------------------------------------------------|-------------------------------|
| LUMO+9  | 0               | 0               | 0                                                               | 0                                                               | 33                                             | 10                                             | 35                                             | 9                                              | 13                            |
| LUMO+6  | 1               | 1               | 0                                                               | 0                                                               | 27                                             | 19                                             | 28                                             | 19                                             | 4                             |
| LUMO+4  | 1               | 1               | 0                                                               | 0                                                               | 15                                             | 32                                             | 15                                             | 32                                             | 2                             |
| LUMO+3  | 1               | 1               | 1                                                               | 1                                                               | 31                                             | 13                                             | 31                                             | 13                                             | 9                             |
| LUMO+1  | 1               | 1               | 1                                                               | 1                                                               | 15                                             | 10                                             | 15                                             | 10                                             | 47                            |
| LUMO    | 1               | 1               | 0                                                               | 0                                                               | 14                                             | 5                                              | 14                                             | 5                                              | 61                            |
| HOMO    | 11              | 11              | 5                                                               | 5                                                               | 3                                              | 26                                             | 3                                              | 26                                             | 10                            |
| HOMO-1  | 13              | 13              | 11                                                              | 11                                                              | 1                                              | 22                                             | 1                                              | 22                                             | 5                             |
| HOMO-6  | 12              | 11              | 0                                                               | 0                                                               | 8                                              | 26                                             | 8                                              | 25                                             | 11                            |
| HOMO-8  | 7               | 7               | 10                                                              | 10                                                              | 15                                             | 12                                             | 15                                             | 12                                             | 12                            |

### Model system 3a

**Table S6.** Population analysis for model system **3a**. Contribution from each part of the molecule to the orbitals involved in the most important transitions (%).

| Orbital | Au <sub>1</sub> | Au <sub>2</sub> | R <sub>1</sub> (C <sub>6</sub> Cl <sub>5</sub> ) | R <sub>2</sub> (C <sub>6</sub> F <sub>5</sub> ) | P <sub>1</sub> (Ph <sub>2</sub> ) <sub>2</sub> | P <sub>2</sub> (Ph <sub>2</sub> ) <sub>2</sub> | P <sub>3</sub> (Ph <sub>2</sub> ) <sub>2</sub> | P <sub>4</sub> (Ph <sub>2</sub> ) <sub>2</sub> | C <sub>6</sub> H <sub>2</sub> |
|---------|-----------------|-----------------|--------------------------------------------------|-------------------------------------------------|------------------------------------------------|------------------------------------------------|------------------------------------------------|------------------------------------------------|-------------------------------|
| LUMO+9  | 0               | 0               | 0                                                | 0                                               | 34                                             | 9                                              | 34                                             | 9                                              | 12                            |
| LUMO+6  | 1               | 1               | 0                                                | 0                                               | 29                                             | 18                                             | 29                                             | 18                                             | 4                             |
| LUMO+3  | 1               | 1               | 1                                                | 1                                               | 31                                             | 13                                             | 31                                             | 13                                             | 9                             |
| LUMO+2  | 1               | 1               | 1                                                | 1                                               | 40                                             | 7                                              | 40                                             | 7                                              | 3                             |
| LUMO+1  | 1               | 1               | 1                                                | 1                                               | 14                                             | 10                                             | 14                                             | 10                                             | 47                            |
| LUMO    | 1               | 1               | 0                                                | 0                                               | 14                                             | 5                                              | 14                                             | 5                                              | 61                            |
| HOMO    | 11              | 11              | 4                                                | 4                                               | 3                                              | 26                                             | 3                                              | 26                                             | 10                            |
| HOMO-1  | 14              | 14              | 10                                               | 10                                              | 1                                              | 22                                             | 1                                              | 22                                             | 5                             |
| HOMO-6  | 12              | 12              | 0                                                | 0                                               | 7                                              | 26                                             | 7                                              | 26                                             | 10                            |
| HOMO-8  | 6               | 6               | 11                                               | 11                                              | 16                                             | 10                                             | 16                                             | 10                                             | 12                            |

6. TD-DFT singlet excitation calculations for models **1a-3a**.

**Table S7.** TD-DFT singlet-singlet excitation calculations for model system **1a**.

| [Au <sub>2</sub> (C <sub>6</sub> F <sub>5</sub> ) <sub>2</sub> (tpbz)] ( <b>1a</b> ) |        |                     |                                                               |
|--------------------------------------------------------------------------------------|--------|---------------------|---------------------------------------------------------------|
| Transition                                                                           | λ/nm   | Oscillator strength | Contributions                                                 |
| S <sub>0</sub> -S <sub>1</sub>                                                       | 409.57 | 0.0597              | HOMO→LUMO (98%)                                               |
| S <sub>0</sub> -S <sub>3</sub>                                                       | 349.10 | 0.1429              | HOMO→LUMO+1 (94%)                                             |
| S <sub>0</sub> -S <sub>5</sub>                                                       | 330.42 | 0.1225              | HOMO→LUMO+3 (91%)                                             |
| S <sub>0</sub> -S <sub>12</sub>                                                      | 304.75 | 0.0274              | HOMO→LUMO+4 (11%)<br>HOMO→LUMO+6 (55%)                        |
| S <sub>0</sub> -S <sub>16</sub>                                                      | 301.86 | 0.0771              | HOMO-6→LUMO (88%)                                             |
| S <sub>0</sub> -S <sub>18</sub>                                                      | 291.88 | 0.0143              | HOMO-8→LUMO (27%)<br>HOMO-1→LUMO+4 (17%)<br>HOMO→LUMO+9 (20%) |

**Table S8.** TD-DFT singlet-singlet excitation calculations for model system **2a**.

| [Au <sub>2</sub> (C <sub>6</sub> Cl <sub>2</sub> F <sub>3</sub> ) <sub>2</sub> (tpbz)] ( <b>2a</b> ) |        |                     |                                        |
|------------------------------------------------------------------------------------------------------|--------|---------------------|----------------------------------------|
| Transition                                                                                           | λ/nm   | Oscillator strength | Contributions                          |
| S <sub>0</sub> -S <sub>1</sub>                                                                       | 409.86 | 0.0606              | HOMO→LUMO (98%)                        |
| S <sub>0</sub> -S <sub>3</sub>                                                                       | 349.19 | 0.1518              | HOMO→LUMO+1 (94%)                      |
| S <sub>0</sub> -S <sub>5</sub>                                                                       | 330.37 | 0.1228              | HOMO→LUMO+3 (91%)                      |
| S <sub>0</sub> -S <sub>12</sub>                                                                      | 304.92 | 0.0268              | HOMO→LUMO+6 (68%)                      |
| S <sub>0</sub> -S <sub>14</sub>                                                                      | 304.33 | 0.0059              | HOMO-1→LUMO+2 (83%)                    |
| S <sub>0</sub> -S <sub>16</sub>                                                                      | 302.09 | 0.0756              | HOMO-6→LUMO (87%)                      |
| S <sub>0</sub> -S <sub>18</sub>                                                                      | 292.45 | 0.0231              | HOMO-8→LUMO (54%)<br>HOMO→LUMO+9 (14%) |

**Table S9.** TD-DFT singlet-singlet excitation calculations for model system **3a**.

| [Au <sub>2</sub> (C <sub>6</sub> Cl <sub>5</sub> ) <sub>2</sub> (tpbz)] ( <b>3a</b> ) |        |                     |                                                               |
|---------------------------------------------------------------------------------------|--------|---------------------|---------------------------------------------------------------|
| Transition                                                                            | λ/nm   | Oscillator strength | Contributions                                                 |
| S <sub>0</sub> -S <sub>1</sub>                                                        | 422.42 | 0.0662              | HOMO→LUMO (99%)                                               |
| S <sub>0</sub> -S <sub>3</sub>                                                        | 362.57 | 0.1556              | HOMO→LUMO+1 (92%)                                             |
| S <sub>0</sub> -S <sub>5</sub>                                                        | 314.13 | 0.1083              | HOMO→LUMO+3 (89%)                                             |
| S <sub>0</sub> -S <sub>8</sub>                                                        | 316.47 | 0.0144              | HOMO-1→LUMO+2 (86%)                                           |
| S <sub>0</sub> -S <sub>14</sub>                                                       | 313.45 | 0.0323              | HOMO→LUMO+6 (60%)<br>HOMO→LUMO+5 (43%)                        |
| S <sub>0</sub> -S <sub>16</sub>                                                       | 304.03 | 0.0077              | HOMO-1→LUMO+4 (36%)<br>HOMO→LUMO+6 (26%)<br>HOMO→LUMO+8 (11%) |
| S <sub>0</sub> -S <sub>18</sub>                                                       | 302.69 | 0.0292              | HOMO-6→LUMO (92%)                                             |

## 7. Excitation energies (eV)

**Table S10.** Excitation energies (eV) of the  $S_1$ ,  $S_2$ , and  $T_1$  states of **1a-3a** calculated at the TDDFT/PBE0/def2-TZVP level.

| State/structure | 1a    | 2a    | 3a    |
|-----------------|-------|-------|-------|
| $T_1/S_0$       | 2.713 | 2.711 | 2.633 |
| $T_2/S_0$       | 3.161 | 3.157 | 3.033 |
| $S_1/S_0$       | 2.983 | 2.981 | 2.887 |
| $S_2/S_0$       | 3.342 | 3.338 | 3.210 |
| $T_1/S_1$       | 1.501 | 1.498 | 1.513 |
| $T_2/S_1$       | 1.699 | 1.698 | 1.686 |
| $S_1/S_1$       | 1.654 | 1.654 | 1.663 |
| $S_2/S_1$       | 1.893 | 1.893 | 1.882 |
| $T_1/T_1$       | 1.478 | 1.453 | 1.492 |
| $T_2/T_1$       | 1.730 | 1.709 | 1.708 |
| $S_1/T_1$       | 1.773 | 1.706 | 1.734 |
| $S_2/T_1$       | 2.095 | 2.023 | 2.026 |

**Table S11.** Excitation energies (eV) of the  $S_1$ ,  $S_2$ , and  $T_1$  states of **1a-3a** calculated at the ADC(2)/def2-SVP level.

| State/structure | 1a    | 2a    | 3a    |
|-----------------|-------|-------|-------|
| $T_1/S_0$       | 3.593 | 3.584 | 3.482 |
| $T_2/S_0$       | 3.956 | 3.950 | 3.887 |
| $S_1/S_0$       | 3.793 | 3.781 | 3.648 |
| $S_2/S_0$       | 4.260 | 4.237 | 4.040 |
| $T_1/S_1$       | 2.087 | 2.087 | 2.037 |
| $T_2/S_1$       | 2.308 | 2.308 | 2.228 |
| $S_1/S_1$       | 2.112 | 2.088 | 2.057 |
| $S_2/S_1$       | 2.349 | 2.325 | 2.268 |
| $T_1/T_1$       | 2.027 | 1.989 | 1.988 |
| $T_2/T_1$       | 2.314 | 2.274 | 2.234 |
| $S_1/T_1$       | 2.086 | 2.032 | 2.023 |
| $S_2/T_1$       | 2.398 | 2.341 | 2.301 |

8. Representation of DFT optimized complexes **1-3** in the  $S_0$  state (B3LYP functional)

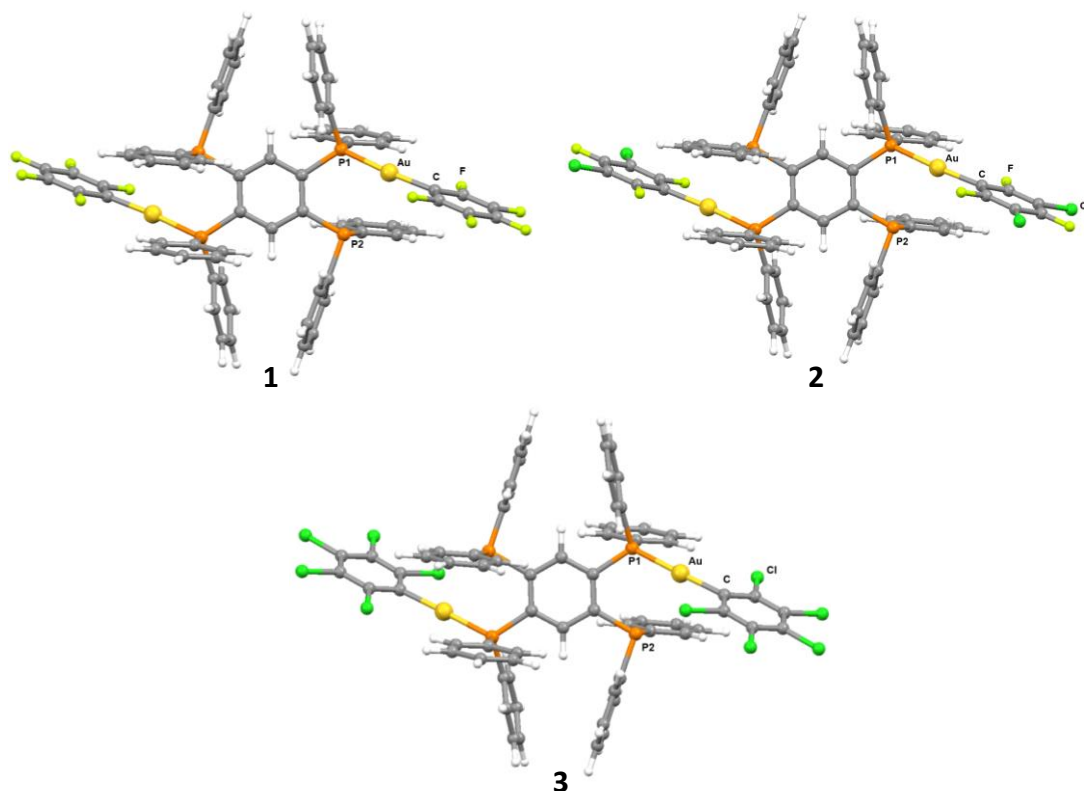

**Figure S44.** Model Systems of complexes **1-3** in the ground state  $S_0$ .

9. xyz coordinates for models **1a-3a** in the  $S_0$  state (B3LYP functional)

124

**Model\_1**  $S_0$

|    |              |             |             |
|----|--------------|-------------|-------------|
| Au | -4.73265000  | 0.78489900  | 0.39529900  |
| P  | -2.70703400  | 1.78863300  | -0.18503700 |
| P  | 2.87932400   | 1.57230400  | 0.31795600  |
| F  | -6.06694200  | -0.59191000 | 3.00031200  |
| F  | -8.50239500  | -1.65689200 | 3.42418000  |
| F  | -10.36780200 | -1.64032200 | 1.44543100  |
| F  | -9.77501500  | -0.54370900 | -0.97444700 |
| F  | -7.34891300  | 0.52936800  | -1.41770500 |
| C  | -6.61233700  | 0.02176800  | 0.77922200  |
| C  | -6.96064300  | -0.55222800 | 1.99358000  |
| C  | -8.20827600  | -1.11232500 | 2.24001300  |
| C  | -9.16506200  | -1.10679900 | 1.23183500  |
| C  | -8.85863600  | -0.54428500 | -0.00118300 |
| C  | -7.59803000  | 0.00536800  | -0.19743400 |
| C  | -1.19065200  | 0.73207000  | -0.04401500 |
| C  | 0.03869800   | 1.36701700  | 0.14390500  |
| H  | 0.05491900   | 2.44803600  | 0.27249900  |

|   |             |             |             |
|---|-------------|-------------|-------------|
| C | 1.24756800  | 0.66637500  | 0.18655000  |
| C | -2.69647700 | 2.35504600  | -1.93513900 |
| C | -3.91374400 | 2.41796100  | -2.61946500 |
| H | -4.83435100 | 2.11318900  | -2.11763700 |
| C | -3.94461700 | 2.84095900  | -3.94607500 |
| H | -4.89790400 | 2.87486800  | -4.47755300 |
| C | -2.76511400 | 3.19976100  | -4.59328700 |
| H | -2.79024800 | 3.52547800  | -5.63601900 |
| C | -1.54861400 | 3.13594500  | -3.91276600 |
| H | -0.62077600 | 3.41400300  | -4.41854100 |
| C | -1.51116900 | 2.71446900  | -2.58733900 |
| H | -0.55438300 | 2.66367600  | -2.06585700 |
| C | -2.30552400 | 3.26601600  | 0.83669800  |
| C | -2.19771500 | 3.08415700  | 2.22163300  |
| H | -2.31306500 | 2.08540600  | 2.65064900  |
| C | -1.95907100 | 4.17379400  | 3.05111700  |
| H | -1.87515700 | 4.02568100  | 4.13019400  |
| C | -1.84474200 | 5.45365600  | 2.50665400  |
| H | -1.66720800 | 6.31114500  | 3.15993200  |
| C | -1.95799100 | 5.63619900  | 1.13196700  |
| H | -1.86366400 | 6.63537300  | 0.70143600  |
| C | -2.18365200 | 4.54542000  | 0.29332100  |
| H | -2.26615000 | 4.69475400  | -0.78385700 |
| C | 2.28380100  | 3.33180100  | 0.39728500  |
| C | 2.15093400  | 4.00001500  | -0.82736500 |
| H | 2.40406700  | 3.47888100  | -1.75528100 |
| C | 1.70546000  | 5.31888700  | -0.87020800 |
| H | 1.60048500  | 5.82746700  | -1.83178500 |
| C | 1.41208500  | 5.99138300  | 0.31482500  |
| H | 1.07057600  | 7.02873500  | 0.28554000  |
| C | 1.55860900  | 5.33915300  | 1.53729700  |
| H | 1.32491600  | 5.86209600  | 2.46721600  |
| C | 1.98816200  | 4.01477200  | 1.58133900  |
| H | 2.09116300  | 3.50871600  | 2.54254700  |
| C | 3.32676800  | 1.20531400  | 2.08055300  |
| C | 2.39706600  | 0.83186400  | 3.05791000  |
| H | 1.33716900  | 0.76562200  | 2.80569600  |
| C | 2.81964500  | 0.52311100  | 4.34792600  |
| H | 2.08772600  | 0.21636200  | 5.09859400  |
| C | 4.17385200  | 0.58201500  | 4.67357400  |
| H | 4.50413000  | 0.32476500  | 5.68281800  |
| C | 5.10704100  | 0.95101800  | 3.70655700  |
| H | 6.17189300  | 0.98283700  | 3.94760500  |
| C | 4.68532600  | 1.25781900  | 2.41543500  |
| H | 5.41977500  | 1.52396700  | 1.65338800  |
| P | 2.70753900  | -1.78945700 | 0.18945900  |
| P | -2.87905100 | -1.57311800 | -0.32318800 |

|   |             |             |             |
|---|-------------|-------------|-------------|
| C | 1.19090900  | -0.73405200 | 0.04388300  |
| C | -0.03836300 | -1.36909500 | -0.14464500 |
| H | -0.05463300 | -2.45022400 | -0.27278300 |
| C | -1.24716600 | -0.66820800 | -0.18820000 |
| C | 2.69604100  | -2.34766400 | 1.94219800  |
| C | 3.91336900  | -2.41030400 | 2.62648600  |
| H | 4.83458300  | -2.11018300 | 2.12296400  |
| C | 3.94359400  | -2.82699000 | 3.95508500  |
| H | 4.89694800  | -2.86066300 | 4.48645800  |
| C | 2.76339800  | -3.17977000 | 4.60437800  |
| H | 2.78806000  | -3.50051800 | 5.64865900  |
| C | 1.54685000  | -3.11607800 | 3.92398700  |
| H | 0.61847200  | -3.38922900 | 4.43143800  |
| C | 1.51005700  | -2.70079800 | 2.59656200  |
| H | 0.55321800  | -2.64954700 | 2.07517500  |
| C | 2.30809900  | -3.27136000 | -0.82633300 |
| C | 2.21289600  | -3.09692300 | -2.21314000 |
| H | 2.33775700  | -2.10134900 | -2.64686700 |
| C | 1.97532700  | -4.19006000 | -3.03833700 |
| H | 1.90142700  | -4.04777300 | -4.11892800 |
| C | 1.84961100  | -5.46609200 | -2.48749800 |
| H | 1.67299400  | -6.32641500 | -3.13728800 |
| C | 1.95034600  | -5.64129800 | -1.11087200 |
| H | 1.84712700  | -6.63744500 | -0.67545200 |
| C | 2.17475600  | -4.54692400 | -0.27662000 |
| H | 2.24762600  | -4.69051700 | 0.80202700  |
| C | -2.28555000 | -3.33293800 | -0.41013200 |
| C | -2.15808500 | -4.00823800 | 0.81117900  |
| H | -2.41227400 | -3.49145000 | 1.74123300  |
| C | -1.71735200 | -5.32890200 | 0.84797800  |
| H | -1.61699400 | -5.84316500 | 1.80702400  |
| C | -1.42312600 | -5.99589500 | -0.33991200 |
| H | -1.08564400 | -7.03468800 | -0.31542400 |
| C | -1.56355100 | -5.33632100 | -1.55916800 |
| H | -1.32896100 | -5.85493800 | -2.49129900 |
| C | -1.98853900 | -4.01030900 | -1.59709700 |
| H | -2.08739600 | -3.49874100 | -2.55581700 |
| C | -3.32596500 | -1.19852700 | -2.08439900 |
| C | -2.39598200 | -0.82121900 | -3.06001200 |
| H | -1.33615500 | -0.75591700 | -2.80725900 |
| C | -2.81816200 | -0.50747200 | -4.34896100 |
| H | -2.08600300 | -0.19780800 | -5.09819800 |
| C | -4.17225500 | -0.56515100 | -4.67526400 |
| H | -4.50222400 | -0.30400300 | -5.68360500 |
| C | -5.10573600 | -0.93790900 | -3.70996100 |
| H | -6.17051400 | -0.96881000 | -3.95145700 |
| C | -4.68442100 | -1.24974600 | -2.41991900 |

|    |             |             |             |
|----|-------------|-------------|-------------|
| H  | -5.41910200 | -1.51895100 | -1.65916800 |
| Au | 4.73301700  | -0.78677800 | -0.39347200 |
| F  | 6.06818300  | 0.58048000  | -3.00315200 |
| F  | 8.50391800  | 1.64353400  | -3.43021800 |
| F  | 10.36874600 | 1.63397300  | -1.45086500 |
| F  | 9.77508500  | 0.54633000  | 0.97284500  |
| F  | 7.34871200  | -0.52477900 | 1.41931600  |
| C  | 6.61281700  | -0.02507400 | -0.77965500 |
| C  | 6.96157800  | 0.54439800  | -1.99600400 |
| C  | 8.20937400  | 1.10338600  | -2.24413700 |
| C  | 9.16586400  | 1.10142000  | -1.23566700 |
| C  | 8.85898900  | 0.54347900  | -0.00068200 |
| C  | 7.59824500  | -0.00526000 | 0.19721800  |

124

**Model\_2 S0**

|    |             |             |             |
|----|-------------|-------------|-------------|
| Au | -0.89843700 | -1.90181200 | -4.32752600 |
| P  | -0.32151300 | 0.07661100  | -3.23398900 |
| P  | 1.83431800  | 2.33731200  | 1.42815900  |
| C  | -1.52891300 | -3.53672900 | -5.42213100 |
| C  | -0.13014600 | -0.02549800 | -1.39294400 |
| C  | 0.68157200  | 0.91995600  | -0.76282100 |
| H  | 1.22826600  | 1.63272900  | -1.37795400 |
| C  | 0.82984600  | 0.97781400  | 0.62603200  |
| C  | 3.34620100  | 1.38601400  | 1.93020100  |
| C  | -0.87437800 | -4.76001300 | -5.40608900 |
| C  | 1.27451300  | 0.79796000  | -3.79951900 |
| C  | 2.42897500  | 0.01988600  | -3.64292500 |
| H  | 2.36551000  | -0.95825800 | -3.15918000 |
| C  | -2.69523900 | -3.49464800 | -6.17236000 |
| C  | -1.59290100 | 1.38382400  | -3.47805400 |
| C  | -1.32912100 | -5.88828800 | -6.08577900 |
| C  | 3.65160000  | 0.48417200  | -4.11390700 |
| H  | 4.54850800  | -0.12663200 | -3.98798600 |
| C  | 1.35366900  | 2.03573100  | -4.43885500 |
| H  | 0.45930500  | 2.64721900  | -4.56407500 |
| C  | -1.61495900 | 2.54520000  | -2.69682700 |
| H  | -0.86902900 | 2.70265800  | -1.91661900 |
| C  | 2.40832700  | 3.26471400  | -0.07749600 |
| C  | -2.55979500 | 1.19396900  | -4.46964600 |
| H  | -2.55712800 | 0.27676700  | -5.06202600 |
| C  | -2.50676800 | -5.78653900 | -6.82101400 |
| C  | -3.20741100 | -4.58517500 | -6.87145400 |
| C  | 3.72713100  | 0.16875700  | 1.35379400  |
| H  | 3.13482800  | -0.26059500 | 0.54376700  |
| C  | 2.58062900  | 2.49003200  | -4.92081500 |
| H  | 2.63681300  | 3.45949900  | -5.42049200 |

|   |             |             |             |
|---|-------------|-------------|-------------|
| C | 3.59618000  | 2.99805600  | -0.76564400 |
| H | 4.25101500  | 2.19232700  | -0.43005600 |
| C | -3.56028700 | 3.31622200  | -3.90230200 |
| H | -4.33362300 | 4.07110900  | -4.06390900 |
| C | -2.59701100 | 3.50721400  | -2.91093700 |
| H | -2.61141700 | 4.41142200  | -2.29757600 |
| C | 3.72755300  | 1.71896100  | -4.75969600 |
| H | 4.68695300  | 2.07906100  | -5.13842800 |
| C | 1.58218100  | 4.30668500  | -0.51976200 |
| H | 0.66409700  | 4.53587000  | 0.02913000  |
| C | 3.10819900  | 4.77772900  | -2.32687500 |
| H | 3.38293600  | 5.36527400  | -3.20600300 |
| C | 1.92321000  | 5.05159600  | -1.64607300 |
| H | 1.26789000  | 5.85783700  | -1.98492800 |
| C | 3.94374200  | 3.75534000  | -1.88194900 |
| H | 4.87060300  | 3.53560700  | -2.41617100 |
| C | 4.84855800  | -0.51010800 | 1.82251300  |
| H | 5.12721100  | -1.46770300 | 1.37677400  |
| C | -3.53993600 | 2.16103500  | -4.67942300 |
| H | -4.29916700 | 1.99902800  | -5.44732400 |
| C | 4.10367200  | 1.90765000  | 2.98604900  |
| H | 3.80077200  | 2.84449400  | 3.45673800  |
| C | 5.59848500  | 0.01822700  | 2.87217600  |
| H | 6.46932900  | -0.52423400 | 3.24796100  |
| C | 5.22620600  | 1.22903200  | 3.45324200  |
| H | 5.79730600  | 1.64219400  | 4.28763700  |
| P | 0.32151300  | -0.07661100 | 3.23398900  |
| P | -1.83431800 | -2.33731200 | -1.42815900 |
| C | 0.13014600  | 0.02549800  | 1.39294400  |
| C | -0.68157200 | -0.91995600 | 0.76282100  |
| H | -1.22826600 | -1.63272900 | 1.37795400  |
| C | -0.82984600 | -0.97781400 | -0.62603200 |
| C | -3.34620100 | -1.38601400 | -1.93020100 |
| C | -1.27451300 | -0.79796000 | 3.79951900  |
| C | -2.42897500 | -0.01988600 | 3.64292500  |
| H | -2.36551000 | 0.95825800  | 3.15918000  |
| C | 1.59290100  | -1.38382400 | 3.47805400  |
| C | -3.65160000 | -0.48417200 | 4.11390700  |
| H | -4.54850800 | 0.12663200  | 3.98798600  |
| C | -1.35366900 | -2.03573100 | 4.43885500  |
| H | -0.45930500 | -2.64721900 | 4.56407500  |
| C | 1.61495900  | -2.54520000 | 2.69682700  |
| H | 0.86902900  | -2.70265800 | 1.91661900  |
| C | -2.40832700 | -3.26471400 | 0.07749600  |
| C | 2.55979500  | -1.19396900 | 4.46964600  |
| H | 2.55712800  | -0.27676700 | 5.06202600  |
| C | -3.72713100 | -0.16875700 | -1.35379400 |



|    |             |             |             |
|----|-------------|-------------|-------------|
| H  | -3.13482800 | 0.26059500  | -0.54376700 |
| C  | -2.58062900 | -2.49003200 | 4.92081500  |
| H  | -2.63681300 | -3.45949900 | 5.42049200  |
| C  | -3.59618000 | -2.99805600 | 0.76564400  |
| H  | -4.25101500 | -2.19232700 | 0.43005600  |
| C  | 3.56028700  | -3.31622200 | 3.90230200  |
| H  | 4.33362300  | -4.07110900 | 4.06390900  |
| C  | 2.59701100  | -3.50721400 | 2.91093700  |
| H  | 2.61141700  | -4.41142200 | 2.29757600  |
| C  | -3.72755300 | -1.71896100 | 4.75969600  |
| H  | -4.68695300 | -2.07906100 | 5.13842800  |
| C  | -1.58218100 | -4.30668500 | 0.51976200  |
| H  | -0.66409700 | -4.53587000 | -0.02913000 |
| C  | -3.10819900 | -4.77772900 | 2.32687500  |
| H  | -3.38293600 | -5.36527400 | 3.20600300  |
| C  | -1.92321000 | -5.05159600 | 1.64607300  |
| H  | -1.26789000 | -5.85783700 | 1.98492800  |
| C  | -3.94374200 | -3.75534000 | 1.88194900  |
| H  | -4.87060300 | -3.53560700 | 2.41617100  |
| C  | -4.84855800 | 0.51010800  | -1.82251300 |
| H  | -5.12721100 | 1.46770300  | -1.37677400 |
| C  | 3.53993600  | -2.16103500 | 4.67942300  |
| H  | 4.29916700  | -1.99902800 | 5.44732400  |
| C  | -4.10367200 | -1.90765000 | -2.98604900 |
| H  | -3.80077200 | -2.84449400 | -3.45673800 |
| C  | -5.59848500 | -0.01822700 | -2.87217600 |
| H  | -6.46932900 | 0.52423400  | -3.24796100 |
| C  | -5.22620600 | -1.22903200 | -3.45324200 |
| H  | -5.79730600 | -1.64219400 | -4.28763700 |
| Au | 0.89843700  | 1.90181200  | 4.32752600  |
| C  | 1.52891300  | 3.53672900  | 5.42213100  |
| C  | 0.87437800  | 4.76001300  | 5.40608900  |
| C  | 2.69523900  | 3.49464800  | 6.17236000  |
| C  | 1.32912100  | 5.88828800  | 6.08577900  |
| C  | 2.50676800  | 5.78653900  | 6.82101400  |
| C  | 3.20741100  | 4.58517500  | 6.87145400  |
| F  | -3.39540300 | -2.34509300 | -6.22600900 |
| F  | -2.96805400 | -6.84625000 | -7.47752500 |
| F  | 0.25667000  | -4.88230600 | -4.69310200 |
| F  | 3.39540300  | 2.34509300  | 6.22600900  |
| F  | -0.25667000 | 4.88230600  | 4.69310200  |
| F  | 2.96805400  | 6.84625000  | 7.47752500  |
| Cl | 0.46144000  | 7.40479900  | 6.02551500  |
| Cl | 4.69274200  | 4.47006300  | 7.78765500  |
| Cl | -4.69274200 | -4.47006300 | -7.78765500 |
| Cl | -0.46144000 | -7.40479900 | -6.02551500 |

**Model\_3 S0**

|    |             |             |             |
|----|-------------|-------------|-------------|
| Au | 4.61759400  | -1.01122700 | -0.44836100 |
| Cl | 7.36028600  | -1.86575900 | 1.30732700  |
| Cl | 10.15400200 | -0.43922000 | 1.11234200  |
| Cl | 10.56857000 | 1.94180900  | -0.89898000 |
| Cl | 8.18879200  | 2.89254400  | -2.72117500 |
| Cl | 5.39505500  | 1.45805900  | -2.53360900 |
| P  | 2.53524200  | -2.02665900 | -0.21203400 |
| P  | -2.96243300 | -1.10895400 | -0.92081900 |
| C  | 6.50057400  | -0.15545000 | -0.63645800 |
| C  | 7.58262300  | -0.53949400 | 0.15600300  |
| C  | 8.83273700  | 0.08269300  | 0.09436800  |
| C  | 9.01993700  | 1.14348000  | -0.79903800 |
| C  | 7.95925000  | 1.56324800  | -1.61023300 |
| C  | 6.72940300  | 0.90764800  | -1.51139900 |
| C  | 1.11922800  | -0.83513100 | -0.11088600 |
| C  | -0.13977900 | -1.26235000 | -0.53744800 |
| H  | -0.23613800 | -2.25410200 | -0.97701000 |
| C  | -1.27914800 | -0.45870400 | -0.43471200 |
| C  | 2.37419900  | -3.03971000 | 1.31336300  |
| C  | 3.53988100  | -3.40545100 | 1.99198500  |
| H  | 4.51000000  | -3.07209300 | 1.61893200  |
| C  | 3.45664900  | -4.16918000 | 3.15365400  |
| H  | 4.37051400  | -4.43979600 | 3.68684200  |
| C  | 2.21477400  | -4.56898000 | 3.64064500  |
| H  | 2.15125000  | -5.16310400 | 4.55549000  |
| C  | 1.04983700  | -4.20343300 | 2.96541500  |
| H  | 0.07356400  | -4.51284300 | 3.34659700  |
| C  | 1.12608900  | -3.43914100 | 1.80518400  |
| H  | 0.20940600  | -3.15139500 | 1.28825100  |
| C  | 2.08893100  | -3.12623400 | -1.61794800 |
| C  | 2.15663100  | -2.57983500 | -2.90626600 |
| H  | 2.44084000  | -1.53271400 | -3.03876500 |
| C  | 1.88121900  | -3.37279200 | -4.01439200 |
| H  | 1.93537800  | -2.94149500 | -5.01665600 |
| C  | 1.55608600  | -4.71935000 | -3.84563600 |
| H  | 1.35054300  | -5.34490600 | -4.71743200 |
| C  | 1.49560200  | -5.26458500 | -2.56687500 |
| H  | 1.23600100  | -6.31642700 | -2.43047300 |
| C  | 1.75626700  | -4.47108200 | -1.45052700 |
| H  | 1.70235400  | -4.90367700 | -0.45088700 |
| C  | -2.52857300 | -2.82588200 | -1.48212000 |
| C  | -2.60311700 | -3.83176700 | -0.50917000 |
| H  | -2.90697600 | -3.57344000 | 0.50948700  |
| C  | -2.30683800 | -5.15345900 | -0.83432000 |
| H  | -2.36545900 | -5.92925500 | -0.06682500 |

|   |             |             |             |
|---|-------------|-------------|-------------|
| C | -1.95755500 | -5.48534600 | -2.14223200 |
| H | -1.73542200 | -6.52287100 | -2.40296000 |
| C | -1.89665100 | -4.49241300 | -3.11805100 |
| H | -1.61846500 | -4.74907100 | -4.14254900 |
| C | -2.17624500 | -3.16749400 | -2.79176000 |
| H | -2.11987700 | -2.39488700 | -3.56031700 |
| C | -3.22668100 | -0.19968100 | -2.51562600 |
| C | -2.19143400 | 0.34198900  | -3.28608100 |
| H | -1.15415100 | 0.22090900  | -2.96842000 |
| C | -2.47826600 | 1.05499500  | -4.44698000 |
| H | -1.66357200 | 1.48810600  | -5.03187900 |
| C | -3.80082900 | 1.23330100  | -4.84978500 |
| H | -4.02371100 | 1.80384300  | -5.75462700 |
| C | -4.83820400 | 0.69995600  | -4.08718900 |
| H | -5.87832100 | 0.85018800  | -4.38537500 |
| C | -4.55255000 | -0.00821500 | -2.92281400 |
| H | -5.36788400 | -0.40016000 | -2.31200000 |
| P | -2.53568400 | 2.01826200  | 0.23991300  |
| P | 2.96417900  | 1.11531300  | 0.90479600  |
| C | -1.12009300 | 0.82706400  | 0.11979100  |
| C | 0.13923700  | 1.25438200  | 0.54442800  |
| H | 0.23503500  | 2.24512300  | 0.98587900  |
| C | 1.27955600  | 0.45339000  | 0.43717200  |
| C | -2.37107200 | 3.06599900  | -1.26145300 |
| C | -3.53427000 | 3.43593300  | -1.94189800 |
| H | -4.50433700 | 3.08563100  | -1.58461000 |
| C | -3.44838500 | 4.22610300  | -3.08564700 |
| H | -4.36022900 | 4.50009100  | -3.62057100 |
| C | -2.20628500 | 4.64815800  | -3.55270700 |
| H | -2.14052700 | 5.26314700  | -4.45350500 |
| C | -1.04374600 | 4.27901600  | -2.87507700 |
| H | -0.06722300 | 4.60658900  | -3.24008800 |
| C | -1.12257100 | 3.48864200  | -1.73274500 |
| H | -0.20744200 | 3.20043100  | -1.21349900 |
| C | -2.08652600 | 3.08581300  | 1.66973400  |
| C | -2.11638400 | 2.50152100  | 2.94281300  |
| H | -2.37218400 | 1.44426000  | 3.05034500  |
| C | -1.83769900 | 3.26875100  | 4.06800900  |
| H | -1.86152700 | 2.80772400  | 5.05815000  |
| C | -1.54726100 | 4.62706700  | 3.93235500  |
| H | -1.33891400 | 5.23203600  | 4.81791800  |
| C | -1.52511000 | 5.20982200  | 2.66904800  |
| H | -1.29281900 | 6.27107300  | 2.55818900  |
| C | -1.78915400 | 4.44245600  | 1.53523600  |
| H | -1.76403500 | 4.90430900  | 0.54761000  |
| C | 2.52294200  | 2.84075200  | 1.43369200  |
| C | 2.56306200  | 3.82284700  | 0.43458600  |

|    |              |             |             |
|----|--------------|-------------|-------------|
| H  | 2.85173500   | 3.54354100  | -0.58295300 |
| C  | 2.24897300   | 5.14696600  | 0.73152200  |
| H  | 2.27907300   | 5.90365000  | -0.05642700 |
| C  | 1.91729600   | 5.50619000  | 2.03696000  |
| H  | 1.68058400   | 6.54591400  | 2.27517400  |
| C  | 1.89314300   | 4.53785800  | 3.03865100  |
| H  | 1.62931400   | 4.81570400  | 4.06138400  |
| C  | 2.18968900   | 3.20978700  | 2.74068500  |
| H  | 2.15941400   | 2.45589600  | 3.52901300  |
| C  | 3.23993500   | 0.23800300  | 2.51505700  |
| C  | 2.20985300   | -0.28727300 | 3.30355100  |
| H  | 1.17039100   | -0.17076100 | 2.99130800  |
| C  | 2.50465900   | -0.97783100 | 4.47591200  |
| H  | 1.69399600   | -1.39865200 | 5.07519800  |
| C  | 3.83008200   | -1.14963200 | 4.87230600  |
| H  | 4.05914200   | -1.70260000 | 5.78647600  |
| C  | 4.86227100   | -0.63231900 | 4.09191100  |
| H  | 5.90441800   | -0.77772300 | 4.38534600  |
| C  | 4.56859900   | 0.05324500  | 2.91601900  |
| H  | 5.37966400   | 0.43230300  | 2.29156100  |
| Au | -4.61941100  | 1.00131400  | 0.45406000  |
| Cl | -7.35694600  | 1.88269800  | -1.29581300 |
| Cl | -10.15104100 | 0.45303300  | -1.13135900 |
| Cl | -10.57110000 | -1.95935300 | 0.84108200  |
| Cl | -8.19652900  | -2.93831000 | 2.65505900  |
| Cl | -5.40271500  | -1.50044700 | 2.49871800  |
| C  | -6.50281000  | 0.14256400  | 0.62379200  |
| C  | -7.58254000  | 0.53869800  | -0.16588300 |
| C  | -8.83271100  | -0.08455700 | -0.11775100 |
| C  | -9.02234900  | -1.15927300 | 0.75832300  |
| C  | -7.96399000  | -1.59154000 | 1.56597000  |
| C  | -6.73401300  | -0.93420000 | 1.48121800  |

10. Representation of DFT optimized complexes **1-3** in the T<sub>1</sub> state (B3LYP functional)

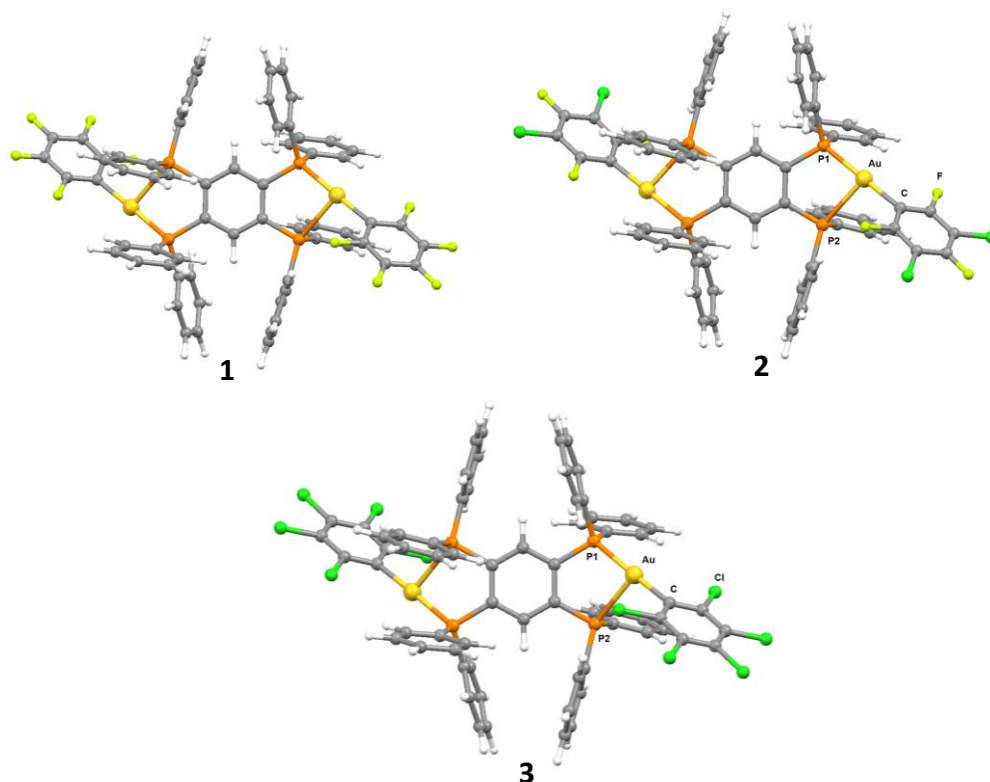

**Figure S45.** Model Systems of complexes **1-3** in the ground state T<sub>1</sub>.

11. xyz coordinates for models **1a-3a** in the T<sub>1</sub> state (B3LYP functional)

124

**Model\_1 T1**

|    |             |             |             |
|----|-------------|-------------|-------------|
| Au | -1.03006500 | -1.78378400 | -4.01712900 |
| P  | -0.40627600 | 0.33698100  | -3.18824300 |
| P  | 2.08055700  | 1.91050300  | 1.54906400  |
| C  | -1.47211500 | -3.66086600 | -4.80349700 |
| C  | -0.19892200 | 0.18090200  | -1.40080800 |
| C  | 0.70357500  | 0.98776900  | -0.70180700 |
| H  | 1.27060500  | 1.74077900  | -1.25059500 |
| C  | 0.93827400  | 0.83602800  | 0.66015400  |
| C  | 3.61007500  | 0.93328200  | 1.85355900  |
| C  | -0.75691700 | -4.79217900 | -4.41156600 |
| C  | 1.19758900  | 1.01315900  | -3.77745400 |
| C  | 2.28393400  | 0.13027800  | -3.83441700 |
| H  | 2.13432100  | -0.92607400 | -3.59702800 |
| C  | -2.55479800 | -3.88313800 | -5.65389900 |
| C  | -1.67084400 | 1.64372400  | -3.49462700 |

|   |             |             |             |
|---|-------------|-------------|-------------|
| C | -1.08436000 | -6.08418600 | -4.82775300 |
| C | 3.54417600  | 0.59736300  | -4.18994000 |
| H | 4.38706600  | -0.09643200 | -4.23434400 |
| C | 1.38255200  | 2.36115800  | -4.09193700 |
| H | 0.54214900  | 3.05488200  | -4.05266900 |
| C | -1.73703100 | 2.78366900  | -2.68587900 |
| H | -1.01931400 | 2.92033100  | -1.87417000 |
| C | 2.53990200  | 3.22597300  | 0.35655500  |
| C | -2.61803500 | 1.45126100  | -4.50321100 |
| H | -2.58293000 | 0.54503200  | -5.11255400 |
| C | -2.17860400 | -6.26441300 | -5.68250500 |
| C | -2.92116200 | -5.15439100 | -6.10311400 |
| C | 3.81634000  | -0.31290100 | 1.25433200  |
| H | 3.08242900  | -0.69838800 | 0.54455200  |
| C | 2.64887000  | 2.82385400  | -4.44980800 |
| H | 2.78912300  | 3.88114200  | -4.68515300 |
| C | 3.68103700  | 3.13758100  | -0.44831300 |
| H | 4.34830000  | 2.27904900  | -0.35614900 |
| C | -3.67453600 | 3.53981100  | -3.91210200 |
| H | -4.46362500 | 4.27897800  | -4.07048000 |
| C | -2.73163800 | 3.73269700  | -2.90145700 |
| H | -2.77804100 | 4.62391000  | -2.27037500 |
| C | 3.72876900  | 1.94713400  | -4.49679000 |
| H | 4.71950600  | 2.31323800  | -4.77682200 |
| C | 1.68329300  | 4.32822300  | 0.23594200  |
| H | 0.80560800  | 4.40535800  | 0.88147200  |
| C | 3.08966100  | 5.22647700  | -1.50923400 |
| H | 3.30502600  | 6.00866600  | -2.24125300 |
| C | 1.95648500  | 5.32156300  | -0.70030100 |
| H | 1.28626900  | 6.17970700  | -0.79137300 |
| C | 3.95001100  | 4.13751300  | -1.38012300 |
| H | 4.83308800  | 4.05777700  | -2.01792900 |
| C | 4.94404500  | -1.06158700 | 1.58123600  |
| H | 5.09276300  | -2.04248300 | 1.12452800  |
| C | -3.61940100 | 2.39796400  | -4.70807000 |
| H | -4.36768500 | 2.23426600  | -5.48692400 |
| C | 4.53498600  | 1.42034300  | 2.78479500  |
| H | 4.35854900  | 2.37775500  | 3.27882400  |
| C | 5.86867100  | -0.56978900 | 2.50051800  |
| H | 6.74746600  | -1.16437400 | 2.76155200  |
| C | 5.66592200  | 0.67409000  | 3.09923100  |
| H | 6.38252100  | 1.05862700  | 3.82886700  |
| P | 0.40627600  | -0.33698100 | 3.18824300  |
| P | -2.08055700 | -1.91050300 | -1.54906400 |
| C | 0.19892200  | -0.18090200 | 1.40080800  |
| C | -0.70357500 | -0.98776900 | 0.70180700  |
| H | -1.27060500 | -1.74077900 | 1.25059500  |

|    |             |             |             |
|----|-------------|-------------|-------------|
| C  | -0.93827400 | -0.83602800 | -0.66015400 |
| C  | -3.61007500 | -0.93328200 | -1.85355900 |
| C  | -1.19758900 | -1.01315900 | 3.77745400  |
| C  | -2.28393400 | -0.13027800 | 3.83441700  |
| H  | -2.13432100 | 0.92607400  | 3.59702800  |
| C  | 1.67084400  | -1.64372400 | 3.49462700  |
| C  | -3.54417600 | -0.59736300 | 4.18994000  |
| H  | -4.38706600 | 0.09643200  | 4.23434400  |
| C  | -1.38255200 | -2.36115800 | 4.09193700  |
| H  | -0.54214900 | -3.05488200 | 4.05266900  |
| C  | 1.73703100  | -2.78366900 | 2.68587900  |
| H  | 1.01931400  | -2.92033100 | 1.87417000  |
| C  | -2.53990200 | -3.22597300 | -0.35655500 |
| C  | 2.61803500  | -1.45126100 | 4.50321100  |
| H  | 2.58293000  | -0.54503200 | 5.11255400  |
| C  | -3.81634000 | 0.31290100  | -1.25433200 |
| H  | -3.08242900 | 0.69838800  | -0.54455200 |
| C  | -2.64887000 | -2.82385400 | 4.44980800  |
| H  | -2.78912300 | -3.88114200 | 4.68515300  |
| C  | -3.68103700 | -3.13758100 | 0.44831300  |
| H  | -4.34830000 | -2.27904900 | 0.35614900  |
| C  | 3.67453600  | -3.53981100 | 3.91210200  |
| H  | 4.46362500  | -4.27897800 | 4.07048000  |
| C  | 2.73163800  | -3.73269700 | 2.90145700  |
| H  | 2.77804100  | -4.62391000 | 2.27037500  |
| C  | -3.72876900 | -1.94713400 | 4.49679000  |
| H  | -4.71950600 | -2.31323800 | 4.77682200  |
| C  | -1.68329300 | -4.32822300 | -0.23594200 |
| H  | -0.80560800 | -4.40535800 | -0.88147200 |
| C  | -3.08966100 | -5.22647700 | 1.50923400  |
| H  | -3.30502600 | -6.00866600 | 2.24125300  |
| C  | -1.95648500 | -5.32156300 | 0.70030100  |
| H  | -1.28626900 | -6.17970700 | 0.79137300  |
| C  | -3.95001100 | -4.13751300 | 1.38012300  |
| H  | -4.83308800 | -4.05777700 | 2.01792900  |
| C  | -4.94404500 | 1.06158700  | -1.58123600 |
| H  | -5.09276300 | 2.04248300  | -1.12452800 |
| C  | 3.61940100  | -2.39796400 | 4.70807000  |
| H  | 4.36768500  | -2.23426600 | 5.48692400  |
| C  | -4.53498600 | -1.42034300 | -2.78479500 |
| H  | -4.35854900 | -2.37775500 | -3.27882400 |
| C  | -5.86867100 | 0.56978900  | -2.50051800 |
| H  | -6.74746600 | 1.16437400  | -2.76155200 |
| C  | -5.66592200 | -0.67409000 | -3.09923100 |
| H  | -6.38252100 | -1.05862700 | -3.82886700 |
| Au | 1.03006500  | 1.78378400  | 4.01712900  |
| C  | 1.47211500  | 3.66086600  | 4.80349700  |

|   |             |             |             |
|---|-------------|-------------|-------------|
| C | 0.75691700  | 4.79217900  | 4.41156600  |
| C | 2.55479800  | 3.88313800  | 5.65389900  |
| C | 1.08436000  | 6.08418600  | 4.82775300  |
| C | 2.17860400  | 6.26441300  | 5.68250500  |
| C | 2.92116200  | 5.15439100  | 6.10311400  |
| F | -0.29755144 | 4.62675912  | 3.58498717  |
| F | 0.36930713  | 7.15268948  | 4.41604957  |
| F | 2.51733661  | 7.50364431  | 6.09731336  |
| F | 3.97632224  | 5.32540363  | 6.92766937  |
| F | 3.28583854  | 2.82007493  | 6.05136173  |
| F | 0.29755144  | -4.62675912 | -3.58498717 |
| F | -0.36930713 | -7.15268948 | -4.41604957 |
| F | -2.51733661 | -7.50364431 | -6.09731336 |
| F | -3.97632224 | -5.32540363 | -6.92766937 |
| F | -3.28583854 | -2.82007493 | -6.05136173 |

124

**Model\_2 T1**

|    |             |             |             |
|----|-------------|-------------|-------------|
| Au | -0.95320600 | -1.79853700 | -4.07285600 |
| P  | -0.33919800 | 0.30987800  | -3.20125300 |
| P  | 1.96208000  | 2.01001000  | 1.57621800  |
| C  | -1.55090500 | -3.62356200 | -4.85977200 |
| C  | -0.17950500 | 0.16480700  | -1.40866600 |
| C  | 0.66067000  | 1.02459400  | -0.68867900 |
| H  | 1.19925300  | 1.80542000  | -1.22678300 |
| C  | 0.87858300  | 0.88498500  | 0.67535100  |
| C  | 3.50018600  | 1.06790900  | 1.94802500  |
| C  | -1.08144300 | -4.82444200 | -4.34865800 |
| C  | 1.26411200  | 1.03152400  | -3.74539300 |
| C  | 2.41750100  | 0.25795700  | -3.55917600 |
| H  | 2.33282900  | -0.74433600 | -3.13196500 |
| C  | -2.55896200 | -3.73126500 | -5.80672000 |
| C  | -1.61574200 | 1.59356600  | -3.55790800 |
| C  | -1.55733000 | -6.07254400 | -4.74059200 |
| C  | 3.66344500  | 0.76588600  | -3.90817600 |
| H  | 4.55843100  | 0.15687900  | -3.76026300 |
| C  | 1.37125500  | 2.31167300  | -4.29219500 |
| H  | 0.47893400  | 2.92122900  | -4.43935900 |
| C  | -1.69892000 | 2.75630800  | -2.78343100 |
| H  | -0.98439800 | 2.92884600  | -1.97591400 |
| C  | 2.42594200  | 3.31632700  | 0.37522600  |
| C  | -2.55223400 | 1.36386800  | -4.56864600 |
| H  | -2.50274700 | 0.44242600  | -5.15420600 |
| C  | -2.56362800 | -6.12039600 | -5.70165300 |
| C  | -3.07873300 | -4.94720400 | -6.24619200 |
| C  | 3.76443300  | -0.17132600 | 1.35700400  |
| H  | 3.07510600  | -0.57168600 | 0.61155800  |



|   |             |             |             |
|---|-------------|-------------|-------------|
| C | 2.62376400  | 2.81609900  | -4.64270900 |
| H | 2.70126000  | 3.82147000  | -5.06312600 |
| C | 3.51609400  | 3.17849400  | -0.49151100 |
| H | 4.14435300  | 2.28753300  | -0.44124000 |
| C | -3.63653900 | 3.45543700  | -4.04349900 |
| H | -4.43184100 | 4.18172600  | -4.22843900 |
| C | -2.70340800 | 3.68648000  | -3.03124500 |
| H | -2.76370100 | 4.59452000  | -2.42601400 |
| C | 3.76848300  | 2.04810500  | -4.45104300 |
| H | 4.74806300  | 2.44657000  | -4.72610900 |
| C | 1.61961100  | 4.45986000  | 0.31105500  |
| H | 0.78561700  | 4.57512700  | 1.00723700  |
| C | 2.96977600  | 5.30246000  | -1.50479300 |
| H | 3.18235800  | 6.07884500  | -2.24373400 |
| C | 1.89084700  | 5.44773500  | -0.63246700 |
| H | 1.26186200  | 6.33985100  | -0.67947400 |
| C | 3.78169900  | 4.17133400  | -1.43123500 |
| H | 4.62198300  | 4.05383800  | -2.11853300 |
| C | 4.89110400  | -0.89592900 | 1.73770900  |
| H | 5.08422800  | -1.87180100 | 1.28691400  |
| C | -3.56157800 | 2.29402700  | -4.80842100 |
| H | -4.29963200 | 2.10106100  | -5.59014600 |
| C | 4.36604700  | 1.57109700  | 2.92739800  |
| H | 4.14355300  | 2.52397600  | 3.41310000  |
| C | 5.75635100  | -0.38782500 | 2.70437400  |
| H | 6.63307200  | -0.96443900 | 3.00874200  |
| C | 5.49596300  | 0.84857800  | 3.29632600  |
| H | 6.16633200  | 1.24494400  | 4.06249800  |
| P | 0.33919800  | -0.30987800 | 3.20125300  |
| P | -1.96208000 | -2.01001000 | -1.57621800 |
| C | 0.17950500  | -0.16480700 | 1.40866600  |
| C | -0.66067000 | -1.02459400 | 0.68867900  |
| H | -1.19925300 | -1.80542000 | 1.22678300  |
| C | -0.87858300 | -0.88498500 | -0.67535100 |
| C | -3.50018600 | -1.06790900 | -1.94802500 |
| C | -1.26411200 | -1.03152400 | 3.74539300  |
| C | -2.41750100 | -0.25795700 | 3.55917600  |
| H | -2.33282900 | 0.74433600  | 3.13196500  |
| C | 1.61574200  | -1.59356600 | 3.55790800  |
| C | -3.66344500 | -0.76588600 | 3.90817600  |
| H | -4.55843100 | -0.15687900 | 3.76026300  |
| C | -1.37125500 | -2.31167300 | 4.29219500  |
| H | -0.47893400 | -2.92122900 | 4.43935900  |
| C | 1.69892000  | -2.75630800 | 2.78343100  |
| H | 0.98439800  | -2.92884600 | 1.97591400  |
| C | -2.42594200 | -3.31632700 | -0.37522600 |
| C | 2.55223400  | -1.36386800 | 4.56864600  |

|    |             |             |             |
|----|-------------|-------------|-------------|
| H  | 2.50274700  | -0.44242600 | 5.15420600  |
| C  | -3.76443300 | 0.17132600  | -1.35700400 |
| H  | -3.07510600 | 0.57168600  | -0.61155800 |
| C  | -2.62376400 | -2.81609900 | 4.64270900  |
| H  | -2.70126000 | -3.82147000 | 5.06312600  |
| C  | -3.51609400 | -3.17849400 | 0.49151100  |
| H  | -4.14435300 | -2.28753300 | 0.44124000  |
| C  | 3.63653900  | -3.45543700 | 4.04349900  |
| H  | 4.43184100  | -4.18172600 | 4.22843900  |
| C  | 2.70340800  | -3.68648000 | 3.03124500  |
| H  | 2.76370100  | -4.59452000 | 2.42601400  |
| C  | -3.76848300 | -2.04810500 | 4.45104300  |
| H  | -4.74806300 | -2.44657000 | 4.72610900  |
| C  | -1.61961100 | -4.45986000 | -0.31105500 |
| H  | -0.78561700 | -4.57512700 | -1.00723700 |
| C  | -2.96977600 | -5.30246000 | 1.50479300  |
| H  | -3.18235800 | -6.07884500 | 2.24373400  |
| C  | -1.89084700 | -5.44773500 | 0.63246700  |
| H  | -1.26186200 | -6.33985100 | 0.67947400  |
| C  | -3.78169900 | -4.17133400 | 1.43123500  |
| H  | -4.62198300 | -4.05383800 | 2.11853300  |
| C  | -4.89110400 | 0.89592900  | -1.73770900 |
| H  | -5.08422800 | 1.87180100  | -1.28691400 |
| C  | 3.56157800  | -2.29402700 | 4.80842100  |
| H  | 4.29963200  | -2.10106100 | 5.59014600  |
| C  | -4.36604700 | -1.57109700 | -2.92739800 |
| H  | -4.14355300 | -2.52397600 | -3.41310000 |
| C  | -5.75635100 | 0.38782500  | -2.70437400 |
| H  | -6.63307200 | 0.96443900  | -3.00874200 |
| C  | -5.49596300 | -0.84857800 | -3.29632600 |
| H  | -6.16633200 | -1.24494400 | -4.06249800 |
| Au | 0.95320600  | 1.79853700  | 4.07285600  |
| C  | 1.55090500  | 3.62356200  | 4.85977200  |
| C  | 1.08144300  | 4.82444200  | 4.34865800  |
| C  | 2.55896200  | 3.73126500  | 5.80672000  |
| C  | 1.55733000  | 6.07254400  | 4.74059200  |
| C  | 2.56362800  | 6.12039600  | 5.70165300  |
| C  | 3.07873300  | 4.94720400  | 6.24619200  |
| F  | -3.08970200 | -2.60886100 | -6.32188300 |
| F  | -3.04090200 | -7.29576700 | -6.09715200 |
| F  | -0.12561200 | -4.79736800 | -3.40061700 |
| F  | 3.08970200  | 2.60886100  | 6.32188300  |
| F  | 0.12561200  | 4.79736800  | 3.40061700  |
| F  | 3.04090200  | 7.29576700  | 6.09715200  |
| Cl | 0.93288300  | 7.55007800  | 4.04498400  |
| Cl | 4.35350600  | 5.02005600  | 7.44023600  |
| Cl | -4.35350600 | -5.02005600 | -7.44023600 |

Cl -0.93288300 -7.55007800 -4.04498400

124

**Model\_3 T1**

|    |             |             |             |
|----|-------------|-------------|-------------|
| Au | -1.03006500 | -1.78378400 | -4.01712900 |
| P  | -0.40627600 | 0.33698100  | -3.18824300 |
| P  | 2.08055700  | 1.91050300  | 1.54906400  |
| C  | -1.47211500 | -3.66086600 | -4.80349700 |
| C  | -0.19892200 | 0.18090200  | -1.40080800 |
| C  | 0.70357500  | 0.98776900  | -0.70180700 |
| H  | 1.27060500  | 1.74077900  | -1.25059500 |
| C  | 0.93827400  | 0.83602800  | 0.66015400  |
| C  | 3.61007500  | 0.93328200  | 1.85355900  |
| C  | -0.75691700 | -4.79217900 | -4.41156600 |
| C  | 1.19758900  | 1.01315900  | -3.77745400 |
| C  | 2.28393400  | 0.13027800  | -3.83441700 |
| H  | 2.13432100  | -0.92607400 | -3.59702800 |
| C  | -2.55479800 | -3.88313800 | -5.65389900 |
| C  | -1.67084400 | 1.64372400  | -3.49462700 |
| C  | -1.08436000 | -6.08418600 | -4.82775300 |
| C  | 3.54417600  | 0.59736300  | -4.18994000 |
| H  | 4.38706600  | -0.09643200 | -4.23434400 |
| C  | 1.38255200  | 2.36115800  | -4.09193700 |
| H  | 0.54214900  | 3.05488200  | -4.05266900 |
| C  | -1.73703100 | 2.78366900  | -2.68587900 |
| H  | -1.01931400 | 2.92033100  | -1.87417000 |
| C  | 2.53990200  | 3.22597300  | 0.35655500  |
| C  | -2.61803500 | 1.45126100  | -4.50321100 |
| H  | -2.58293000 | 0.54503200  | -5.11255400 |
| C  | -2.17860400 | -6.26441300 | -5.68250500 |
| C  | -2.92116200 | -5.15439100 | -6.10311400 |
| C  | 3.81634000  | -0.31290100 | 1.25433200  |
| H  | 3.08242900  | -0.69838800 | 0.54455200  |
| C  | 2.64887000  | 2.82385400  | -4.44980800 |
| H  | 2.78912300  | 3.88114200  | -4.68515300 |
| C  | 3.68103700  | 3.13758100  | -0.44831300 |
| H  | 4.34830000  | 2.27904900  | -0.35614900 |
| C  | -3.67453600 | 3.53981100  | -3.91210200 |
| H  | -4.46362500 | 4.27897800  | -4.07048000 |
| C  | -2.73163800 | 3.73269700  | -2.90145700 |
| H  | -2.77804100 | 4.62391000  | -2.27037500 |
| C  | 3.72876900  | 1.94713400  | -4.49679000 |
| H  | 4.71950600  | 2.31323800  | -4.77682200 |
| C  | 1.68329300  | 4.32822300  | 0.23594200  |
| H  | 0.80560800  | 4.40535800  | 0.88147200  |
| C  | 3.08966100  | 5.22647700  | -1.50923400 |
| H  | 3.30502600  | 6.00866600  | -2.24125300 |

|   |             |             |             |
|---|-------------|-------------|-------------|
| C | 1.95648500  | 5.32156300  | -0.70030100 |
| H | 1.28626900  | 6.17970700  | -0.79137300 |
| C | 3.95001100  | 4.13751300  | -1.38012300 |
| H | 4.83308800  | 4.05777700  | -2.01792900 |
| C | 4.94404500  | -1.06158700 | 1.58123600  |
| H | 5.09276300  | -2.04248300 | 1.12452800  |
| C | -3.61940100 | 2.39796400  | -4.70807000 |
| H | -4.36768500 | 2.23426600  | -5.48692400 |
| C | 4.53498600  | 1.42034300  | 2.78479500  |
| H | 4.35854900  | 2.37775500  | 3.27882400  |
| C | 5.86867100  | -0.56978900 | 2.50051800  |
| H | 6.74746600  | -1.16437400 | 2.76155200  |
| C | 5.66592200  | 0.67409000  | 3.09923100  |
| H | 6.38252100  | 1.05862700  | 3.82886700  |
| P | 0.40627600  | -0.33698100 | 3.18824300  |
| P | -2.08055700 | -1.91050300 | -1.54906400 |
| C | 0.19892200  | -0.18090200 | 1.40080800  |
| C | -0.70357500 | -0.98776900 | 0.70180700  |
| H | -1.27060500 | -1.74077900 | 1.25059500  |
| C | -0.93827400 | -0.83602800 | -0.66015400 |
| C | -3.61007500 | -0.93328200 | -1.85355900 |
| C | -1.19758900 | -1.01315900 | 3.77745400  |
| C | -2.28393400 | -0.13027800 | 3.83441700  |
| H | -2.13432100 | 0.92607400  | 3.59702800  |
| C | 1.67084400  | -1.64372400 | 3.49462700  |
| C | -3.54417600 | -0.59736300 | 4.18994000  |
| H | -4.38706600 | 0.09643200  | 4.23434400  |
| C | -1.38255200 | -2.36115800 | 4.09193700  |
| H | -0.54214900 | -3.05488200 | 4.05266900  |
| C | 1.73703100  | -2.78366900 | 2.68587900  |
| H | 1.01931400  | -2.92033100 | 1.87417000  |
| C | -2.53990200 | -3.22597300 | -0.35655500 |
| C | 2.61803500  | -1.45126100 | 4.50321100  |
| H | 2.58293000  | -0.54503200 | 5.11255400  |
| C | -3.81634000 | 0.31290100  | -1.25433200 |
| H | -3.08242900 | 0.69838800  | -0.54455200 |
| C | -2.64887000 | -2.82385400 | 4.44980800  |
| H | -2.78912300 | -3.88114200 | 4.68515300  |
| C | -3.68103700 | -3.13758100 | 0.44831300  |
| H | -4.34830000 | -2.27904900 | 0.35614900  |
| C | 3.67453600  | -3.53981100 | 3.91210200  |
| H | 4.46362500  | -4.27897800 | 4.07048000  |
| C | 2.73163800  | -3.73269700 | 2.90145700  |
| H | 2.77804100  | -4.62391000 | 2.27037500  |
| C | -3.72876900 | -1.94713400 | 4.49679000  |
| H | -4.71950600 | -2.31323800 | 4.77682200  |
| C | -1.68329300 | -4.32822300 | -0.23594200 |

|    |             |             |             |
|----|-------------|-------------|-------------|
| H  | -0.80560800 | -4.40535800 | -0.88147200 |
| C  | -3.08966100 | -5.22647700 | 1.50923400  |
| H  | -3.30502600 | -6.00866600 | 2.24125300  |
| C  | -1.95648500 | -5.32156300 | 0.70030100  |
| H  | -1.28626900 | -6.17970700 | 0.79137300  |
| C  | -3.95001100 | -4.13751300 | 1.38012300  |
| H  | -4.83308800 | -4.05777700 | 2.01792900  |
| C  | -4.94404500 | 1.06158700  | -1.58123600 |
| H  | -5.09276300 | 2.04248300  | -1.12452800 |
| C  | 3.61940100  | -2.39796400 | 4.70807000  |
| H  | 4.36768500  | -2.23426600 | 5.48692400  |
| C  | -4.53498600 | -1.42034300 | -2.78479500 |
| H  | -4.35854900 | -2.37775500 | -3.27882400 |
| C  | -5.86867100 | 0.56978900  | -2.50051800 |
| H  | -6.74746600 | 1.16437400  | -2.76155200 |
| C  | -5.66592200 | -0.67409000 | -3.09923100 |
| H  | -6.38252100 | -1.05862700 | -3.82886700 |
| Au | 1.03006500  | 1.78378400  | 4.01712900  |
| C  | 1.47211500  | 3.66086600  | 4.80349700  |
| C  | 0.75691700  | 4.79217900  | 4.41156600  |
| C  | 2.55479800  | 3.88313800  | 5.65389900  |
| C  | 1.08436000  | 6.08418600  | 4.82775300  |
| C  | 2.17860400  | 6.26441300  | 5.68250500  |
| C  | 2.92116200  | 5.15439100  | 6.10311400  |
| Cl | 0.15875200  | 7.46732200  | 4.29481900  |
| Cl | 4.28671000  | 5.37570900  | 7.17022200  |
| Cl | -4.28671000 | -5.37570900 | -7.17022200 |
| Cl | -0.15875200 | -7.46732200 | -4.29481900 |
| Cl | -0.62664200 | 4.57513300  | 3.32701900  |
| Cl | 3.51273300  | 2.49013000  | 6.17472300  |
| Cl | 2.61635400  | 7.86589300  | 6.21856900  |
| Cl | 0.62664200  | -4.57513300 | -3.32701900 |
| Cl | -3.51273300 | -2.49013000 | -6.17472300 |
| Cl | -2.61635400 | -7.86589300 | -6.21856900 |

13. Representation of DFT optimized complexes **1-3** in the  $S_0$  state (PBE0 functional)

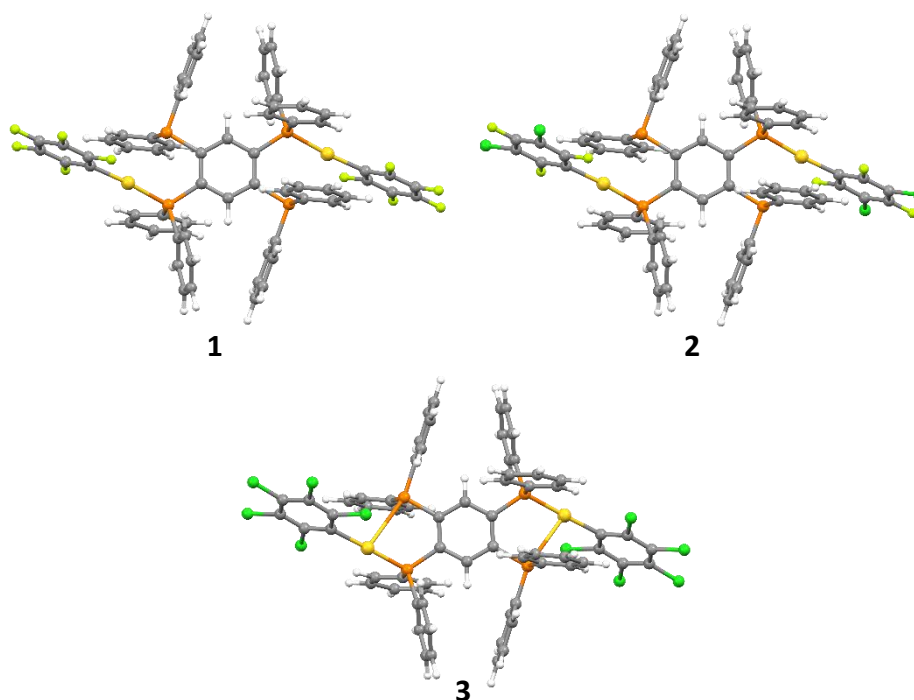

**Figure S46.** Model Systems of complexes **1-3** in the ground state  $S_0$ .

14. xyz coordinates for models **1a-3a** in the  $S_0$  state (PBE0 functional)

124

**Model\_1**  $S_0$

```
Au -4.672695 0.773207 0.371925
P -2.685180 1.781379 -0.221231
P 2.841102 1.548530 0.448300
F -5.905387 -0.430307 3.102081
F -8.311989 -1.487289 3.690179
F -10.248791 -1.632618 1.783866
F -9.756136 -0.712527 -0.731486
F -7.359139 0.349486 -1.342544
C -6.540296 0.006719 0.859682
C -6.836298 -0.477168 2.122575
C -8.065538 -1.027732 2.454983
C -9.056213 -1.105254 1.486376
C -8.801110 -0.633690 0.206864
C -7.556325 -0.090582 -0.075004
C -1.188731 0.736387 -0.064440
C 0.033834 1.359523 0.176089
H 0.047920 2.427972 0.328276
C 1.238949 0.659916 0.241123
C -2.649914 2.345336 -1.949876
```

C -3.850258 2.421908 -2.656480  
H -4.773754 2.124711 -2.177335  
C -3.855947 2.853157 -3.976841  
H -4.790587 2.897073 -4.520087  
C -2.666594 3.208621 -4.599442  
H -2.671718 3.538522 -5.630483  
C -1.465851 3.131908 -3.899920  
H -0.536187 3.403380 -4.383538  
C -1.455381 2.701725 -2.581274  
H -0.516502 2.640942 -2.048319  
C -2.311935 3.241101 0.797789  
C -2.208482 3.058689 2.180634  
H -2.314596 2.066930 2.603142  
C -1.984690 4.143413 3.013220  
H -1.903910 3.992957 4.081969  
C -1.882132 5.424019 2.476819  
H -1.717681 6.272314 3.128685  
C -1.991691 5.610406 1.106412  
H -1.907814 6.603254 0.684376  
C -2.201974 4.523227 0.265235  
H -2.281775 4.676547 -0.801665  
C 2.283063 3.294763 0.491210  
C 2.166058 3.944911 -0.741931  
H 2.415953 3.410539 -1.651461  
C 1.741432 5.264866 -0.809418  
H 1.649708 5.753732 -1.771034  
C 1.453126 5.961098 0.359231  
H 1.129563 6.992792 0.310319  
C 1.585451 5.329999 1.589779  
H 1.359173 5.867476 2.501381  
C 1.993385 4.003462 1.657788  
H 2.083379 3.517960 2.619817  
C 3.236975 1.182457 2.197303  
C 2.281626 0.816297 3.147868  
H 1.239368 0.747140 2.866157  
C 2.662033 0.521780 4.449981  
H 1.914619 0.223757 5.173840  
C 4.001296 0.591313 4.817522  
H 4.297630 0.350442 5.830475  
C 4.960626 0.951929 3.878445  
H 6.006932 0.991169 4.152118  
C 4.581112 1.240448 2.574226  
H 5.333756 1.492097 1.838861  
P 2.685180 -1.781379 0.221231  
P -2.841102 -1.548530 -0.448300  
C 1.188731 -0.736387 0.064440  
C -0.033834 -1.359523 -0.176089

H -0.047920 -2.427972 -0.328276  
C -1.238949 -0.659916 -0.241123  
C 2.649914 -2.345336 1.949876  
C 3.850258 -2.421908 2.656480  
H 4.773754 -2.124711 2.177335  
C 3.855947 -2.853157 3.976841  
H 4.790587 -2.897073 4.520087  
C 2.666594 -3.208621 4.599442  
H 2.671718 -3.538522 5.630483  
C 1.465851 -3.131908 3.899920  
H 0.536187 -3.403380 4.383538  
C 1.455381 -2.701725 2.581274  
H 0.516502 -2.640942 2.048319  
C 2.311935 -3.241101 -0.797789  
C 2.208482 -3.058689 -2.180634  
H 2.314596 -2.066930 -2.603142  
C 1.984690 -4.143413 -3.013220  
H 1.903910 -3.992957 -4.081969  
C 1.882132 -5.424019 -2.476819  
H 1.717681 -6.272314 -3.128685  
C 1.991691 -5.610406 -1.106412  
H 1.907814 -6.603254 -0.684376  
C 2.201974 -4.523227 -0.265235  
H 2.281775 -4.676547 0.801665  
C -2.283063 -3.294763 -0.491210  
C -2.166058 -3.944911 0.741931  
H -2.415953 -3.410539 1.651461  
C -1.741432 -5.264866 0.809418  
H -1.649708 -5.753732 1.771034  
C -1.453126 -5.961098 -0.359231  
H -1.129563 -6.992792 -0.310319  
C -1.585451 -5.329999 -1.589779  
H -1.359173 -5.867476 -2.501381  
C -1.993385 -4.003462 -1.657788  
H -2.083379 -3.517960 -2.619817  
C -3.236975 -1.182457 -2.197303  
C -2.281626 -0.816297 -3.147868  
H -1.239368 -0.747140 -2.866157  
C -2.662033 -0.521780 -4.449981  
H -1.914619 -0.223757 -5.173840  
C -4.001296 -0.591313 -4.817522  
H -4.297630 -0.350442 -5.830475  
C -4.960626 -0.951929 -3.878445  
H -6.006932 -0.991169 -4.152118  
C -4.581112 -1.240448 -2.574226  
H -5.333756 -1.492097 -1.838861  
Au 4.672695 -0.773207 -0.371925



F 5.905387 0.430307 -3.102081  
F 8.311989 1.487289 -3.690179  
F 10.248791 1.632618 -1.783866  
F 9.756136 0.712527 0.731486  
F 7.359139 -0.349486 1.342544  
C 6.540296 -0.006719 -0.859682  
C 6.836298 0.477168 -2.122575  
C 8.065538 1.027732 -2.454983  
C 9.056213 1.105254 -1.486376  
C 8.801110 0.633690 -0.206864  
C 7.556325 0.090582 0.075004

124

**Model\_2 S0**

Au -0.915256 -1.871830 -4.268667  
P -0.357407 0.098176 -3.208692  
P 1.931672 2.231769 1.399730  
C -1.446473 -3.558548 -5.358682  
C -0.150216 -0.011706 -1.391755  
C 0.705316 0.892240 -0.765857  
H 1.267165 1.580608 -1.378573  
C 0.876155 0.937832 0.617907  
C 3.415139 1.264188 1.861171  
C -0.689436 -4.717317 -5.357561  
C 1.220955 0.788843 -3.791719  
C 2.365360 -0.004385 -3.660052  
H 2.295666 -0.977576 -3.189500  
C -2.616481 -3.613251 -6.094995  
C -1.599714 1.407771 -3.431460  
C -1.048202 -5.877073 -6.038800  
C 3.584973 0.444163 -4.140959  
H 4.465869 -0.175402 -4.033429  
C 1.313934 2.027324 -4.421850  
H 0.436042 2.648348 -4.530474  
C -1.604854 2.557261 -2.636944  
H -0.863891 2.687976 -1.860351  
C 2.481396 3.185128 -0.067041  
C -2.569486 1.252815 -4.422246  
H -2.582352 0.353125 -5.023199  
C -2.236468 -5.869688 -6.760116  
C -3.040637 -4.736901 -6.798157  
C 3.769311 0.054035 1.260910  
H 3.157486 -0.353904 0.467379  
C 2.537437 2.466746 -4.915501  
H 2.600738 3.430063 -5.404291  
C 3.666854 2.948960 -0.764217  
H 4.326132 2.150852 -0.451610

C -3.529546 3.378808 -3.827621  
H -4.282632 4.142016 -3.976937  
C -2.565708 3.537600 -2.836249  
H -2.565041 4.424193 -2.215098  
C 3.671624 1.680007 -4.776098  
H 4.622709 2.025631 -5.160240  
C 1.647210 4.227619 -0.484490  
H 0.738485 4.436409 0.068571  
C 3.158724 4.752600 -2.280473  
H 3.422025 5.357077 -3.138825  
C 1.976124 4.998114 -1.591456  
H 1.318217 5.797917 -1.907015  
C 4.003337 3.732208 -1.861466  
H 4.922822 3.535701 -2.397214  
C 4.892724 -0.640576 1.688163  
H 5.148105 -1.585493 1.226282  
C -3.529740 2.237108 -4.618253  
H -4.284796 2.101849 -5.381273  
C 4.203784 1.761278 2.901946  
H 3.922323 2.682596 3.394422  
C 5.675825 -0.133164 2.719093  
H 6.545216 -0.681675 3.058525  
C 5.330767 1.069307 3.325232  
H 5.924724 1.462109 4.140162  
P 0.357407 -0.098176 3.208692  
P -1.931672 -2.231769 -1.399730  
C 0.150216 0.011706 1.391755  
C -0.705316 -0.892240 0.765857  
H -1.267165 -1.580608 1.378573  
C -0.876155 -0.937832 -0.617907  
C -3.415139 -1.264188 -1.861171  
C -1.220955 -0.788843 3.791719  
C -2.365360 0.004385 3.660052  
H -2.295666 0.977576 3.189500  
C 1.599714 -1.407771 3.431460  
C -3.584973 -0.444163 4.140959  
H -4.465869 0.175402 4.033429  
C -1.313934 -2.027324 4.421850  
H -0.436042 -2.648348 4.530474  
C 1.604854 -2.557261 2.636944  
H 0.863891 -2.687976 1.860351  
C -2.481396 -3.185128 0.067041  
C 2.569486 -1.252815 4.422246  
H 2.582352 -0.353125 5.023199  
C -3.769311 -0.054035 -1.260910  
H -3.157486 0.353904 -0.467379  
C -2.537437 -2.466746 4.915501

H -2.600738 -3.430063 5.404291  
C -3.666854 -2.948960 0.764217  
H -4.326132 -2.150852 0.451610  
C 3.529546 -3.378808 3.827621  
H 4.282632 -4.142016 3.976937  
C 2.565708 -3.537600 2.836249  
H 2.565041 -4.424193 2.215098  
C -3.671624 -1.680007 4.776098  
H -4.622709 -2.025631 5.160240  
C -1.647210 -4.227619 0.484490  
H -0.738485 -4.436409 -0.068571  
C -3.158724 -4.752600 2.280473  
H -3.422025 -5.357077 3.138825  
C -1.976124 -4.998114 1.591456  
H -1.318217 -5.797917 1.907015  
C -4.003337 -3.732208 1.861466  
H -4.922822 -3.535701 2.397214  
C -4.892724 0.640576 -1.688163  
H -5.148105 1.585493 -1.226282  
C 3.529740 -2.237108 4.618253  
H 4.284796 -2.101849 5.381273  
C -4.203784 -1.761278 -2.901946  
H -3.922323 -2.682596 -3.394422  
C -5.675825 0.133164 -2.719093  
H -6.545216 0.681675 -3.058525  
C -5.330767 -1.069307 -3.325232  
H -5.924724 -1.462109 -4.140162  
Au 0.915256 1.871830 4.268667  
C 1.446473 3.558548 5.358682  
C 0.689436 4.717317 5.357561  
C 2.616481 3.613251 6.094995  
C 1.048202 5.877073 6.038800  
C 2.236468 5.869688 6.760116  
C 3.040637 4.736901 6.798157  
F -3.415975 -2.523064 -6.138940  
F -2.611602 -6.965966 -7.423032  
F 0.462744 -4.745286 -4.657317  
F 3.415975 2.523064 6.138940  
F -0.462744 4.745286 4.657317  
F 2.611602 6.965966 7.423032  
Cl 0.061593 7.297024 5.998693  
Cl 4.520653 4.744593 7.693841  
Cl -4.520653 -4.744593 -7.693841  
Cl -0.061593 -7.297024 -5.998693

124

**Model\_3 S0**

Au 4.555873 -1.010374 -0.449006  
Cl 7.324321 -1.850351 1.262891  
Cl 10.083203 -0.397129 1.079829  
Cl 10.461204 2.001484 -0.888292  
Cl 8.075138 2.950605 -2.671204  
Cl 5.314648 1.494546 -2.491710  
P 2.505217 -2.027806 -0.222018  
P -2.931971 -1.063446 -0.965530  
C 6.438445 -0.131958 -0.639051  
C 7.523802 -0.518470 0.143313  
C 8.765415 0.119280 0.084929  
C 8.936785 1.194251 -0.792939  
C 7.868229 1.615165 -1.591157  
C 6.646075 0.945891 -1.497333  
C 1.112732 -0.842414 -0.109490  
C -0.142382 -1.243963 -0.560621  
H -0.241767 -2.218805 -1.013200  
C -1.274551 -0.434570 -0.463973  
C 2.343605 -3.044247 1.276298  
C 3.501313 -3.430624 1.951812  
H 4.466567 -3.103906 1.588409  
C 3.411575 -4.208211 3.099166  
H 4.314113 -4.492750 3.623754  
C 2.169372 -4.603016 3.578800  
H 2.100807 -5.203490 4.476947  
C 1.011279 -4.218088 2.910000  
H 0.041199 -4.519873 3.283798  
C 1.095790 -3.440759 1.764152  
H 0.189853 -3.139926 1.255839  
C 2.064781 -3.101597 -1.621627  
C 2.107337 -2.541566 -2.902640  
H 2.371803 -1.498340 -3.025569  
C 1.828664 -3.320333 -4.014399  
H 1.862801 -2.878954 -5.002060  
C 1.525220 -4.670418 -3.861104  
H 1.317901 -5.280637 -4.730677  
C 1.490191 -5.231728 -2.592874  
H 1.249864 -6.279343 -2.468459  
C 1.754300 -4.451123 -1.472848  
H 1.720408 -4.895293 -0.488143  
C -2.543168 -2.781821 -1.469011  
C -2.605379 -3.753407 -0.464497  
H -2.885849 -3.461451 0.541130  
C -2.328338 -5.083723 -0.749623  
H -2.376792 -5.825517 0.037481

C -2.011650 -5.463191 -2.049376  
H -1.805656 -6.501349 -2.276317  
C -1.966412 -4.507575 -3.057306  
H -1.717097 -4.798762 -4.069296  
C -2.225982 -3.173240 -2.770454  
H -2.180725 -2.434995 -3.559470  
C -3.196001 -0.196766 -2.555149  
C -2.164997 0.335868 -3.331597  
H -1.137784 0.232465 -3.008082  
C -2.449974 1.016152 -4.507855  
H -1.643619 1.439334 -5.092766  
C -3.768147 1.168985 -4.923013  
H -3.989152 1.708756 -5.835062  
C -4.802190 0.644463 -4.156025  
H -5.831854 0.774971 -4.462790  
C -4.517861 -0.028997 -2.975773  
H -5.326221 -0.409283 -2.364983  
P -2.505217 2.027806 0.222018  
P 2.931971 1.063446 0.965530  
C -1.112732 0.842414 0.109490  
C 0.142382 1.243963 0.560621  
H 0.241767 2.218805 1.013200  
C 1.274551 0.434570 0.463973  
C -2.343605 3.044247 -1.276298  
C -3.501313 3.430624 -1.951812  
H -4.466567 3.103906 -1.588409  
C -3.411575 4.208211 -3.099166  
H -4.314113 4.492750 -3.623754  
C -2.169372 4.603016 -3.578800  
H -2.100807 5.203490 -4.476947  
C -1.011279 4.218088 -2.910000  
H -0.041199 4.519873 -3.283798  
C -1.095790 3.440759 -1.764152  
H -0.189853 3.139926 -1.255839  
C -2.064781 3.101597 1.621627  
C -2.107337 2.541566 2.902640  
H -2.371803 1.498340 3.025569  
C -1.828664 3.320333 4.014399  
H -1.862801 2.878954 5.002060  
C -1.525220 4.670418 3.861104  
H -1.317901 5.280637 4.730677  
C -1.490191 5.231728 2.592874  
H -1.249864 6.279343 2.468459  
C -1.754300 4.451123 1.472848  
H -1.720408 4.895293 0.488143  
C 2.543168 2.781821 1.469011  
C 2.605379 3.753407 0.464497

H 2.885849 3.461451 -0.541130  
C 2.328338 5.083723 0.749623  
H 2.376792 5.825517 -0.037481  
C 2.011650 5.463191 2.049376  
H 1.805656 6.501349 2.276317  
C 1.966412 4.507575 3.057306  
H 1.717097 4.798762 4.069296  
C 2.225982 3.173240 2.770454  
H 2.180725 2.434995 3.559470  
C 3.196001 0.196766 2.555149  
C 2.164997 -0.335868 3.331597  
H 1.137784 -0.232465 3.008082  
C 2.449974 -1.016152 4.507855  
H 1.643619 -1.439334 5.092766  
C 3.768147 -1.168985 4.923013  
H 3.989152 -1.708756 5.835062  
C 4.802190 -0.644463 4.156025  
H 5.831854 -0.774971 4.462790  
C 4.517861 0.028997 2.975773  
H 5.326221 0.409283 2.364983  
Au -4.555873 1.010374 0.449006  
Cl -7.324321 1.850351 -1.262891  
Cl -10.083203 0.397129 -1.079829  
Cl -10.461204 -2.001484 0.888292  
Cl -8.075138 -2.950605 2.671204  
Cl -5.314648 -1.494546 2.491710  
C -6.438445 0.131958 0.639051  
C -7.523802 0.518470 -0.143313  
C -8.765415 -0.119280 -0.084929  
C -8.936785 -1.194251 0.792939  
C -7.868229 -1.615165 1.591157  
C -6.646075 -0.945891 1.497333

15. Representation of DFT optimized complexes **1-3** in the  $S_1$  state (PBE0 functional)

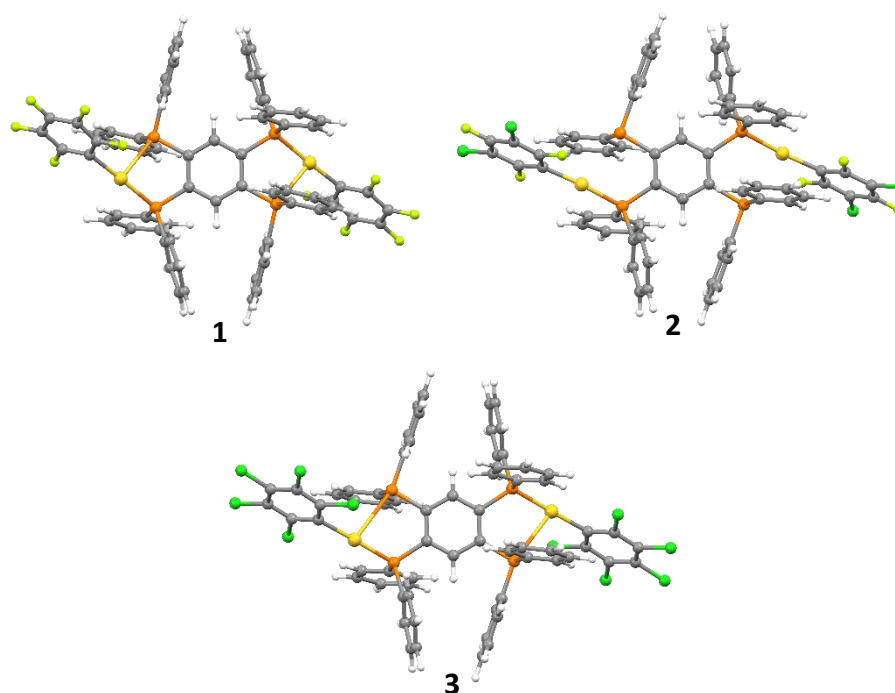

**Figure S47.** Model Systems of complexes **1-3** in the ground state  $S_0$ .

16. xyz coordinates for models **1a-3a** in the  $S_1$  state (PBE0 functional)

124

**Model\_1 S1**

```

Au -1.048646 -1.906952 -3.906608
P -0.308379 0.182619 -3.173314
P 1.976342 1.954016 1.566743
C -1.534387 -3.655485 -4.898831
C -0.128105 0.090113 -1.413615
C 0.709955 0.980362 -0.697259
H 1.288104 1.717867 -1.239886
C 0.843529 0.889068 0.666089
C 3.505712 1.003169 1.717522
C -0.889761 -4.849991 -4.638261
C 1.302629 0.758920 -3.766997
C 2.450546 0.117437 -3.299920
H 2.356491 -0.705807 -2.600184
C -2.577476 -3.718920 -5.804203
C -1.470119 1.524165 -3.555890
C -1.233807 -6.045638 -5.243801
C 3.702024 0.538304 -3.713351
H 4.588015 0.037139 -3.341067
C 1.426858 1.818843 -4.660058
  
```

H 0.540861 2.325173 -5.023837  
C -1.374164 2.761498 -2.916831  
H -0.555224 2.961698 -2.234878  
C 2.324212 3.328632 0.452768  
C -2.536561 1.277697 -4.415950  
H -2.622576 0.310046 -4.899866  
C -2.278777 -6.062171 -6.153377  
C -2.959593 -4.889256 -6.437055  
C 3.653968 -0.252929 1.134795  
H 2.857696 -0.658792 0.522588  
C 2.683224 2.235570 -5.074142  
H 2.771298 3.063998 -5.767369  
C 3.320539 3.252432 -0.519739  
H 3.949476 2.371877 -0.581635  
C -3.395533 3.481750 -4.000509  
H -4.148334 4.243275 -4.168212  
C -2.332295 3.734055 -3.140871  
H -2.252386 4.692456 -2.640730  
C 3.821114 1.600041 -4.600968  
H 4.801744 1.929863 -4.923957  
C 1.518394 4.463465 0.535346  
H 0.761136 4.531275 1.309408  
C 2.673212 5.414436 -1.345406  
H 2.807120 6.227244 -2.049674  
C 1.692671 5.501213 -0.365573  
H 1.066545 6.383083 -0.297959  
C 3.487526 4.293377 -1.419561  
H 4.250138 4.222882 -2.186103  
C 4.809756 -0.986013 1.353560  
H 4.912589 -1.969516 0.910456  
C -3.495267 2.254988 -4.637426  
H -4.326176 2.050139 -5.301995  
C 4.521949 1.513804 2.525947  
H 4.396743 2.478398 3.006615  
C 5.823139 -0.468978 2.146415  
H 6.723606 -1.046649 2.319798  
C 5.679997 0.783516 2.729260  
H 6.465970 1.185953 3.357311  
P 0.308379 -0.182619 3.173314  
P -1.976342 -1.954016 -1.566743  
C 0.128105 -0.090113 1.413615  
C -0.709955 -0.980362 0.697259  
H -1.288104 -1.717867 1.239886  
C -0.843529 -0.889068 -0.666089  
C -3.505712 -1.003169 -1.717522  
C -1.302629 -0.758920 3.766997  
C -2.450546 -0.117437 3.299920



H -2.356491 0.705807 2.600184  
C 1.470119 -1.524165 3.555890  
C -3.702024 -0.538304 3.713351  
H -4.588015 -0.037139 3.341067  
C -1.426858 -1.818843 4.660058  
H -0.540861 -2.325173 5.023837  
C 1.374164 -2.761498 2.916831  
H 0.555224 -2.961698 2.234878  
C -2.324212 -3.328632 -0.452768  
C 2.536561 -1.277697 4.415950  
H 2.622576 -0.310046 4.899866  
C -3.653968 0.252929 -1.134795  
H -2.857696 0.658792 -0.522588  
C -2.683224 -2.235570 5.074142  
H -2.771298 -3.063998 5.767369  
C -3.320539 -3.252432 0.519739  
H -3.949476 -2.371877 0.581635  
C 3.395533 -3.481750 4.000509  
H 4.148334 -4.243275 4.168212  
C 2.332295 -3.734055 3.140871  
H 2.252386 -4.692456 2.640730  
C -3.821114 -1.600041 4.600968  
H -4.801744 -1.929863 4.923957  
C -1.518394 -4.463465 -0.535346  
H -0.761136 -4.531275 -1.309408  
C -2.673212 -5.414436 1.345406  
H -2.807120 -6.227244 2.049674  
C -1.692671 -5.501213 0.365573  
H -1.066545 -6.383083 0.297959  
C -3.487526 -4.293377 1.419561  
H -4.250138 -4.222882 2.186103  
C -4.809756 0.986013 -1.353560  
H -4.912589 1.969516 -0.910456  
C 3.495267 -2.254988 4.637426  
H 4.326176 -2.050139 5.301995  
C -4.521949 -1.513804 -2.525947  
H -4.396743 -2.478398 -3.006615  
C -5.823139 0.468978 -2.146415  
H -6.723606 1.046649 -2.319798  
C -5.679997 -0.783516 -2.729260  
H -6.465970 -1.185953 -3.357311  
Au 1.048646 1.906952 3.906608  
C 1.534387 3.655485 4.898831  
C 0.889761 4.849991 4.638261  
C 2.577476 3.718920 5.804203  
C 1.233807 6.045638 5.243801  
C 2.278777 6.062171 6.153377

C 2.959593 4.889256 6.437055  
F -0.120833 4.888108 3.752370  
F 0.585290 7.173937 4.967074  
F 2.628910 7.196540 6.746122  
F 3.965843 4.908993 7.307006  
F 3.277023 2.612373 6.102433  
F 0.120833 -4.888108 -3.752370  
F -0.585290 -7.173937 -4.967074  
F -2.628910 -7.196540 -6.746122  
F -3.965843 -4.908993 -7.307006  
F -3.277023 -2.612373 -6.102433

124

**Model\_2 S1**

Au -1.015250 -1.907185 -3.915129  
P -0.283451 0.181980 -3.176175  
P 1.962203 1.957685 1.579839  
C -1.510873 -3.664357 -4.888095  
C -0.119066 0.090638 -1.414623  
C 0.713438 0.981130 -0.692358  
H 1.294503 1.719424 -1.230896  
C 0.838575 0.889751 0.671837  
C 3.490512 1.008732 1.750725  
C -0.882455 -4.862707 -4.608413  
C 1.331707 0.761690 -3.755205  
C 2.476136 0.117734 -3.282968  
H 2.376894 -0.709640 -2.588811  
C -2.556766 -3.738777 -5.788904  
C -1.445027 1.520394 -3.570517  
C -1.236957 -6.076402 -5.181692  
C 3.730654 0.541415 -3.684061  
H 4.613917 0.038266 -3.307983  
C 1.462544 1.827123 -4.640638  
H 0.579322 2.335532 -5.008204  
C -1.363660 2.755517 -2.925333  
H -0.556522 2.955662 -2.229440  
C 2.323503 3.331460 0.469124  
C -2.496921 1.273447 -4.448151  
H -2.572131 0.307144 -4.936527  
C -2.288592 -6.085120 -6.086994  
C -2.965451 -4.915653 -6.403115  
C 3.646055 -0.249899 1.175492  
H 2.857146 -0.658970 0.555913  
C 2.722023 2.246785 -5.042256  
H 2.815219 3.079688 -5.729412  
C 3.328688 3.252750 -0.494154  
H 3.952929 2.368669 -0.553394

C -3.369987 3.472987 -4.038414  
H -4.122738 4.232521 -4.215137  
C -2.321464 3.725673 -3.161021  
H -2.253016 4.682405 -2.656027  
C 3.856338 1.608627 -4.564223  
H 4.839365 1.940686 -4.877481  
C 1.524430 4.471271 0.548567  
H 0.760020 4.541007 1.315215  
C 2.704688 5.423244 -1.315646  
H 2.851906 6.238791 -2.014089  
C 1.715077 5.512268 -0.345265  
H 1.095146 6.398554 -0.278546  
C 3.511446 4.296519 -1.387525  
H 4.281076 4.224295 -2.146861  
C 4.799589 -0.981368 1.411050  
H 4.907953 -1.966883 0.973789  
C -3.455409 2.248248 -4.681247  
H -4.275103 2.042953 -5.359472  
C 4.497331 1.523825 2.568147  
H 4.366540 2.490802 3.042492  
C 5.803419 -0.460183 2.213262  
H 6.701980 -1.036696 2.399887  
C 5.653183 0.795088 2.788351  
H 6.431612 1.201012 3.423506  
P 0.283451 -0.181980 3.176175  
P -1.962203 -1.957685 -1.579839  
C 0.119066 -0.090638 1.414623  
C -0.713438 -0.981130 0.692358  
H -1.294503 -1.719424 1.230896  
C -0.838575 -0.889751 -0.671837  
C -3.490512 -1.008732 -1.750725  
C -1.331707 -0.761690 3.755205  
C -2.476136 -0.117734 3.282968  
H -2.376894 0.709640 2.588811  
C 1.445027 -1.520394 3.570517  
C -3.730654 -0.541415 3.684061  
H -4.613917 -0.038266 3.307983  
C -1.462544 -1.827123 4.640638  
H -0.579322 -2.335532 5.008204  
C 1.363660 -2.755517 2.925333  
H 0.556522 -2.955662 2.229440  
C -2.323503 -3.331460 -0.469124  
C 2.496921 -1.273447 4.448151  
H 2.572131 -0.307144 4.936527  
C -3.646055 0.249899 -1.175492  
H -2.857146 0.658970 -0.555913  
C -2.722023 -2.246785 5.042256

H -2.815219 -3.079688 5.729412  
C -3.328688 -3.252750 0.494154  
H -3.952929 -2.368669 0.553394  
C 3.369987 -3.472987 4.038414  
H 4.122738 -4.232521 4.215137  
C 2.321464 -3.725673 3.161021  
H 2.253016 -4.682405 2.656027  
C -3.856338 -1.608627 4.564223  
H -4.839365 -1.940686 4.877481  
C -1.524430 -4.471271 -0.548567  
H -0.760020 -4.541007 -1.315215  
C -2.704688 -5.423244 1.315646  
H -2.851906 -6.238791 2.014089  
C -1.715077 -5.512268 0.345265  
H -1.095146 -6.398554 0.278546  
C -3.511446 -4.296519 1.387525  
H -4.281076 -4.224295 2.146861  
C -4.799589 0.981368 -1.411050  
H -4.907953 1.966883 -0.973789  
C 3.455409 -2.248248 4.681247  
H 4.275103 -2.042953 5.359472  
C -4.497331 -1.523825 -2.568147  
H -4.366540 -2.490802 -3.042492  
C -5.803419 0.460183 -2.213262  
H -6.701980 1.036696 -2.399887  
C -5.653183 -0.795088 -2.788351  
H -6.431612 -1.201012 -3.423506  
Au 1.015250 1.907185 3.915129  
C 1.510873 3.664357 4.888095  
C 0.882455 4.862707 4.608413  
C 2.556766 3.738777 5.788904  
C 1.236957 6.076402 5.181692  
C 2.288592 6.085120 6.086994  
C 2.965451 4.915653 6.403115  
F -3.231961 -2.623339 -6.093231  
F -2.654471 -7.225033 -6.651986  
F 0.126425 -4.874664 -3.725386  
F 3.231961 2.623339 6.093231  
F -0.126425 4.874664 3.725386  
F 2.654471 7.225033 6.651986  
Cl 0.419432 7.530478 4.790924  
Cl 4.267404 4.945605 7.516280  
Cl -4.267404 -4.945605 -7.516280  
Cl -0.419432 -7.530478 -4.790924

124

**Model\_3 S1**

Au 4.371567 -0.701614 -0.290961  
Cl 7.083199 -1.089493 1.595187  
Cl 9.813341 0.332350 1.173672  
Cl 10.190607 2.291883 -1.207017  
Cl 7.842423 2.815381 -3.172763  
Cl 5.121594 1.372412 -2.758465  
P 2.449948 -2.028822 -0.279689  
P -2.896272 -0.759818 -1.100472  
C 6.218500 0.181084 -0.611517  
C 7.290882 -0.016455 0.252168  
C 8.520814 0.616394 0.087237  
C 8.693575 1.497161 -0.982277  
C 7.637283 1.729321 -1.864768  
C 6.427369 1.069824 -1.660834  
C 1.078864 -0.917549 -0.125649  
C -0.223479 -1.259048 -0.564142  
H -0.391234 -2.221183 -1.032474  
C -1.265116 -0.372430 -0.452971  
C 2.381802 -3.211534 1.094841  
C 3.521162 -3.423675 1.865826  
H 4.450188 -2.933244 1.593574  
C 3.463617 -4.238084 2.986887  
H 4.353350 -4.390034 3.586446  
C 2.269136 -4.843093 3.344295  
H 2.222393 -5.474352 4.224150  
C 1.127772 -4.634977 2.577930  
H 0.192012 -5.105964 2.856487  
C 1.180727 -3.821900 1.459793  
H 0.282912 -3.651633 0.875760  
C 2.088132 -2.990776 -1.769775  
C 1.757692 -2.299665 -2.936559  
H 1.733060 -1.215417 -2.927707  
C 1.448965 -2.992121 -4.093471  
H 1.188584 -2.446733 -4.993158  
C 1.472662 -4.381229 -4.100641  
H 1.230482 -4.923284 -5.007427  
C 1.809196 -5.072037 -2.946735  
H 1.829961 -6.155659 -2.947917  
C 2.115955 -4.381853 -1.783187  
H 2.368034 -4.925975 -0.880973  
C -2.928934 -2.554170 -1.268566  
C -3.387261 -3.309897 -0.190367  
H -3.778737 -2.810794 0.689894  
C -3.341643 -4.692990 -0.246891  
H -3.701716 -5.277133 0.591855

C -2.845013 -5.326984 -1.378583  
H -2.810528 -6.409429 -1.420873  
C -2.399918 -4.577661 -2.458230  
H -2.006237 -5.070607 -3.339220  
C -2.445635 -3.193158 -2.409839  
H -2.090528 -2.606401 -3.249047  
C -2.916020 -0.080222 -2.773762  
C -1.820944 0.597987 -3.303886  
H -0.905338 0.673604 -2.730248  
C -1.910241 1.186601 -4.555555  
H -1.059953 1.726407 -4.955280  
C -3.084733 1.094537 -5.286823  
H -3.152703 1.558705 -6.263856  
C -4.177758 0.415446 -4.763859  
H -5.099443 0.347022 -5.329668  
C -4.099582 -0.161073 -3.508172  
H -4.964076 -0.663150 -3.087943  
P -2.449948 2.028822 0.279689  
P 2.896272 0.759818 1.100472  
C -1.078864 0.917549 0.125649  
C 0.223479 1.259048 0.564142  
H 0.391234 2.221183 1.032474  
C 1.265116 0.372430 0.452971  
C -2.381802 3.211534 -1.094841  
C -3.521162 3.423675 -1.865826  
H -4.450188 2.933244 -1.593574  
C -3.463617 4.238084 -2.986887  
H -4.353350 4.390034 -3.586446  
C -2.269136 4.843093 -3.344295  
H -2.222393 5.474352 -4.224150  
C -1.127772 4.634977 -2.577930  
H -0.192012 5.105964 -2.856487  
C -1.180727 3.821900 -1.459793  
H -0.282912 3.651633 -0.875760  
C -2.088132 2.990776 1.769775  
C -1.757692 2.299665 2.936559  
H -1.733060 1.215417 2.927707  
C -1.448965 2.992121 4.093471  
H -1.188584 2.446733 4.993158  
C -1.472662 4.381229 4.100641  
H -1.230482 4.923284 5.007427  
C -1.809196 5.072037 2.946735  
H -1.829961 6.155659 2.947917  
C -2.115955 4.381853 1.783187  
H -2.368034 4.925975 0.880973  
C 2.928934 2.554170 1.268566  
C 3.387261 3.309897 0.190367

H 3.778737 2.810794 -0.689894  
C 3.341643 4.692990 0.246891  
H 3.701716 5.277133 -0.591855  
C 2.845013 5.326984 1.378583  
H 2.810528 6.409429 1.420873  
C 2.399918 4.577661 2.458230  
H 2.006237 5.070607 3.339220  
C 2.445635 3.193158 2.409839  
H 2.090528 2.606401 3.249047  
C 2.916020 0.080222 2.773762  
C 1.820944 -0.597987 3.303886  
H 0.905338 -0.673604 2.730248  
C 1.910241 -1.186601 4.555555  
H 1.059953 -1.726407 4.955280  
C 3.084733 -1.094537 5.286823  
H 3.152703 -1.558705 6.263856  
C 4.177758 -0.415446 4.763859  
H 5.099443 -0.347022 5.329668  
C 4.099582 0.161073 3.508172  
H 4.964076 0.663150 3.087943  
Au -4.371567 0.701614 0.290961  
Cl -7.083199 1.089493 -1.595187  
Cl -9.813341 -0.332350 -1.173672  
Cl -10.190607 -2.291883 1.207017  
Cl -7.842423 -2.815381 3.172763  
Cl -5.121594 -1.372412 2.758465  
C -6.218500 -0.181084 0.611517  
C -7.290882 0.016455 -0.252168  
C -8.520814 -0.616394 -0.087237  
C -8.693575 -1.497161 0.982277  
C -7.637283 -1.729321 1.864768  
C -6.427369 -1.069824 1.660834

17. Representation of DFT optimized complexes **1-3** in the  $T_1$  state (PBE0 functional)

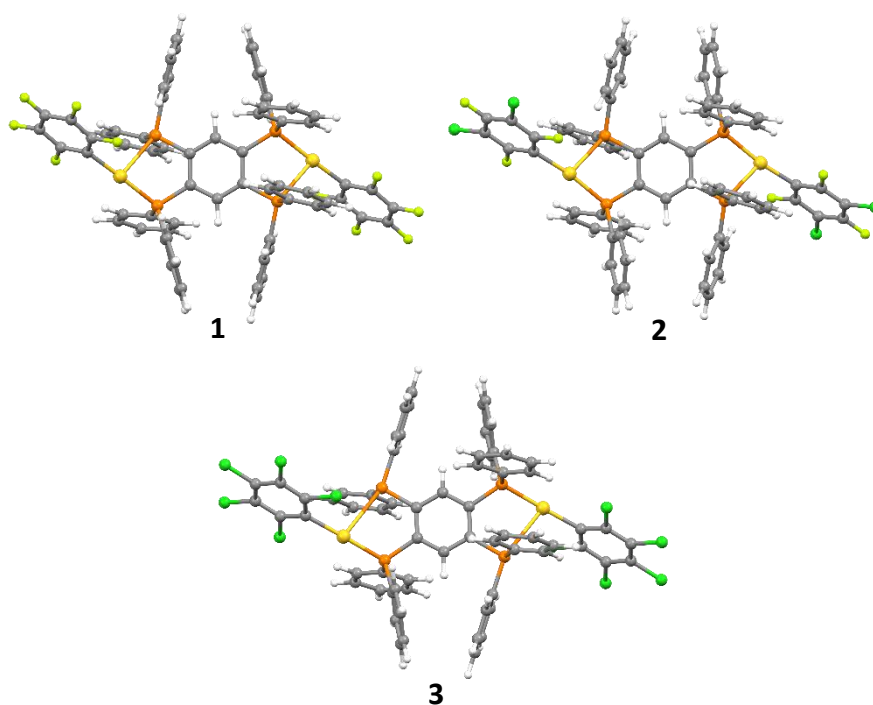

**Figure S48.** Model Systems of complexes **1-3** in the ground state  $S_0$ .

18. xyz coordinates for models **1a-3a** in the  $T_1$  state (PBE0 functional)

124

**Model\_1 T1**

```
Au -1.069808 -1.856937 -3.863328
P -0.351862 0.247798 -3.163951
P 2.099267 1.822914 1.539479
C -1.542930 -3.673182 -4.730390
C -0.149759 0.147089 -1.397699
C 0.782050 0.908243 -0.718313
H 1.401331 1.603789 -1.274768
C 0.972362 0.794387 0.657187
C 3.648655 0.931548 1.816979
C -0.885383 -4.838864 -4.385820
C 1.229420 0.882770 -3.769513
C 2.324313 0.018336 -3.748375
H 2.188404 -1.011620 -3.435500
C -2.588206 -3.813316 -5.624022
C -1.585589 1.538359 -3.491524
C -1.221654 -6.079458 -4.898240
C 3.576528 0.472477 -4.119806
```



H 4.422665 -0.204198 -4.099180  
C 1.401405 2.198651 -4.184933  
H 0.555824 2.874836 -4.209678  
C -1.642825 2.683621 -2.699659  
H -0.934555 2.813989 -1.888454  
C 2.480597 3.203802 0.450214  
C -2.520459 1.354662 -4.505645  
H -2.491664 0.450700 -5.105131  
C -2.270880 -6.173659 -5.797987  
C -2.962819 -5.031120 -6.165511  
C 3.888699 -0.304111 1.223201  
H 3.158008 -0.715789 0.536520  
C 2.659724 2.648957 -4.560739  
H 2.787551 3.677838 -4.875850  
C 3.602510 3.208532 -0.376549  
H 4.304091 2.383489 -0.338275  
C -3.544443 3.454532 -3.948290  
H -4.313298 4.198658 -4.121589  
C -2.614732 3.641642 -2.933712  
H -2.654082 4.531524 -2.316070  
C 3.746453 1.791326 -4.525167  
H 4.728061 2.145638 -4.817806  
C 1.581355 4.270085 0.403653  
H 0.723080 4.278168 1.067081  
C 2.903757 5.309567 -1.312416  
H 3.068166 6.130421 -2.000820  
C 1.792412 5.315935 -0.478265  
H 1.094323 6.144324 -0.507536  
C 3.807366 4.259012 -1.257931  
H 4.672923 4.250889 -1.909853  
C 5.046873 -1.003863 1.523967  
H 5.223823 -1.971223 1.068786  
C -3.498726 2.310836 -4.730738  
H -4.232759 2.154830 -5.512227  
C 4.572974 1.456670 2.720494  
H 4.372421 2.404183 3.209432  
C 5.970164 -0.472118 2.411608  
H 6.872676 -1.023356 2.649046  
C 5.734211 0.760592 3.007012  
H 6.449319 1.172840 3.709161  
P 0.351862 -0.247798 3.163951  
P -2.099267 -1.822914 -1.539479  
C 0.149759 -0.147089 1.397699  
C -0.782050 -0.908243 0.718313  
H -1.401331 -1.603789 1.274768  
C -0.972362 -0.794387 -0.657187  
C -3.648655 -0.931548 -1.816979

C -1.229420 -0.882770 3.769513  
C -2.324313 -0.018336 3.748375  
H -2.188404 1.011620 3.435500  
C 1.585589 -1.538359 3.491524  
C -3.576528 -0.472477 4.119806  
H -4.422665 0.204198 4.099180  
C -1.401405 -2.198651 4.184933  
H -0.555824 -2.874836 4.209678  
C 1.642825 -2.683621 2.699659  
H 0.934555 -2.813989 1.888454  
C -2.480597 -3.203802 -0.450214  
C 2.520459 -1.354662 4.505645  
H 2.491664 -0.450700 5.105131  
C -3.888699 0.304111 -1.223201  
H -3.158008 0.715789 -0.536520  
C -2.659724 -2.648957 4.560739  
H -2.787551 -3.677838 4.875850  
C -3.602510 -3.208532 0.376549  
H -4.304091 -2.383489 0.338275  
C 3.544443 -3.454532 3.948290  
H 4.313298 -4.198658 4.121589  
C 2.614732 -3.641642 2.933712  
H 2.654082 -4.531524 2.316070  
C -3.746453 -1.791326 4.525167  
H -4.728061 -2.145638 4.817806  
C -1.581355 -4.270085 -0.403653  
H -0.723080 -4.278168 -1.067081  
C -2.903757 -5.309567 1.312416  
H -3.068166 -6.130421 2.000820  
C -1.792412 -5.315935 0.478265  
H -1.094323 -6.144324 0.507536  
C -3.807366 -4.259012 1.257931  
H -4.672923 -4.250889 1.909853  
C -5.046873 1.003863 -1.523967  
H -5.223823 1.971223 -1.068786  
C 3.498726 -2.310836 4.730738  
H 4.232759 -2.154830 5.512227  
C -4.572974 -1.456670 -2.720494  
H -4.372421 -2.404183 -3.209432  
C -5.970164 0.472118 -2.411608  
H -6.872676 1.023356 -2.649046  
C -5.734211 -0.760592 -3.007012  
H -6.449319 -1.172840 -3.709161  
Au 1.069808 1.856937 3.863328  
C 1.542930 3.673182 4.730390  
C 0.885383 4.838864 4.385820  
C 2.588206 3.813316 5.624022

C 1.221654 6.079458 4.898240  
C 2.270880 6.173659 5.797987  
C 2.962819 5.031120 6.165511  
F -0.132586 4.801490 3.508002  
F 0.560782 7.177982 4.541811  
F 2.613653 7.352602 6.301956  
F 3.972936 5.123971 7.026340  
F 3.299274 2.738020 6.000734  
F 0.132586 -4.801490 -3.508002  
F -0.560782 -7.177982 -4.541811  
F -2.613653 -7.352602 -6.301956  
F -3.972936 -5.123971 -7.026340  
F -3.299274 -2.738020 -6.000734

124

**Model\_2 T1**

Au -1.031112 -1.849228 -3.895467  
P -0.340587 0.255401 -3.164319  
P 2.029419 1.884043 1.559100  
C -1.513131 -3.653124 -4.786633  
C -0.168236 0.158492 -1.402455  
C 0.710015 0.981007 -0.695566  
H 1.284539 1.725781 -1.235151  
C 0.911096 0.843249 0.663988  
C 3.556398 0.953974 1.829738  
C -0.879804 -4.832376 -4.444803  
C 1.253345 0.886894 -3.748255  
C 2.396728 0.143841 -3.450961  
H 2.302591 -0.789075 -2.905549  
C -2.558058 -3.779138 -5.682313  
C -1.552730 1.549752 -3.556201  
C -1.231413 -6.076460 -4.950915  
C 3.644011 0.599544 -3.836381  
H 4.526760 0.017513 -3.598678  
C 1.376777 2.082028 -4.448198  
H 0.494861 2.664906 -4.683820  
C -1.571429 2.743378 -2.836049  
H -0.837690 2.917026 -2.056353  
C 2.432922 3.253009 0.460701  
C -2.516133 1.321171 -4.533371  
H -2.515157 0.383001 -5.078657  
C -2.283849 -6.137555 -5.853115  
C -2.963782 -4.988806 -6.231760  
C 3.763845 -0.291400 1.243326  
H 3.018680 -0.694021 0.567208  
C 2.630587 2.534283 -4.835958  
H 2.718631 3.469627 -5.376274

C 3.491965 3.183655 -0.443076  
H 4.130249 2.307898 -0.460755  
C -3.496085 3.466445 -4.079026  
H -4.257975 4.211415 -4.277560  
C -2.536091 3.699582 -3.101664  
H -2.545114 4.626344 -2.539568  
C 3.763387 1.798415 -4.529410  
H 4.741356 2.154805 -4.831648  
C 1.615092 4.382413 0.487038  
H 0.806469 4.444520 1.207341  
C 2.888696 5.342497 -1.310044  
H 3.065563 6.157125 -2.002685  
C 1.843283 5.422152 -0.399028  
H 1.209248 6.300551 -0.372139  
C 3.712224 4.226200 -1.329580  
H 4.525121 4.161395 -2.043037  
C 4.908871 -1.014290 1.539640  
H 5.058461 -1.990174 1.093036  
C -3.486418 2.277906 -4.791877  
H -4.241429 2.087036 -5.545221  
C 4.501965 1.466674 2.718151  
H 4.328347 2.423209 3.199684  
C 5.852865 -0.495220 2.412770  
H 6.745133 -1.064454 2.646284  
C 5.650981 0.748011 2.998386  
H 6.382784 1.151439 3.688284  
P 0.340587 -0.255401 3.164319  
P -2.029419 -1.884043 -1.559100  
C 0.168236 -0.158492 1.402455  
C -0.710015 -0.981007 0.695566  
H -1.284539 -1.725781 1.235151  
C -0.911096 -0.843249 -0.663988  
C -3.556398 -0.953974 -1.829738  
C -1.253345 -0.886894 3.748255  
C -2.396728 -0.143841 3.450961  
H -2.302591 0.789075 2.905549  
C 1.552730 -1.549752 3.556201  
C -3.644011 -0.599544 3.836381  
H -4.526760 -0.017513 3.598678  
C -1.376777 -2.082028 4.448198  
H -0.494861 -2.664906 4.683820  
C 1.571429 -2.743378 2.836049  
H 0.837690 -2.917026 2.056353  
C -2.432922 -3.253009 -0.460701  
C 2.516133 -1.321171 4.533371  
H 2.515157 -0.383001 5.078657  
C -3.763845 0.291400 -1.243326

H -3.018680 0.694021 -0.567208  
C -2.630587 -2.534283 4.835958  
H -2.718631 -3.469627 5.376274  
C -3.491965 -3.183655 0.443076  
H -4.130249 -2.307898 0.460755  
C 3.496085 -3.466445 4.079026  
H 4.257975 -4.211415 4.277560  
C 2.536091 -3.699582 3.101664  
H 2.545114 -4.626344 2.539568  
C -3.763387 -1.798415 4.529410  
H -4.741356 -2.154805 4.831648  
C -1.615092 -4.382413 -0.487038  
H -0.806469 -4.444520 -1.207341  
C -2.888696 -5.342497 1.310044  
H -3.065563 -6.157125 2.002685  
C -1.843283 -5.422152 0.399028  
H -1.209248 -6.300551 0.372139  
C -3.712224 -4.226200 1.329580  
H -4.525121 -4.161395 2.043037  
C -4.908871 1.014290 -1.539640  
H -5.058461 1.990174 -1.093036  
C 3.486418 -2.277906 4.791877  
H 4.241429 -2.087036 5.545221  
C -4.501965 -1.466674 -2.718151  
H -4.328347 -2.423209 -3.199684  
C -5.852865 0.495220 -2.412770  
H -6.745133 1.064454 -2.646284  
C -5.650981 -0.748011 -2.998386  
H -6.382784 -1.151439 -3.688284  
Au 1.031112 1.849228 3.895467  
C 1.513131 3.653124 4.786633  
C 0.879804 4.832376 4.444803  
C 2.558058 3.779138 5.682313  
C 1.231413 6.076460 4.950915  
C 2.283849 6.137555 5.853115  
C 2.963782 4.988806 6.231760  
F -3.237443 -2.683786 -6.045690  
F -2.647264 -7.307686 -6.354671  
F 0.130927 -4.793841 -3.564378  
F 3.237443 2.683786 6.045690  
F -0.130927 4.793841 3.564378  
F 2.647264 7.307686 6.354671  
Cl 0.409690 7.504824 4.481526  
Cl 4.266987 5.082264 7.339961  
Cl -4.266987 -5.082264 -7.339961  
Cl -0.409690 -7.504824 -4.481526

124

**Model\_3 T1**

Au 4.324836 -0.725547 -0.235908  
Cl 7.137144 -1.076811 1.516058  
Cl 9.780202 0.486021 1.042484  
Cl 9.970413 2.547208 -1.273751  
Cl 7.523265 3.029478 -3.125994  
Cl 4.890450 1.447348 -2.662287  
P 2.419222 -2.071335 -0.190019  
P -2.849577 -0.713721 -1.215342  
C 6.121317 0.241890 -0.595751  
C 7.237942 0.058812 0.212917  
C 8.431444 0.751560 0.021787  
C 8.520388 1.677537 -1.019283  
C 7.419603 1.891672 -1.850242  
C 6.249122 1.171662 -1.622012  
C 1.046419 -0.955221 -0.063026  
C -0.208419 -1.250543 -0.588238  
H -0.367447 -2.211087 -1.066343  
C -1.249076 -0.339975 -0.556950  
C 2.372411 -3.200927 1.229728  
C 3.550572 -3.509681 1.902009  
H 4.491271 -3.098780 1.550269  
C 3.517233 -4.316518 3.029421  
H 4.436547 -4.541461 3.556995  
C 2.309582 -4.821012 3.486004  
H 2.283684 -5.446970 4.370525  
C 1.130097 -4.515334 2.818182  
H 0.184248 -4.903844 3.177895  
C 1.159083 -3.702283 1.698352  
H 0.235098 -3.440902 1.193627  
C 2.055587 -3.081181 -1.646908  
C 1.997929 -2.434478 -2.882486  
H 2.208520 -1.371820 -2.941324  
C 1.667033 -3.141553 -4.023520  
H 1.622803 -2.631660 -4.978739  
C 1.398628 -4.503374 -3.945311  
H 1.140599 -5.057070 -4.840641  
C 1.467414 -5.151818 -2.723447  
H 1.259843 -6.213502 -2.657881  
C 1.795797 -4.445193 -1.574363  
H 1.841886 -4.955550 -0.620234  
C -2.895299 -2.501352 -1.427227  
C -3.256894 -3.286876 -0.332906  
H -3.567354 -2.811445 0.591373  
C -3.219602 -4.667554 -0.429548  
H -3.505801 -5.273740 0.421966

C -2.827746 -5.271616 -1.617651  
H -2.799191 -6.352561 -1.691401  
C -2.479282 -4.493326 -2.711579  
H -2.168263 -4.962916 -3.637264  
C -2.516479 -3.110304 -2.622466  
H -2.237113 -2.501098 -3.474032  
C -2.960145 0.008298 -2.869125  
C -1.871263 0.649887 -3.452803  
H -0.922250 0.673575 -2.930273  
C -2.009386 1.263633 -4.687998  
H -1.162681 1.774488 -5.131059  
C -3.227806 1.230807 -5.349112  
H -3.333982 1.713759 -6.313601  
C -4.315351 0.587237 -4.772266  
H -5.270459 0.565191 -5.283888  
C -4.187186 -0.012618 -3.531835  
H -5.044813 -0.486639 -3.067469  
P -2.419222 2.071335 0.190019  
P 2.849577 0.713721 1.215342  
C -1.046419 0.955221 0.063026  
C 0.208419 1.250543 0.588238  
H 0.367447 2.211087 1.066343  
C 1.249076 0.339975 0.556950  
C -2.372411 3.200927 -1.229728  
C -3.550572 3.509681 -1.902009  
H -4.491271 3.098780 -1.550269  
C -3.517233 4.316518 -3.029421  
H -4.436547 4.541461 -3.556995  
C -2.309582 4.821012 -3.486004  
H -2.283684 5.446970 -4.370525  
C -1.130097 4.515334 -2.818182  
H -0.184248 4.903844 -3.177895  
C -1.159083 3.702283 -1.698352  
H -0.235098 3.440902 -1.193627  
C -2.055587 3.081181 1.646908  
C -1.997929 2.434478 2.882486  
H -2.208520 1.371820 2.941324  
C -1.667033 3.141553 4.023520  
H -1.622803 2.631660 4.978739  
C -1.398628 4.503374 3.945311  
H -1.140599 5.057070 4.840641  
C -1.467414 5.151818 2.723447  
H -1.259843 6.213502 2.657881  
C -1.795797 4.445193 1.574363  
H -1.841886 4.955550 0.620234  
C 2.895299 2.501352 1.427227  
C 3.256894 3.286876 0.332906

H 3.567354 2.811445 -0.591373  
C 3.219602 4.667554 0.429548  
H 3.505801 5.273740 -0.421966  
C 2.827746 5.271616 1.617651  
H 2.799191 6.352561 1.691401  
C 2.479282 4.493326 2.711579  
H 2.168263 4.962916 3.637264  
C 2.516479 3.110304 2.622466  
H 2.237113 2.501098 3.474032  
C 2.960145 -0.008298 2.869125  
C 1.871263 -0.649887 3.452803  
H 0.922250 -0.673575 2.930273  
C 2.009386 -1.263633 4.687998  
H 1.162681 -1.774488 5.131059  
C 3.227806 -1.230807 5.349112  
H 3.333982 -1.713759 6.313601  
C 4.315351 -0.587237 4.772266  
H 5.270459 -0.565191 5.283888  
C 4.187186 0.012618 3.531835  
H 5.044813 0.486639 3.067469  
Au -4.324836 0.725547 0.235908  
Cl -7.137144 1.076811 -1.516058  
Cl -9.780202 -0.486021 -1.042484  
Cl -9.970413 -2.547208 1.273751  
Cl -7.523265 -3.029478 3.125994  
Cl -4.890450 -1.447348 2.662287  
C -6.121317 -0.241890 0.595751  
C -7.237942 -0.058812 -0.212917  
C -8.431444 -0.751560 -0.021787  
C -8.520388 -1.677537 1.019283  
C -7.419603 -1.891672 1.850242  
C -6.249122 -1.171662 1.622012
